# Supplementary material
Source: PubMed Central journal article supplement (PMC6949389)
Supplement: NIHMS1544737-supplement-1.pdf [file NIHMS1544737-supplement-1.pdf]

## Online Repository Materials

### **Molecular, Endoscopic, Histologic, and Circulating Biomarker-Based Diagnosis of Eosinophilic Gastritis: Multi-Site Study**

Tetsuo Shoda<sup>a</sup>, Ting Wen<sup>a</sup>, Julie M. Caldwell<sup>a</sup>, Margaret H. Collins<sup>b</sup>, John A. Besse<sup>a</sup>, Garrett A. Osswald<sup>a</sup>, J. Pablo Abonia<sup>a</sup>, Nicoleta C. Arva<sup>c</sup>, Dan Atkins<sup>d</sup>, Kelley E. Capocelli<sup>e</sup>, Evan S. Dellon<sup>f</sup>, Gary W. Falk<sup>g</sup>, Nirmala Gonsalves<sup>h</sup>, Sandeep K. Gupta<sup>i</sup>, Ikuo Hirano<sup>h</sup>, Vincent A. Mikkada<sup>j</sup>, Philip E. Putnam<sup>j</sup>, Rachel M. Sheridan<sup>b</sup>, Rudman Spergel AK<sup>k</sup>, Jonathan M. Spergel<sup>l</sup>, Joshua B. Wechsler<sup>m</sup>, Guang-Yu Yang<sup>n</sup>, Seema S. Aceves<sup>o</sup>, Glenn T. Furuta<sup>p</sup> and Marc E. Rothenberg<sup>a</sup> on behalf of the Consortium of Eosinophilic Gastrointestinal Disease Researchers (CEGIR)\*

*<sup>a</sup>Division of Allergy and Immunology, University of Cincinnati College of Medicine and Cincinnati Children's Hospital Medical Center, <sup>b</sup>Division of Pathology, University of Cincinnati College of Medicine and Cincinnati Children's Hospital Medical Center, <sup>c</sup>Department of Pathology, Ann & Robert H. Lurie Children's Hospital of Chicago, Feinberg School of Medicine, Northwestern University, <sup>d</sup>Section of Pediatric Allergy and Immunology, Children's Hospital Colorado, <sup>e</sup>Department of Pathology, Children's Hospital Colorado, <sup>f</sup>Division of Gastroenterology and Hepatology, University of North Carolina School of Medicine, <sup>g</sup>Division of Gastroenterology, University of Pennsylvania Perelman School of Medicine, <sup>h</sup>Division of Gastroenterology & Hepatology, Northwestern University, <sup>i</sup>Division of Pediatric Gastroenterology, Hepatology and Nutrition, University of Illinois College of Medicine/Children's Hospital of Illinois, <sup>j</sup>Division of Gastroenterology, Hepatology, and Nutrition, University of Cincinnati College of Medicine and Cincinnati Children's Hospital Medical Center, <sup>k</sup>Allergy, Asthma and Airway Biology Branch Division of Allergy, Immunology and Transplantation, National Institute of Allergy and Infectious Diseases, NIH, <sup>l</sup>Division of Allergy and Immunology, University of Pennsylvania Perelman School of Medicine/Children's Hospital of Philadelphia, <sup>m</sup>Gastroenterology, Hepatology & Nutrition, Ann & Robert H. Lurie Children's Hospital of Chicago, <sup>n</sup>Department of Pathology and Laboratory Medicine, Northwestern University, <sup>o</sup>Division of Allergy Immunology, University of California-San Diego, Rady Children's Hospital, San Diego, <sup>p</sup>Section of Pediatric Gastroenterology, Hepatology and Nutrition, Digestive Health Institute, Children's Hospital Colorado.*

\*The list of participants is provided in this article's Supplementary Material

**Corresponding Author:** Marc E. Rothenberg, MD, PhD, Division of Allergy and Immunology, Cincinnati Children's Hospital Medical Center, Department of Pediatrics, University of Cincinnati College of Medicine: 3333 Burnet Avenue, ML 7028, Cincinnati, OH, 45229 USA; email: Rothenberg@cchmc.org; telephone: 513-803-0257

## **Overview of Contents**

### **List of participants in CEGIR**

#### **Supplementary Tables**

Supplementary Table 1. List of EGDP genes

Supplementary Table 2. Definition of EG histologic features

Supplementary Table 3. Screening of differentially expressed gene sets for EGDP

Supplementary Table 4. Spearman correlations between EG diagnostic parameters and a diagnostic subset of the EG transcriptome

Supplementary Table 5. Spearman correlations between EG histologic features and a diagnostic subset of the EG transcriptome

Supplementary Table 6. Spearman correlations between EG endoscopic features and a diagnostic subset of the EG transcriptome

Supplementary Table 7. Circulating biomarker levels of non-EG and active EG groups

#### **Supplementary Figures**

Supplementary Figure 1. Comparison between EG transcriptome genes identified by RNA sequencing and previously published microarray data

Supplementary Figure 2. EGDP performance across the sites in the discovery cohort

Supplementary Figure 3. Comparison of EGDP<sub>18</sub> score among clinically stratified patients with active EG

Supplementary Figure 4. EGDP<sub>18</sub> score as a function of patient groups stratified by treatment status at biopsy

Supplementary Figure 5. Correlations between EG histologic features and a diagnostic subset of the EG transcriptome

Supplementary Figure 6. Correlations between EG endoscopic features and a diagnostic subset of the EG transcriptome

Supplementary Figure 7. Heat map showing  $-\log_{10}$  FDR  $P$  value determined by differential expression between patients with EG with or without a specific endoscopic feature by the Mann-Whitney  $U$  test

Supplementary Figure 8. Development of blood EG score based on significantly increased biomarkers

### **List of EG transcriptome genes identified by RNA sequencing**

#### **Consortium of Eosinophilic Gastrointestinal Disease Researchers (CEGIR) questionnaires**

Registry for Eosinophilic Gastrointestinal Diseases (REGID) Provider Questionnaire

CEGIR Outcomes Measures in Eosinophilic Gastrointestinal disorders Across the ages

(OMEGA) Patient Intake Questionnaire

### List of participants in CEGIR

| <b>Given Name</b> | <b>Surname</b> |
|-------------------|----------------|
| J.Pablo           | Abonia         |
| Seema             | Aceves         |
| Samuel            | Almonte        |
| Rachel            | Andrews        |
| Ashley            | Arrington      |
| Nicoleta          | Arva           |
| Fred              | Atkins         |
| Dominique         | Bailey         |
| Alexis            | Berry          |
| Bridget           | Besl           |
| Scott             | Bolton         |
| Peter             | Bonis          |
| Wendy             | Book           |
| Kimberly          | Bray           |
| Teresa            | Brown          |
| Cassandra         | Burger         |
| Deirdre           | Burke          |
| Jonathon          | Cahoon         |
| Kelley            | Capocelli      |
| Mirna             | Cehade         |
| Margaret          | Collins        |
| Carla             | Davis          |
| Evan              | Dellon         |
| Maureen           | DeMarshall     |
| Lauren            | DiTommaso      |
| Ranjan            | Dohil          |
| Michael           | Eby            |
| Gary              | Falk           |
| David             | Fleischer      |
| Heather           | Foote          |
| Kelci             | Foss           |
| Joel              | Friedlander    |
| Patricia          | Fulkerson      |
| Glenn             | Furuta         |
| Debra             | Geno           |
| Nirmala           | Gonsalves      |
| Thomas            | Greuter        |
| Sandeep           | Gupta          |
| Frank             | Hamilton       |
| Kirk              | Harris         |
| Jennifer          | Harris         |
| Ikuo              | Hirano         |

|                      |                |
|----------------------|----------------|
| Girish               | Hiremath       |
| Nicole               | Holland-Thomas |
| Lea                  | Jacinto        |
| Amir                 | Kagalwalla     |
| Timothy              | Kaseta         |
| David                | Katzka         |
| Kaitlin              | Keeley         |
| Emad                 | Khosh-Hemmat   |
| Paneez               | Khoury         |
| Eileen               | King           |
| Kara                 | Kliewer        |
| Amy                  | Klion          |
| Jennifer             | Knowles        |
| Kendra               | Kocher         |
| Ellyn                | Kodroff        |
| Jeffrey              | Krischer       |
| Shay                 | Kyle           |
| John                 | Leung          |
| Meredith             | Levy           |
| Chris                | Liacouras      |
| Denise               | Mack           |
| Lisa                 | Martin         |
| Ellen                | Martin         |
| Talaya               | McCright-Gill  |
| Paul                 | Menard-Katcher |
| Calies               | Menard-Katcher |
| Gabriela             | Mendoza        |
| Melissa              | Mingler        |
| Mike                 | Minnicozzi     |
| Amanda               | Muir           |
| Vincent              | Mukkada        |
| Cristin              | MurrayPetzold  |
| Robert               | Newbury        |
| Quan                 | Nhu            |
| Oghenekpaobor (Joel) | Oyibo          |
| Allisa               | Paliana        |
| Zhaoxing             | Pan            |
| Robbie               | Pesek          |
| Kathryn              | Peterson       |
| Heidi                | Poppendeck     |
| Philip               | Putnam         |
| Fabian               | Rivera         |
| Marc                 | Rothenberg     |
| Amanda               | Rudman-Spergel |

|           |           |
|-----------|-----------|
| Kathleen  | Sable     |
| Alain     | Schoepfer |
| Melissa   | Scott     |
| Rachel    | Sheridan  |
| Selma     | Sinanovic |
| Jonathan  | Spergel   |
| MaryJo    | Strobel   |
| Kiki      | Sun       |
| Amy       | Tasco     |
| Crystal   | Tholen    |
| Katherine | Thompson  |
| Tiffany   | Tomkinson |
| Daisy     | Tran      |
| Alexandra | Tylicki   |
| Tiina     | Urv       |
| Mei-Lun   | Wang      |
| Joshua    | Wechsler  |
| Barry     | Wershil   |
| Lisa      | Wheatley  |
| Leah      | Wilkey    |
| Guang-Yu  | Yang      |
| Angelika  | Zalewski  |
| Amy       | Zicarelli |

---

**Supplementary Table 1.** List of EGDP genes

| <b>Gene Symbol</b> | <b>Description</b>                                               | <b>Fold Change<br/>(EG vs. Non-EG)</b> | <b>Representative<br/>Functionality</b> | <b>AssayID</b> |
|--------------------|------------------------------------------------------------------|----------------------------------------|-----------------------------------------|----------------|
| <i>ACPP</i>        | acid phosphatase, prostate                                       | 1.2                                    | Epithelium-related                      | Hs00173475_m1  |
| <i>ANXA1</i>       | annexin A1                                                       | 2.2                                    | Inflammatory response                   | Hs00167549_m1  |
| <i>AREG</i>        | amphiregulin                                                     | -1.0                                   | Fibrosis                                | Hs00950669_m1  |
| <i>ATP4A</i>       | ATPase H <sup>+</sup> /K <sup>+</sup> transporting subunit alpha | -5.4                                   | Stomach-related                         | Hs00167575_m1  |
| <i>BMP3</i>        | bone morphogenetic protein 3                                     | -13.8                                  | Fibrosis                                | Hs00609638_m1  |
| <i>CCK</i>         | cholecystokinin                                                  | -1.0                                   | Stomach-related                         | Hs00174937_m1  |
| <i>CCL11</i>       | C-C motif chemokine ligand 11                                    | -1.0                                   | Cytokine/Chemokine                      | Hs00237013_m1  |
| <i>CCL18</i>       | C-C motif chemokine ligand 18                                    | 8.6                                    | Cytokine/Chemokine                      | Hs00268113_m1  |
| <i>CCL24</i>       | C-C motif chemokine ligand 24                                    | 3.2                                    | Cytokine/Chemokine                      | Hs00171082_m1  |
| <i>CCL26</i>       | C-C motif chemokine ligand 26                                    | 210.3                                  | Cytokine/Chemokine                      | Hs00171146_m1  |
| <i>CCR3</i>        | C-C motif chemokine receptor 3                                   | 2.4                                    | Eosinophil                              | Hs99999027_s1  |
| <i>CDH26</i>       | cadherin 26                                                      | 14.2                                   | Cell adhesion                           | Hs00375371_m1  |
| <i>CHIA</i>        | chitinase, acidic                                                | 1.3                                    | Other                                   | Hs00253976_m1  |
| <i>CLC</i>         | Charcot-Leyden crystal galectin                                  | 10.7                                   | Eosinophil                              | Hs00171342_m1  |
| <i>COL2A1</i>      | collagen type II alpha 1 chain                                   | -3.6                                   | Fibrosis                                | Hs01064869_m1  |
| <i>CPA3</i>        | carboxypeptidase A3                                              | 1.7                                    | Mast cell                               | Hs00157019_m1  |
| <i>CXCL8</i>       | C-X-C motif chemokine ligand 8                                   | 2.1                                    | Neutrophil                              | Hs99999034_m1  |
| <i>DEFB1</i>       | defensin beta 1                                                  | -12.3                                  | Antimicrobial defense                   | Hs00608345_m1  |
| <i>DUOX2</i>       | dual oxidase 2                                                   | 3.2                                    | Inflammatory response                   | Hs00204187_m1  |
| <i>DUOXA2</i>      | dual oxidase maturation factor 2                                 | 3.8                                    | Inflammatory response                   | Hs01595312_g1  |
| <i>EGLN3</i>       | egl-9 family hypoxia inducible factor 3                          | 2.0                                    | EMT/Hypoxia                             | Hs00222966_m1  |
| <i>GABRA1</i>      | gamma-aminobutyric acid type A receptor alpha1 subunit           | -7.3                                   | Neurosensory                            | Hs00971228_m1  |
| <i>GAPDH</i>       | glyceraldehyde-3-phosphate dehydrogenase                         | -                                      | Aux. housekeeping control               | Hs99999905_m1  |
| <i>GAPDH</i>       | glyceraldehyde-3-phosphate dehydrogenase                         | -                                      | Main housekeeping control               | Hs03929097_g1  |
| <i>GLDN</i>        | gliomedin                                                        | -18.5                                  | Neurosensory                            | Hs00738960_m1  |
| <i>HIF1A</i>       | hypoxia inducible factor 1 subunit alpha                         | 1.4                                    | EMT/Hypoxia                             | Hs00153153_m1  |
| <i>HPGDS</i>       | hematopoietic prostaglandin D synthase                           | 1.8                                    | Mast cell                               | Hs00183950_m1  |
| <i>IL13</i>        | interleukin 13                                                   | 4.7                                    | Cytokine/Chemokine                      | Hs99999038_m1  |
| <i>IL13RA2</i>     | interleukin 13 receptor subunit alpha 2                          | 9.6                                    | Cytokine/Chemokine                      | Hs00152924_m1  |
| <i>IL17A</i>       | interleukin 17A                                                  | 1.3                                    | Cytokine/Chemokine                      | Hs00174383_m1  |
| <i>IL1RL1</i>      | interleukin 1 receptor like 1                                    | 2.1                                    | Cytokine/Chemokine                      | Hs00249384_m1  |
| <i>IL33</i>        | interleukin 33                                                   | -2.0                                   | Cytokine/Chemokine                      | Hs04931857_m1  |
| <i>IL4</i>         | interleukin 4                                                    | 1.9                                    | Cytokine/Chemokine                      | Hs00174122_m1  |

|                |                                                     |       |                       |               |
|----------------|-----------------------------------------------------|-------|-----------------------|---------------|
| <i>IL5</i>     | interleukin 5                                       | 12.8  | Cytokine/Chemokine    | Hs00174200_m1 |
| <i>IL5RA</i>   | interleukin 5 receptor subunit alpha                | 1.1   | Eosinophil            | Hs00236871_m1 |
| <i>ITLN1</i>   | intelectin 1                                        | 6.2   | Other                 | Hs00914745_m1 |
| <i>KLK7</i>    | kallikrein related peptidase 7                      | 11.0  | Antimicrobial defense | Hs00192503_m1 |
| <i>MADCAM1</i> | mucosal vascular addressin cell adhesion molecule 1 | -1.5  | Cell adhesion         | Hs00175533_m1 |
| <i>MUC4</i>    | mucin 4, cell surface associated                    | 7.3   | Epithelium-related    | Hs00366414_m1 |
| <i>NCF2</i>    | neutrophil cytosolic factor 2                       | 1.5   | Neutrophil            | Hs00166416_m1 |
| <i>NPY</i>     | neuropeptide Y                                      | -38.3 | Neurosensory          | Hs00173470_m1 |
| <i>PGA4</i>    | pepsinogen 4, group I pepsinogen A                  | -1.2  | Stomach-related       | Hs01029048_m1 |
| <i>S100G</i>   | S100 calcium binding protein G                      | -7.8  | Ion transportation    | Hs00187854_m1 |
| <i>SLC26A7</i> | solute carrier family 26 member 7                   | -4.6  | Ion transportation    | Hs01104163_m1 |
| <i>SST</i>     | somatostatin                                        | -14.4 | Stomach-related       | Hs00356144_m1 |
| <i>TAC1</i>    | tachykinin precursor 1                              | -11.6 | Neurosensory          | Hs00243225_m1 |
| <i>TCN1</i>    | transcobalamin 1                                    | 3.1   | Stomach-related       | Hs01055538_m1 |
| <i>TGFBR1</i>  | transforming growth factor beta receptor 1          | -1.1  | EMT/Hypoxia           | Hs00610320_m1 |

*EG*, eosinophilic gastritis; *EGDP*, eosinophilic gastritis diagnostic panel; *EMT*, epithelial-mesenchymal transition.

**Supplementary Table 2.** Definitions of EG histologic features

| <b>Features</b>                          | <b>Definition</b>                                                                                                                           | <b>Mild/moderate</b>                                                   | <b>Marked</b>                                                       |
|------------------------------------------|---------------------------------------------------------------------------------------------------------------------------------------------|------------------------------------------------------------------------|---------------------------------------------------------------------|
| Lamina propria eosinophil sheets         | Contiguous eosinophils that form masses in the lamina propria and may increase interglandular distance                                      | Contiguous eosinophil masses without increased interglandular distance | Contiguous eosinophil masses with increased interglandular distance |
| Periglandular circumferential collars    | At least one layer of eosinophils that surround $\geq 3/4$ of circumference of gland cut in cross section, or entire base of a gland cut    | Single layer of eosinophils forms collar                               | More than 1 layer of eosinophils forms collar                       |
| Eosinophils in surface epithelium        | Eosinophils in surface epithelium                                                                                                           | 1-5 eosinophils/HPF                                                    | >5 eosinophils/HPF or a group of eosinophils of any size            |
| Eosinophil glandulitis                   | Eosinophils in glandular epithelium, $\pm$ eosinophils in lumen                                                                             | 1-5 eosinophils/HPF                                                    | >5 eosinophils/HPF or a group of eosinophils of any size            |
| Eosinophil gland abscess                 | Dilated gland lined by attenuated epithelium with eosinophils in periglandular lamina propria, gland epithelium, and gland lumen            | $\leq 10\%$ of glands                                                  | >10% of glands                                                      |
| Eosinophils in muscularis mucosa         |                                                                                                                                             | Found in $\leq 5$ HPF                                                  | Found in >5 HPF                                                     |
| Lamina propria fibroplasia               | Acellular pink fibrous tissue in lamina propria                                                                                             | Found in $\leq 5$ HPF                                                  | Found in >5 HPF                                                     |
| Lamina propria smooth muscle hyperplasia | Strands of smooth muscle perpendicular to the lumen                                                                                         | Found in $\leq 5$ HPF                                                  | Found in >5 HPF                                                     |
| Reactive epithelial changes              | reduced mucin, increased nuclear:cytoplasmic ratio, increased mitotic activity, apoptosis, intestinal metaplasia, etc.                      | Found in $\leq 5$ HPF                                                  | Found in >5 HPF                                                     |
| Acute inflammatory cells                 | Acute inflammatory cells in lamina propria and/or intraepithelial                                                                           | Found in $\leq 5$ HPF                                                  | Found in >5 HPF                                                     |
| Surface erosion/ulceration               | Denuded surface with fibrin deposits in denuded area, with or without lamina propria acute inflammation, necrosis, granulation tissue, etc. | Found in $\leq 5$ HPF                                                  | Found in >5 HPF                                                     |

*HPF*, high-power field.



**Supplementary Table 3.** Screening of differentially expressed gene sets for EGDP\*

| Fold-change cut-off | Statistical cut-off |               |               |
|---------------------|---------------------|---------------|---------------|
|                     | None                | FDR $P < .05$ | FDR $P < .01$ |
| None                | 48                  | 31            | 25            |
| 2 fold              | 36                  | 31            | 25            |
| 5 fold              | 23                  | 21            | 19            |
| 10 fold             | 20                  | 19            | 18            |

\*Number of genes that pass various filter cut-offs following comparison of the expression level of all genes between non-EG controls (n = 12) and patients with active EG (n = 9). *EG*, eosinophilic gastritis; *EGDP*, eosinophilic gastritis diagnostic panel; *FDR*, false-discovery rate.

**Supplementary Table 4.** Spearman correlations between EG diagnostic parameters and a diagnostic subset of the EG transcriptome

| Representative Functionality | EGDP Genes     | Gastric Peak Eosinophil Counts | Histologic Severity | Endoscopic Severity |
|------------------------------|----------------|--------------------------------|---------------------|---------------------|
| Antimicrobial defense        | <i>DEFB1</i>   | -0.49                          | <b>-0.48</b>        | <b>-0.39</b>        |
| Antimicrobial defense        | <i>KLK7</i>    | 0.30                           | 0.36                | 0.28                |
| Cell adhesion                | <i>CDH26</i>   | <b>0.59</b>                    | <b>0.52</b>         | 0.29                |
| Cell adhesion                | <i>MADCAM1</i> | -0.10                          | -0.12               | -0.07               |
| Cytokine/Chemokine           | <i>CCL11</i>   | 0.21                           | 0.17                | 0.14                |
| Cytokine/Chemokine           | <i>CCL18</i>   | <b>0.58</b>                    | 0.46                | 0.20                |
| Cytokine/Chemokine           | <i>CCL24</i>   | 0.32                           | 0.34                | 0.20                |
| Cytokine/Chemokine           | <i>CCL26</i>   | <b>0.76</b>                    | <b>0.69</b>         | <b>0.44</b>         |
| Cytokine/Chemokine           | <i>IL13</i>    | 0.30                           | 0.40                | <b>0.34</b>         |
| Cytokine/Chemokine           | <i>IL13RA2</i> | <b>0.67</b>                    | <b>0.64</b>         | <b>0.41</b>         |
| Cytokine/Chemokine           | <i>IL17A</i>   | 0.21                           | 0.09                | 0.11                |
| Cytokine/Chemokine           | <i>IL1RL1</i>  | 0.33                           | 0.32                | 0.30                |
| Cytokine/Chemokine           | <i>IL33</i>    | -0.39                          | -0.37               | -0.22               |
| Cytokine/Chemokine           | <i>IL4</i>     | 0.27                           | 0.24                | 0.23                |
| Cytokine/Chemokine           | <i>IL5</i>     | <b>0.62</b>                    | <b>0.54</b>         | <b>0.39</b>         |
| EMT/Hypoxia                  | <i>EGLN3</i>   | 0.35                           | 0.30                | 0.12                |
| EMT/Hypoxia                  | <i>HIF1A</i>   | 0.18                           | 0.21                | 0.15                |
| EMT/Hypoxia                  | <i>TGFBR1</i>  | -0.19                          | -0.10               | -0.05               |
| Eosinophil                   | <i>CCR3</i>    | 0.34                           | 0.29                | -0.02               |
| Eosinophil                   | <i>CLC</i>     | <b>0.71</b>                    | <b>0.59</b>         | <b>0.35</b>         |
| Eosinophil                   | <i>IL5RA</i>   | 0.05                           | 0.07                | 0.05                |
| Epithelium-related           | <i>ACPP</i>    | 0.03                           | 0.00                | 0.13                |
| Epithelium-related           | <i>MUC4</i>    | 0.53                           | 0.45                | 0.17                |
| Fibrosis                     | <i>AREG</i>    | 0.06                           | 0.03                | 0.05                |
| Fibrosis                     | <i>BMP3</i>    | <b>-0.63</b>                   | <b>-0.55</b>        | -0.27               |
| Fibrosis                     | <i>COL2A1</i>  | -0.32                          | -0.31               | -0.17               |
| Inflammatory response        | <i>ANXA1</i>   | 0.52                           | <b>0.49</b>         | 0.28                |

|                       |                |              |              |              |
|-----------------------|----------------|--------------|--------------|--------------|
| Inflammatory response | <i>DUOX2</i>   | 0.42         | 0.32         | 0.14         |
| Inflammatory response | <i>DUOXA2</i>  | 0.19         | 0.17         | 0.08         |
| Ion transportation    | <i>S100G</i>   | -0.15        | -0.08        | -0.19        |
| Ion transportation    | <i>SLC26A7</i> | -0.37        | -0.34        | -0.15        |
| Mast cell             | <i>CPA3</i>    | 0.46         | 0.40         | 0.20         |
| Mast cell             | <i>HPGDS</i>   | <b>0.53</b>  | 0.45         | 0.26         |
| Neurosensory          | <i>GABRA1</i>  | -0.52        | -0.46        | <b>-0.39</b> |
| Neurosensory          | <i>GLDN</i>    | -0.50        | <b>-0.50</b> | <b>-0.43</b> |
| Neurosensory          | <i>NPY</i>     | <b>-0.56</b> | -0.45        | -0.28        |
| Neurosensory          | <i>TAC1</i>    | -0.35        | -0.34        | <b>-0.35</b> |
| Neutrophil            | <i>CXCL8</i>   | 0.28         | 0.23         | 0.18         |
| Neutrophil            | <i>NCF2</i>    | 0.24         | 0.25         | 0.16         |
| Other                 | <i>CHIA</i>    | -0.04        | -0.05        | 0.04         |
| Other                 | <i>ITLNI</i>   | 0.42         | 0.33         | 0.16         |
| Stomach-related       | <i>ATP4A</i>   | -0.35        | -0.34        | -0.17        |
| Stomach-related       | <i>CCK</i>     | 0.14         | 0.05         | -0.07        |
| Stomach-related       | <i>PGA4</i>    | -0.16        | -0.15        | -0.04        |
| Stomach-related       | <i>SST</i>     | <b>-0.53</b> | <b>-0.55</b> | <b>-0.40</b> |
| Stomach-related       | <i>TCNI</i>    | 0.46         | 0.36         | 0.07         |

---

Correlations by functional groupings of genes are shown. The text within the cell indicates the Spearman r value. Values in boldface indicate the top 10 genes with nominal statistical significance ( $P < .05$ ). *EG*, eosinophilic gastritis; *EGDP*, eosinophilic gastritis diagnostic panel; *EMT*, epithelial-mesenchymal transition.

**Supplementary Table 5.** Spearman correlations between EG histologic features and a diagnostic subset of the EG transcriptome

| Representative Functionality | EGDP Genes     | AIC   | EoGA  | SEU   | LPF   | EoM         | LPSMH        | EoG          | LPES         | PCC          | EoSE         | REC          |
|------------------------------|----------------|-------|-------|-------|-------|-------------|--------------|--------------|--------------|--------------|--------------|--------------|
| Antimicrobial defense        | <i>DEFB1</i>   | -0.01 | -0.15 | -0.15 | 0.02  | -0.19       | -0.19        | <b>-0.50</b> | <b>-0.55</b> | <b>-0.59</b> | <b>-0.46</b> | <b>-0.51</b> |
| Antimicrobial defense        | <i>KLK7</i>    | 0.15  | 0.07  | 0.07  | 0.15  | 0.07        | <b>0.32</b>  | <b>0.37</b>  | 0.28         | <b>0.40</b>  | <b>0.34</b>  | 0.25         |
| Cell adhesion                | <i>CDH26</i>   | 0.00  | 0.16  | 0.16  | 0.14  | 0.22        | <b>0.40</b>  | <b>0.48</b>  | <b>0.60</b>  | <b>0.59</b>  | <b>0.39</b>  | <b>0.41</b>  |
| Cell adhesion                | <i>MADCAM1</i> | -0.02 | 0.01  | 0.01  | -0.02 | 0.09        | -0.12        | -0.07        | -0.12        | -0.12        | -0.02        | -0.11        |
| Cytokine/Chemokine           | <i>CCL11</i>   | -0.13 | 0.07  | 0.07  | 0.00  | 0.28        | -0.01        | 0.15         | 0.14         | 0.15         | 0.09         | 0.18         |
| Cytokine/Chemokine           | <i>CCL18</i>   | -0.02 | 0.15  | 0.15  | -0.03 | 0.30        | 0.28         | <b>0.47</b>  | <b>0.51</b>  | <b>0.52</b>  | 0.30         | <b>0.42</b>  |
| Cytokine/Chemokine           | <i>CCL24</i>   | 0.15  | 0.13  | 0.13  | 0.13  | 0.24        | 0.16         | <b>0.35</b>  | <b>0.39</b>  | <b>0.43</b>  | <b>0.31</b>  | 0.26         |
| Cytokine/Chemokine           | <i>CCL26</i>   | 0.14  | 0.16  | 0.16  | 0.06  | <b>0.38</b> | <b>0.41</b>  | <b>0.68</b>  | <b>0.67</b>  | <b>0.74</b>  | <b>0.57</b>  | <b>0.62</b>  |
| Cytokine/Chemokine           | <i>IL13</i>    | -0.12 | 0.14  | 0.14  | 0.20  | 0.08        | 0.30         | <b>0.38</b>  | <b>0.35</b>  | <b>0.37</b>  | <b>0.44</b>  | <b>0.31</b>  |
| Cytokine/Chemokine           | <i>IL13RA2</i> | 0.01  | 0.14  | 0.14  | 0.04  | 0.19        | <b>0.52</b>  | <b>0.57</b>  | <b>0.67</b>  | <b>0.67</b>  | <b>0.46</b>  | <b>0.53</b>  |
| Cytokine/Chemokine           | <i>IL17A</i>   | -0.02 | -0.15 | -0.15 | -0.16 | 0.15        | -0.03        | 0.17         | 0.11         | 0.13         | 0.16         | 0.17         |
| Cytokine/Chemokine           | <i>IL1RL1</i>  | -0.08 | 0.13  | 0.13  | 0.07  | 0.26        | 0.07         | <b>0.38</b>  | <b>0.40</b>  | <b>0.41</b>  | <b>0.37</b>  | 0.30         |
| Cytokine/Chemokine           | <i>IL33</i>    | -0.19 | -0.15 | -0.15 | -0.10 | -0.01       | <b>-0.34</b> | <b>-0.33</b> | <b>-0.40</b> | <b>-0.42</b> | -0.26        | -0.25        |
| Cytokine/Chemokine           | <i>IL4</i>     | -0.22 | 0.14  | 0.14  | 0.02  | 0.12        | 0.08         | 0.29         | 0.26         | 0.23         | 0.18         | 0.16         |
| Cytokine/Chemokine           | <i>IL5</i>     | -0.03 | 0.15  | 0.15  | 0.00  | 0.25        | <b>0.39</b>  | <b>0.61</b>  | <b>0.61</b>  | <b>0.64</b>  | <b>0.53</b>  | <b>0.47</b>  |
| EMT/Hypoxia                  | <i>EGLN3</i>   | -0.08 | 0.14  | 0.14  | 0.08  | 0.15        | 0.26         | 0.25         | <b>0.36</b>  | <b>0.37</b>  | 0.20         | 0.21         |
| EMT/Hypoxia                  | <i>HIF1A</i>   | -0.10 | 0.06  | 0.06  | 0.08  | 0.19        | 0.10         | 0.17         | 0.16         | 0.18         | 0.19         | 0.14         |
| EMT/Hypoxia                  | <i>TGFBR1</i>  | -0.08 | -0.09 | -0.09 | 0.11  | 0.20        | -0.16        | -0.11        | -0.14        | -0.16        | -0.05        | -0.12        |
| Eosinophil                   | <i>CCR3</i>    | -0.10 | 0.10  | 0.10  | 0.06  | 0.08        | 0.22         | <b>0.36</b>  | <b>0.33</b>  | <b>0.35</b>  | 0.22         | 0.16         |
| Eosinophil                   | <i>CLC</i>     | -0.02 | 0.15  | 0.15  | 0.04  | 0.29        | 0.27         | <b>0.62</b>  | <b>0.59</b>  | <b>0.64</b>  | <b>0.47</b>  | <b>0.56</b>  |
| Eosinophil                   | <i>IL5RA</i>   | 0.04  | 0.06  | 0.06  | 0.13  | 0.01        | 0.02         | 0.14         | 0.13         | 0.06         | -0.01        | 0.03         |
| Epithelium-related           | <i>ACPP</i>    | 0.00  | -0.09 | -0.09 | 0.08  | 0.03        | -0.04        | 0.06         | -0.02        | -0.04        | -0.03        | 0.02         |
| Epithelium-related           | <i>MUC4</i>    | 0.19  | 0.08  | 0.08  | 0.13  | 0.16        | <b>0.35</b>  | <b>0.45</b>  | <b>0.50</b>  | <b>0.52</b>  | <b>0.36</b>  | <b>0.31</b>  |
| Fibrosis                     | <i>AREG</i>    | -0.05 | 0.03  | 0.03  | 0.00  | -0.04       | 0.13         | 0.02         | -0.01        | -0.03        | -0.06        | -0.01        |
| Fibrosis                     | <i>BMP3</i>    | -0.10 | -0.10 | -0.10 | -0.01 | -0.24       | <b>-0.40</b> | <b>-0.55</b> | <b>-0.57</b> | <b>-0.64</b> | <b>-0.48</b> | <b>-0.46</b> |
| Fibrosis                     | <i>COL2A1</i>  | -0.21 | -0.15 | -0.15 | -0.08 | -0.05       | <b>-0.31</b> | -0.24        | <b>-0.32</b> | <b>-0.34</b> | -0.22        | -0.21        |
| Inflammatory response        | <i>ANXA1</i>   | 0.11  | 0.10  | 0.10  | 0.06  | 0.23        | <b>0.45</b>  | <b>0.39</b>  | <b>0.44</b>  | <b>0.46</b>  | <b>0.34</b>  | <b>0.38</b>  |
| Inflammatory response        | <i>DUOX2</i>   | -0.07 | 0.11  | 0.11  | 0.04  | <b>0.32</b> | 0.18         | <b>0.34</b>  | <b>0.38</b>  | <b>0.37</b>  | 0.20         | 0.20         |
| Inflammatory response        | <i>DUOX2</i>   | -0.01 | 0.14  | 0.14  | 0.09  | <b>0.32</b> | -0.01        | 0.21         | 0.20         | 0.19         | 0.13         | 0.10         |
| Ion transportation           | <i>S100G</i>   | -0.16 | -0.15 | -0.15 | 0.06  | 0.01        | 0.01         | -0.06        | -0.12        | -0.09        | -0.25        | -0.19        |
| Ion transportation           | <i>SLC26A7</i> | -0.13 | -0.14 | -0.14 | -0.04 | -0.04       | <b>-0.36</b> | <b>-0.33</b> | <b>-0.40</b> | <b>-0.42</b> | -0.24        | -0.21        |
| Mast cell                    | <i>CPA3</i>    | -0.04 | 0.00  | 0.00  | -0.01 | 0.24        | 0.19         | <b>0.40</b>  | <b>0.39</b>  | <b>0.43</b>  | 0.30         | <b>0.38</b>  |
| Mast cell                    | <i>HPGDS</i>   | -0.01 | 0.09  | 0.08  | 0.08  | 0.28        | 0.19         | <b>0.43</b>  | <b>0.45</b>  | <b>0.49</b>  | <b>0.36</b>  | <b>0.42</b>  |

|                 |               |       |       |       |       |       |              |              |              |              |              |              |
|-----------------|---------------|-------|-------|-------|-------|-------|--------------|--------------|--------------|--------------|--------------|--------------|
| Neurosensory    | <i>GABRA1</i> | -0.12 | -0.14 | -0.14 | 0.04  | -0.10 | -0.27        | <b>-0.44</b> | <b>-0.49</b> | <b>-0.50</b> | <b>-0.41</b> | <b>-0.49</b> |
| Neurosensory    | <i>GLDN</i>   | -0.08 | -0.12 | -0.12 | 0.01  | -0.10 | -0.28        | <b>-0.57</b> | <b>-0.59</b> | <b>-0.62</b> | <b>-0.57</b> | <b>-0.51</b> |
| Neurosensory    | <i>NPY</i>    | -0.11 | -0.16 | -0.16 | -0.11 | -0.06 | -0.23        | <b>-0.43</b> | <b>-0.55</b> | <b>-0.59</b> | <b>-0.39</b> | <b>-0.43</b> |
| Neurosensory    | <i>TAC1</i>   | -0.02 | -0.08 | -0.08 | -0.06 | -0.11 | -0.11        | <b>-0.40</b> | <b>-0.35</b> | <b>-0.39</b> | <b>-0.38</b> | <b>-0.38</b> |
| Neutrophil      | <i>CXCL8</i>  | 0.27  | 0.09  | 0.09  | 0.05  | 0.24  | 0.15         | 0.22         | 0.18         | 0.22         | 0.24         | 0.17         |
| Neutrophil      | <i>NCF2</i>   | 0.18  | -0.10 | -0.10 | 0.08  | 0.29  | 0.09         | <b>0.30</b>  | 0.27         | 0.25         | 0.21         | 0.25         |
| Other           | <i>CHIA</i>   | -0.14 | -0.15 | -0.15 | -0.12 | 0.06  | -0.08        | 0.03         | -0.09        | -0.09        | -0.01        | -0.02        |
| Other           | <i>ITLN1</i>  | -0.25 | 0.14  | 0.14  | -0.07 | 0.11  | 0.16         | <b>0.40</b>  | <b>0.45</b>  | <b>0.47</b>  | <b>0.33</b>  | <b>0.33</b>  |
| Stomach-related | <i>ATP4A</i>  | -0.11 | -0.10 | -0.10 | -0.05 | -0.01 | <b>-0.36</b> | -0.28        | <b>-0.37</b> | <b>-0.37</b> | -0.24        | -0.25        |
| Stomach-related | <i>CCK</i>    | -0.02 | 0.12  | 0.12  | 0.02  | 0.16  | 0.10         | 0.02         | 0.01         | 0.04         | 0.00         | -0.03        |
| Stomach-related | <i>PGA4</i>   | -0.15 | -0.02 | -0.02 | -0.04 | 0.04  | -0.24        | -0.06        | -0.14        | -0.14        | -0.03        | -0.07        |
| Stomach-related | <i>SST</i>    | -0.09 | -0.14 | -0.14 | -0.06 | -0.12 | -0.29        | <b>-0.53</b> | <b>-0.56</b> | <b>-0.60</b> | <b>-0.52</b> | <b>-0.57</b> |
| Stomach-related | <i>TCNI</i>   | 0.01  | 0.14  | 0.14  | 0.00  | 0.26  | 0.26         | <b>0.34</b>  | <b>0.39</b>  | <b>0.41</b>  | 0.20         | <b>0.30</b>  |

Correlations by functional groupings of genes are shown. The text within the cell indicates the Spearman r value. Values in boldface indicate absolute Spearman r > 0.3 with nominal statistical significance ( $P < .05$ ). Red shading indicates positive correlations, whereas blue shading indicates negative correlations. *EG*, eosinophilic gastritis; *EGDP*, eosinophilic gastritis diagnostic panel; *EMT*, epithelial-mesenchymal transition; *AIC*, acute inflammatory cells; *EoG*, eosinophil glandulitis; *EoGA*, eosinophil gland abscess; *EoM*, eosinophils in muscularis; *EoSE*, eosinophils in surface epithelium; *LPES*, lamina propria eosinophil sheets; *LPF*, lamina propria fibroplasia; *LPSMH*, lamina propria smooth muscle hyperplasia; *PCC*, periglandular circumferential collars; *REC*, reactive epithelial changes; *SEU*, surface erosion/ulceration.

**Supplementary Table 6.** Spearman correlations between EG endoscopic features and a diagnostic subset of the EG transcriptome

| Representative Functionality | EGDP Genes     | Nodularity   | Granularity  | Folds       | Friability Bleeding | Erythema     | Erosion Ulceration |
|------------------------------|----------------|--------------|--------------|-------------|---------------------|--------------|--------------------|
| Antimicrobial defense        | <i>DEFB1</i>   | <b>-0.41</b> | <b>-0.38</b> | -0.26       | -0.18               | -0.10        | 0.00               |
| Antimicrobial defense        | <i>KLK7</i>    | 0.17         | 0.21         | 0.26        | 0.17                | 0.22         | 0.15               |
| Cell adhesion                | <i>CDH26</i>   | <b>0.45</b>  | <b>0.49</b>  | <b>0.35</b> | <b>0.31</b>         | 0.28         | 0.23               |
| Cell adhesion                | <i>MADCAM1</i> | -0.14        | -0.07        | -0.15       | -0.12               | -0.12        | -0.09              |
| Cytokine/Chemokine           | <i>CCL11</i>   | -0.09        | -0.18        | 0.02        | <b>-0.30</b>        | -0.10        | -0.16              |
| Cytokine/Chemokine           | <i>CCL18</i>   | <b>0.44</b>  | <b>0.38</b>  | 0.25        | 0.24                | 0.11         | -0.02              |
| Cytokine/Chemokine           | <i>CCL24</i>   | <b>0.48</b>  | <b>0.49</b>  | <b>0.30</b> | 0.15                | 0.22         | 0.06               |
| Cytokine/Chemokine           | <i>CCL26</i>   | <b>0.55</b>  | <b>0.53</b>  | <b>0.39</b> | <b>0.30</b>         | <b>0.36</b>  | 0.13               |
| Cytokine/Chemokine           | <i>IL13</i>    | 0.19         | 0.26         | 0.20        | 0.02                | 0.05         | 0.05               |
| Cytokine/Chemokine           | <i>IL13RA2</i> | <b>0.49</b>  | <b>0.51</b>  | <b>0.31</b> | <b>0.32</b>         | 0.24         | 0.14               |
| Cytokine/Chemokine           | <i>IL17A</i>   | 0.11         | 0.02         | 0.08        | -0.02               | -0.27        | 0.05               |
| Cytokine/Chemokine           | <i>IL1RL1</i>  | <b>0.32</b>  | <b>0.30</b>  | 0.03        | 0.09                | -0.02        | -0.12              |
| Cytokine/Chemokine           | <i>IL33</i>    | <b>-0.36</b> | <b>-0.46</b> | -0.18       | <b>-0.39</b>        | <b>-0.41</b> | -0.24              |
| Cytokine/Chemokine           | <i>IL4</i>     | -0.15        | -0.16        | 0.01        | -0.16               | -0.23        | -0.06              |
| Cytokine/Chemokine           | <i>IL5</i>     | <b>0.47</b>  | <b>0.47</b>  | <b>0.33</b> | 0.21                | 0.17         | 0.17               |
| EMT/Hypoxia                  | <i>EGLN3</i>   | 0.26         | 0.28         | 0.15        | 0.26                | 0.20         | 0.00               |
| EMT/Hypoxia                  | <i>HIF1A</i>   | 0.11         | 0.04         | 0.26        | -0.08               | -0.06        | -0.14              |
| EMT/Hypoxia                  | <i>TGFBR1</i>  | -0.11        | -0.14        | -0.15       | -0.18               | -0.28        | -0.24              |
| Eosinophil                   | <i>CCR3</i>    | 0.23         | 0.20         | 0.15        | 0.19                | 0.10         | 0.11               |
| Eosinophil                   | <i>CLC</i>     | <b>0.40</b>  | <b>0.32</b>  | 0.29        | 0.17                | 0.12         | 0.05               |
| Eosinophil                   | <i>IL5RA</i>   | -0.06        | -0.10        | 0.05        | -0.16               | -0.01        | 0.01               |
| Epithelium-related           | <i>ACPP</i>    | -0.12        | -0.13        | -0.24       | <b>-0.34</b>        | -0.22        | -0.09              |
| Epithelium-related           | <i>MUC4</i>    | <b>0.46</b>  | <b>0.43</b>  | 0.27        | 0.22                | 0.26         | 0.19               |
| Fibrosis                     | <i>AREG</i>    | 0.03         | -0.02        | -0.09       | 0.13                | 0.18         | 0.00               |
| Fibrosis                     | <i>BMP3</i>    | <b>-0.42</b> | <b>-0.40</b> | -0.21       | -0.28               | <b>-0.32</b> | -0.19              |
| Fibrosis                     | <i>COL2A1</i>  | <b>-0.46</b> | <b>-0.38</b> | -0.25       | -0.29               | <b>-0.43</b> | -0.11              |
| Inflammatory response        | <i>ANXA1</i>   | <b>0.36</b>  | <b>0.35</b>  | 0.23        | <b>0.35</b>         | <b>0.35</b>  | 0.24               |
| Inflammatory response        | <i>DUOX2</i>   | <b>0.35</b>  | 0.27         | <b>0.32</b> | 0.14                | 0.04         | -0.05              |
| Inflammatory response        | <i>DUOX2</i>   | <b>0.35</b>  | 0.22         | 0.19        | 0.09                | 0.00         | -0.06              |
| Ion transportation           | <i>S100G</i>   | <b>-0.34</b> | <b>-0.35</b> | -0.18       | -0.20               | -0.21        | -0.02              |
| Ion transportation           | <i>SLC26A7</i> | <b>-0.41</b> | <b>-0.47</b> | -0.22       | <b>-0.38</b>        | <b>-0.38</b> | -0.22              |
| Mast cell                    | <i>CPA3</i>    | -0.08        | -0.04        | 0.19        | -0.13               | -0.02        | -0.03              |
| Mast cell                    | <i>HPGDS</i>   | 0.09         | 0.06         | 0.20        | -0.02               | 0.09         | 0.02               |

|                 |               |              |              |       |              |              |              |
|-----------------|---------------|--------------|--------------|-------|--------------|--------------|--------------|
| Neurosensory    | <i>GABRA1</i> | <b>-0.31</b> | <b>-0.33</b> | -0.25 | <b>-0.33</b> | <b>-0.35</b> | <b>-0.37</b> |
| Neurosensory    | <i>GLDN</i>   | <b>-0.35</b> | <b>-0.41</b> | -0.27 | -0.16        | -0.29        | -0.14        |
| Neurosensory    | <i>NPY</i>    | <b>-0.50</b> | <b>-0.41</b> | -0.20 | -0.30        | <b>-0.32</b> | -0.11        |
| Neurosensory    | <i>TAC1</i>   | <b>-0.30</b> | <b>-0.34</b> | -0.12 | -0.07        | -0.08        | -0.12        |
| Neutrophil      | <i>CXCL8</i>  | <b>0.46</b>  | <b>0.32</b>  | 0.08  | <b>0.39</b>  | 0.20         | 0.10         |
| Neutrophil      | <i>NCF2</i>   | 0.30         | 0.20         | 0.04  | 0.03         | 0.05         | -0.05        |
| Other           | <i>CHIA</i>   | <b>-0.34</b> | -0.29        | -0.16 | <b>-0.37</b> | -0.27        | -0.21        |
| Other           | <i>ITLN1</i>  | 0.04         | 0.05         | 0.24  | -0.07        | 0.01         | -0.08        |
| Stomach-related | <i>ATP4A</i>  | <b>-0.35</b> | <b>-0.39</b> | -0.19 | <b>-0.45</b> | <b>-0.33</b> | -0.15        |
| Stomach-related | <i>CCK</i>    | 0.14         | 0.12         | -0.11 | 0.17         | 0.06         | -0.15        |
| Stomach-related | <i>PGA4</i>   | -0.23        | -0.27        | -0.16 | <b>-0.34</b> | <b>-0.31</b> | -0.13        |
| Stomach-related | <i>SST</i>    | <b>-0.46</b> | <b>-0.38</b> | -0.28 | -0.19        | -0.30        | -0.18        |
| Stomach-related | <i>TCN1</i>   | 0.30         | 0.25         | 0.22  | 0.12         | 0.06         | -0.12        |

Correlations by functional groupings of genes are shown. The text within the cell indicates the Spearman r value. Values in boldface indicate absolute Spearman r > 0.3 with nominal statistical significance ( $P < .05$ ). Red shading indicates positive correlations, whereas blue shading indicates negative correlations. *EG*, eosinophilic gastritis; *EGDP*, eosinophilic gastritis diagnostic panel; *EMT*, epithelial-mesenchymal transition.

**Supplementary Table 7.** Circulating biomarker levels of non-EG and active EG groups

|               | Plasma         |                | Adjusted<br><i>P</i> value | Serum          |                | Adjusted<br><i>P</i> value |
|---------------|----------------|----------------|----------------------------|----------------|----------------|----------------------------|
|               | Non-EG         | Active EG      |                            | Non-EG         | Active EG      |                            |
| Eotaxin       | 629.2 ± 31.2   | 659.7 ± 76.8   | 5.2980                     | 169.3 ± 8.0    | 219.5 ± 25.3   | 1.5110                     |
| Eotaxin-2     | 1434.2 ± 160.1 | 1139.1 ± 173.6 | 9.2383                     | 2644.4 ± 380.9 | 2721.2 ± 484.8 | 5.7235                     |
| Eotaxin-3     | 103.6 ± 5.9    | 481.1 ± 175.6  | <b>&lt; 0.0001</b>         | 23.5 ± 2.4     | 738.0 ± 543.7  | <b>0.0024</b>              |
| IL-13         | 3.3 ± 0.2      | 3.7 ± 1        | 9.7238                     | 3.2 ± 0.3      | 2.7 ± 0.4      | 6.4881                     |
| IL-1 $\alpha$ | 0.1 ± 0        | 0.1 ± 0.1      | 7.4777                     | 0.4 ± 0.2      | 0.1 ± 0.1      | 0.0688                     |
| IL-33         | 1.9 ± 0.2      | 3.3 ± 1.1      | 0.6035                     | 0.9 ± 0.1      | 3.0 ± 0.9      | 0.1891                     |
| IL-4          | 0.1 ± 0        | 0.2 ± 0        | 3.4244                     | 0.1 ± 0        | 0.1 ± 0        | 0.4048                     |
| IL-5          | 0.7 ± 0.1      | 3.6 ± 1.3      | <b>0.0107</b>              | 0.6 ± 0.1      | 3.7 ± 1.1      | <b>0.0084</b>              |
| TARC          | 74.1 ± 5.1     | 135.3 ± 25.8   | <b>0.0050</b>              | 311.4 ± 34.7   | 603.4 ± 141.3  | 0.6132                     |
| TSLP          | 4.7 ± 0.3      | 7.8 ± 2.1      | 0.8648                     | 3.6 ± 0.3      | 8.0 ± 0.8      | <b>&lt; 0.0001</b>         |

Data are mean ± SEM. *EG*, eosinophilic gastritis; *FDR*, false-discovery rate; *SEM*, standard error of the mean; *TARC*, thymus- and activation-regulated chemokine; *TSLP*, thymic stromal lymphopoietin.



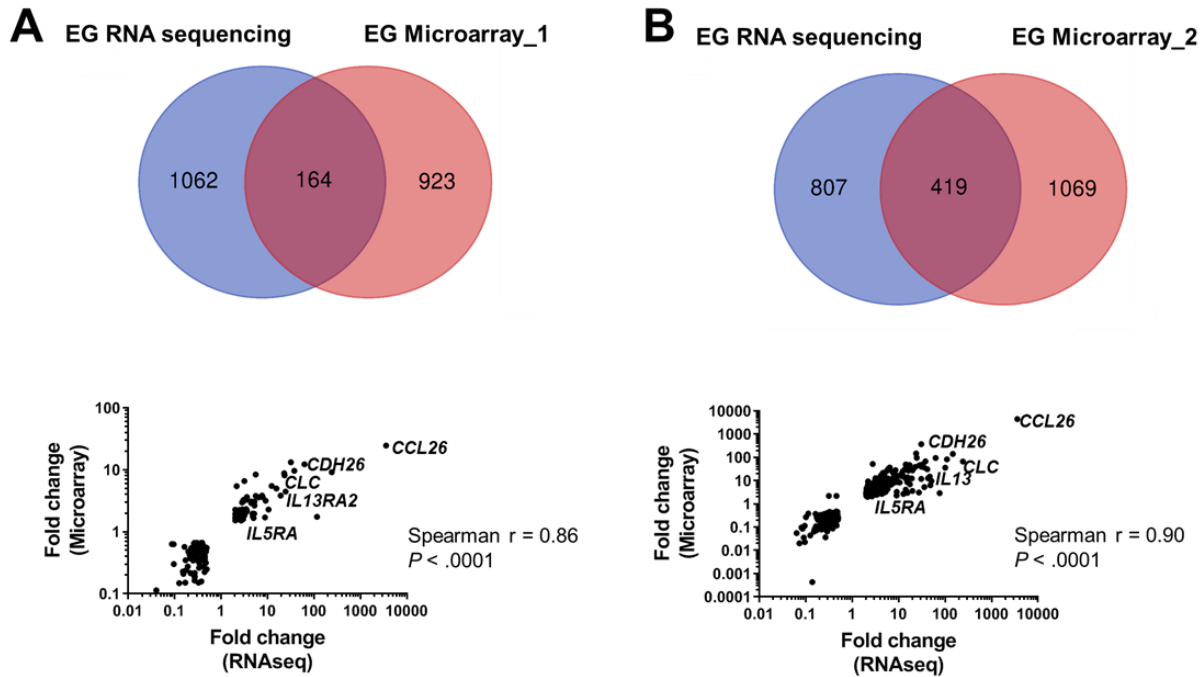

**Supplementary Figure 1.** Comparison between EG transcriptome genes identified by RNA sequencing and previously published microarray data. Venn diagrams comparing the number of genes identified as dysregulated in EG (FDR  $P < .05$ ,  $\geq 2$ -fold change) across different studies (A, Microarray\_1; B, Microarray\_2, *upper panels*). Spearman correlations comparing fold-change values for the overlapping genes identified as dysregulated by each datasets (A, Microarray\_1; B, Microarray\_2, *lower panels*). Microarray\_1 was from *J Allergy Clin Immunol.* 2014 and Microarray\_2 was from *J Allergy Clin Immunol Pract.* 2017. EG, eosinophilic gastritis; FDR, false-discovery rate.

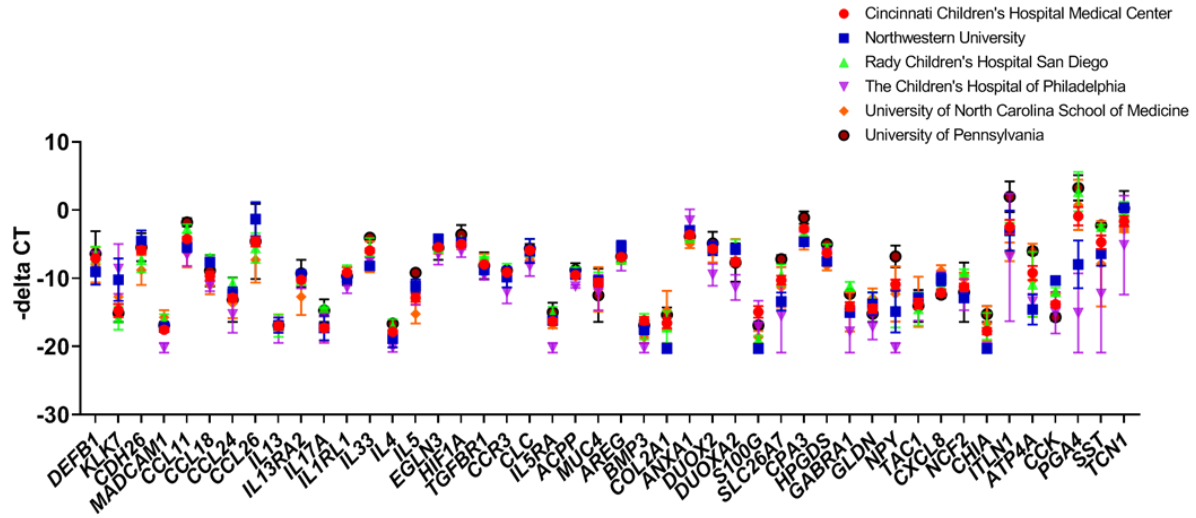

**Supplementary Figure 2.** EGDP performance across the sites in the discovery cohort. Distributions of individual gene expressions among patients with active EG from various sites were graphed. Data points represent median of subject data by site; error bars show interquartile range. *EG*, eosinophilic gastritis; *EGDP*, eosinophilic gastritis diagnostic panel.

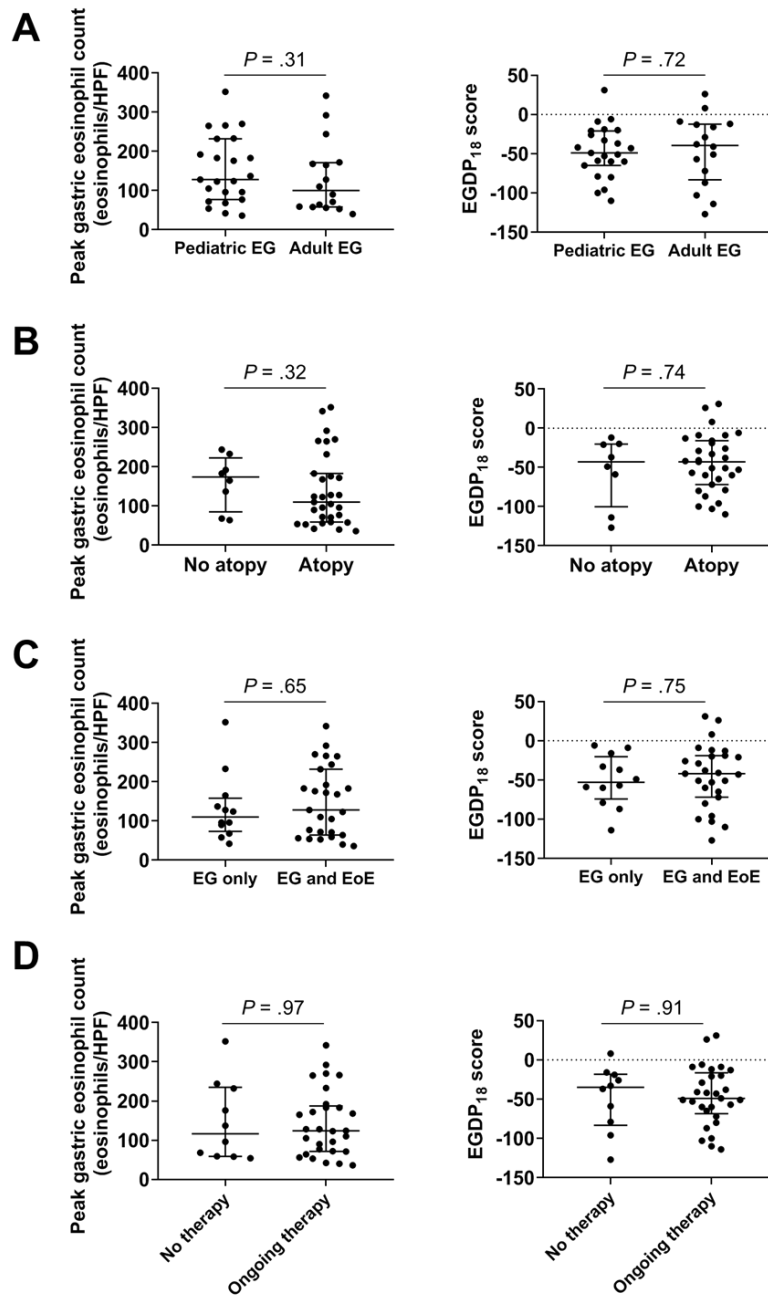

**Supplementary Figure 3.** Comparison of EGDP<sub>18</sub> score across clinically stratified patients with active EG. **A - D**, Comparison of peak gastric eosinophil counts (*left*) among patients with active EG when stratified by clinical characteristics (age, atopic status, co-existence of EoE, and treatment status at biopsy). Comparison of the EGDP<sub>18</sub> score (*right*) across age groups (pediatric vs. adult patients) (A), atopic status (atopy vs. no atopy) (B), co-existence of EoE (EG only vs. EG and EoE) (C), and treatment status at biopsy (ongoing therapy including diet and steroids vs. no therapy) (D). Line and error bars show the median and interquartile range, respectively. Data points represent individual subjects. *EG*, eosinophilic gastritis; *EGDP*, eosinophilic gastritis diagnostic panel; *EoE*, eosinophilic esophagitis.

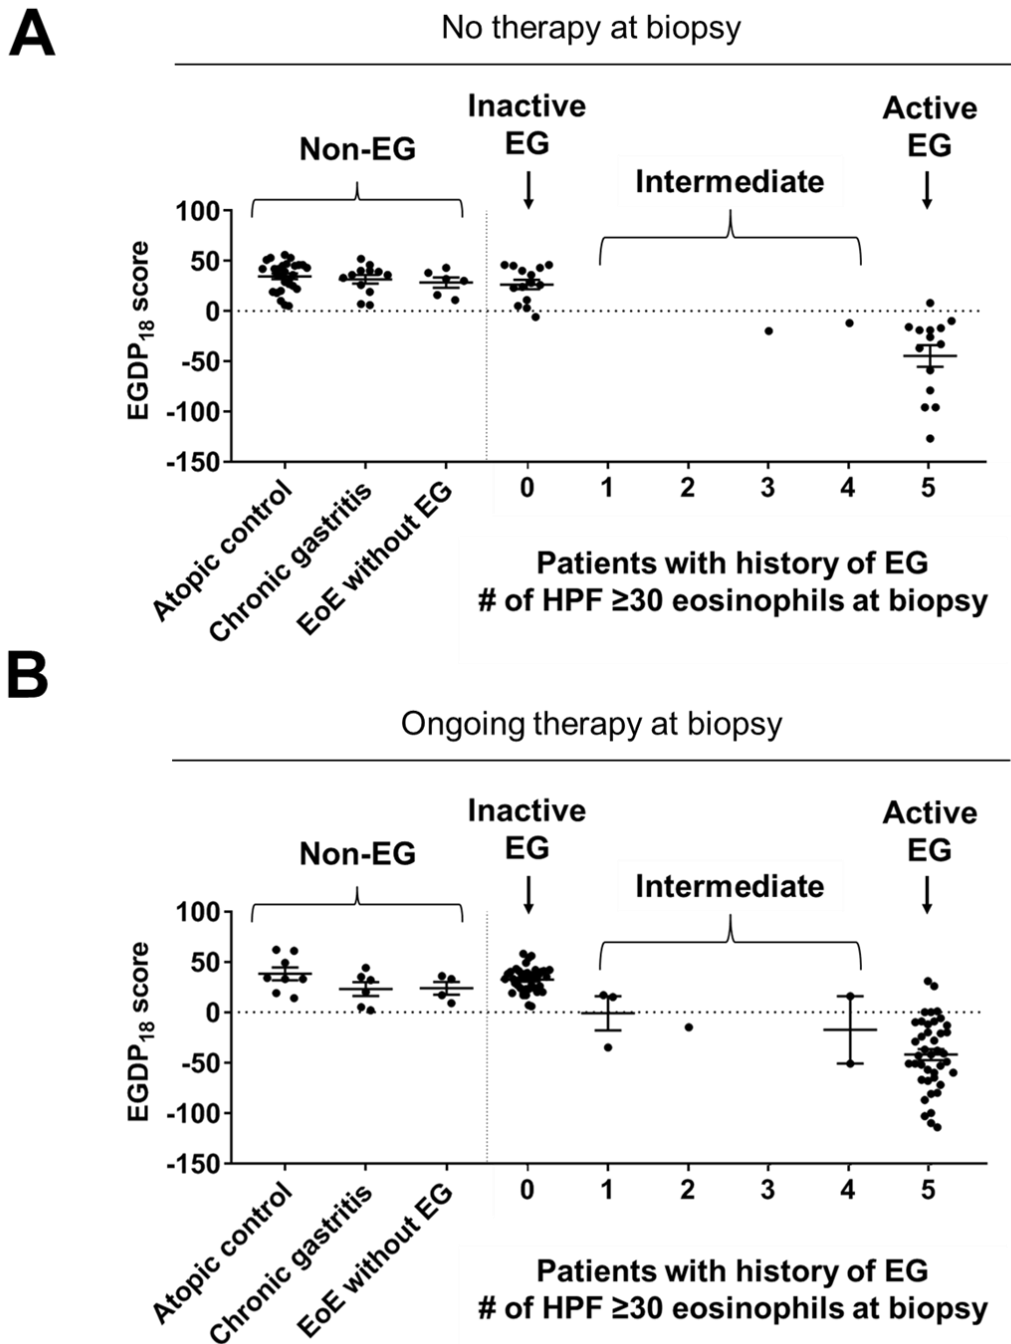

**Supplementary Figure 4.** EGDP<sub>18</sub> score as a function of patient groups stratified by the treatment status at biopsy (A, no therapy; B, ongoing therapy). Line and error bars show the median and interquartile range, respectively. Data points represent individual subjects. EG, eosinophilic gastritis; EGDP, eosinophilic gastritis diagnostic panel; EoE, eosinophilic esophagitis.

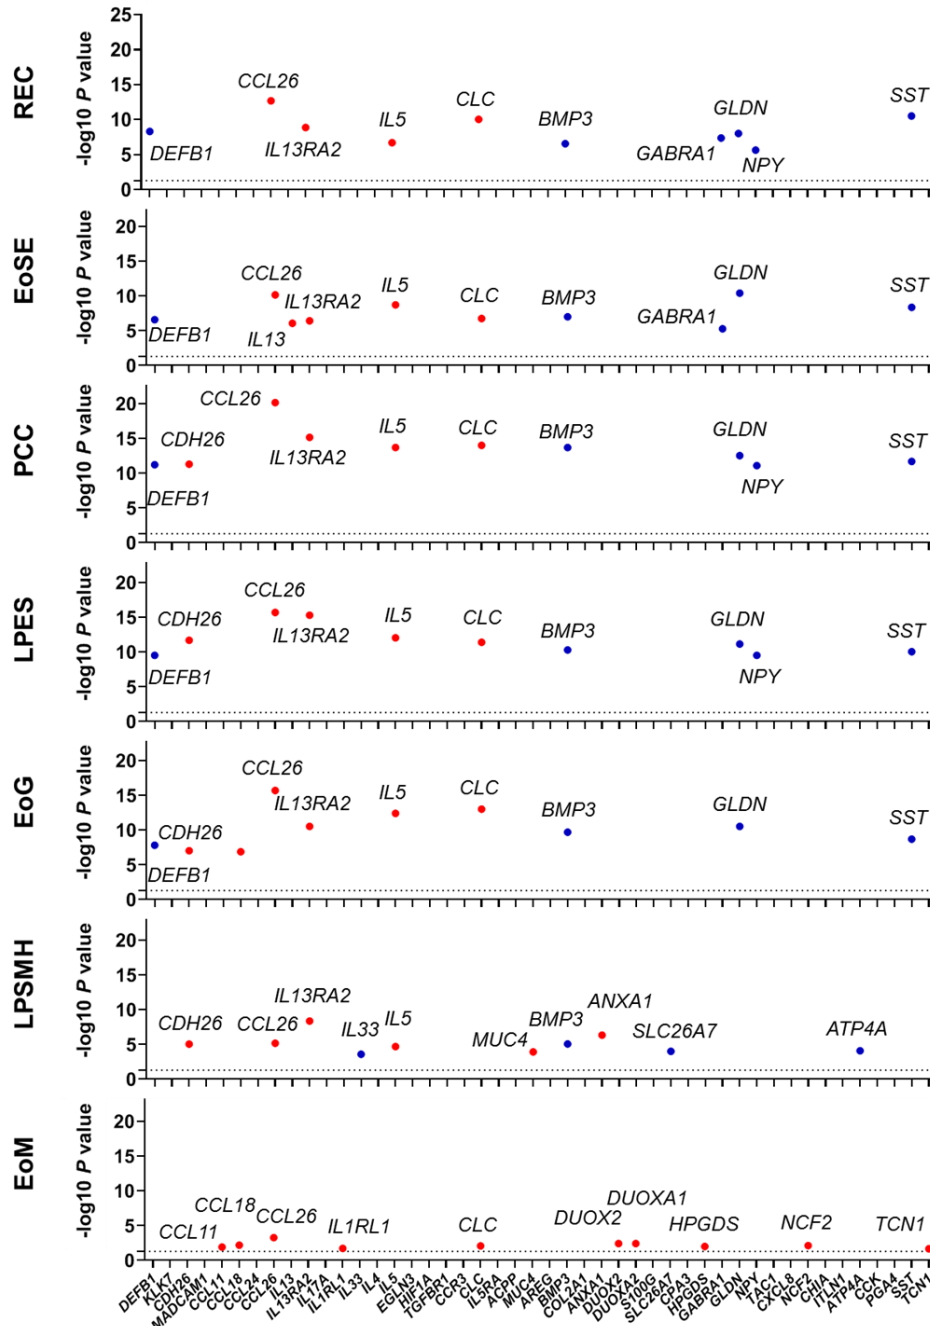

**Supplementary Figure 5.** Correlations between EG histologic features and a diagnostic subset of the EG transcriptome. The y axis represents the negative  $\log_{10} P$  value of the Spearman correlation between 7 eosinophilic gastritis (EG) histologic features and a diagnostic subset of genes from the EG transcriptome (eosinophilic gastritis diagnostic panel [EGDP]). The x axis represents the top 10 genes for each feature ( $P < .05$ ). A red dot indicates a positive correlation, and a blue dot indicates a negative correlation. The dashed line indicates  $P < .05$ . *EoG*, eosinophil glandulitis; *EoM*, eosinophils in muscularis mucosa; *EoSE*, eosinophils in surface epithelium; *LPES*, lamina propria eosinophil sheets; *LPSMH*, lamina propria smooth muscle hyperplasia; *PCC*, periglandular circumferential collars; *REC*, reactive epithelial changes.

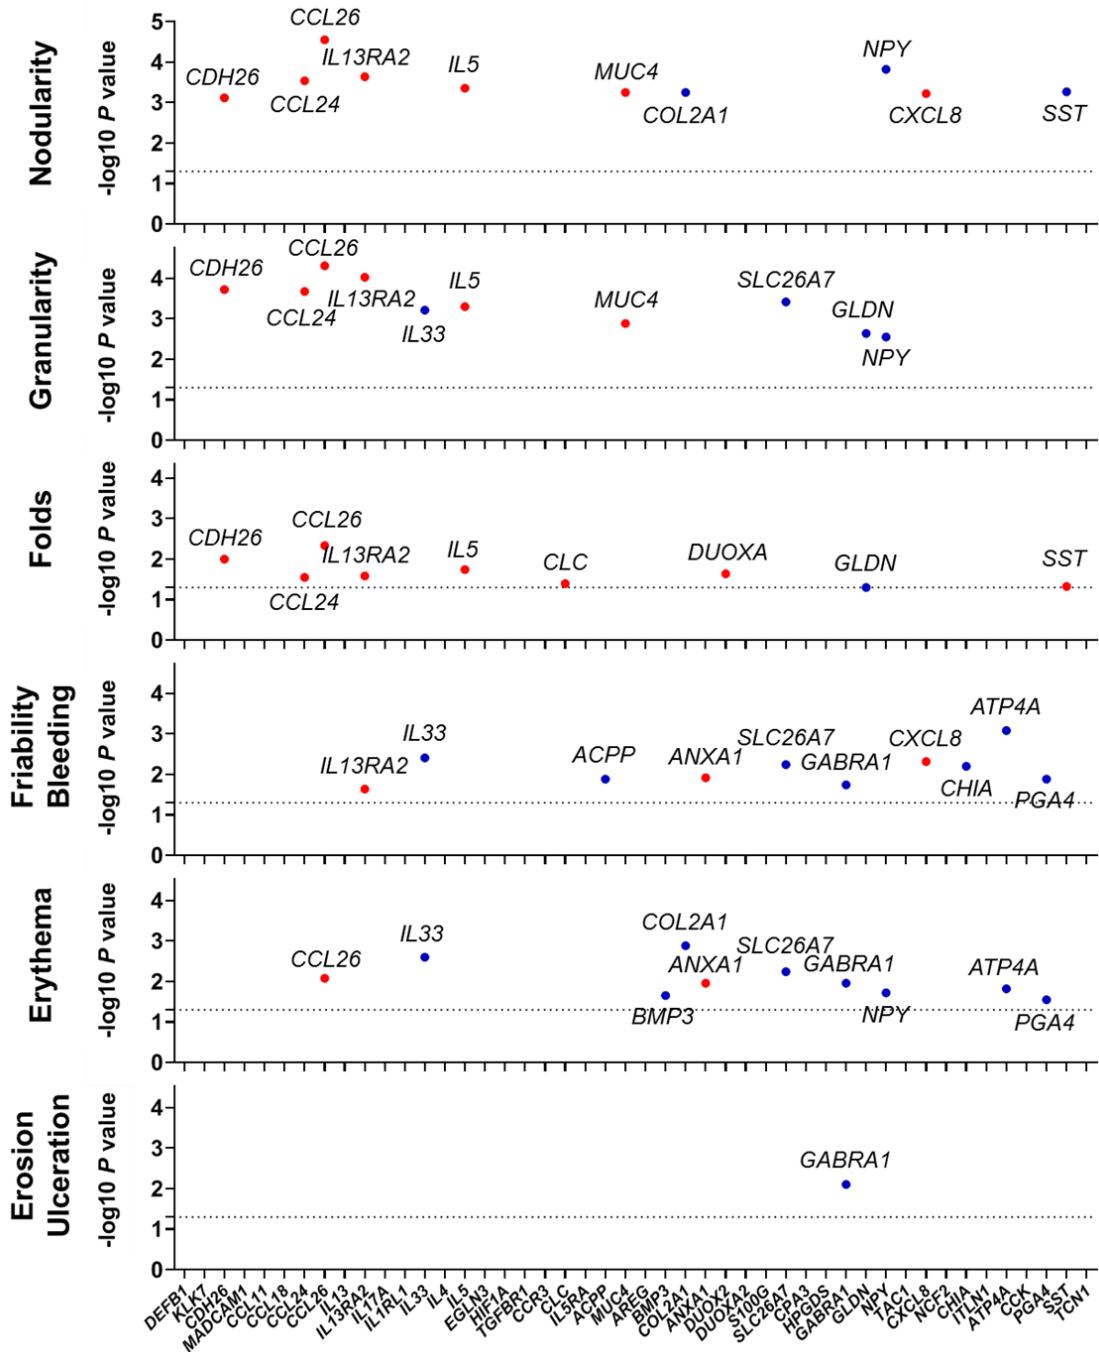

**Supplementary Figure 6.** Correlations between EG endoscopic features and a diagnostic subset of the EG transcriptome. The y axis represents the negative log<sub>10</sub> *P* value of the Spearman correlation between 6 eosinophilic gastritis (EG) endoscopic features and a diagnostic subset of genes from the EG transcriptome (eosinophilic gastritis diagnostic panel [EGDP]). The x axis represents the top 10 genes for each feature ( $P < .05$ ). A red dot indicates a positive correlation, and a blue dot indicates a negative correlation. The dashed line indicates  $P < .05$ .

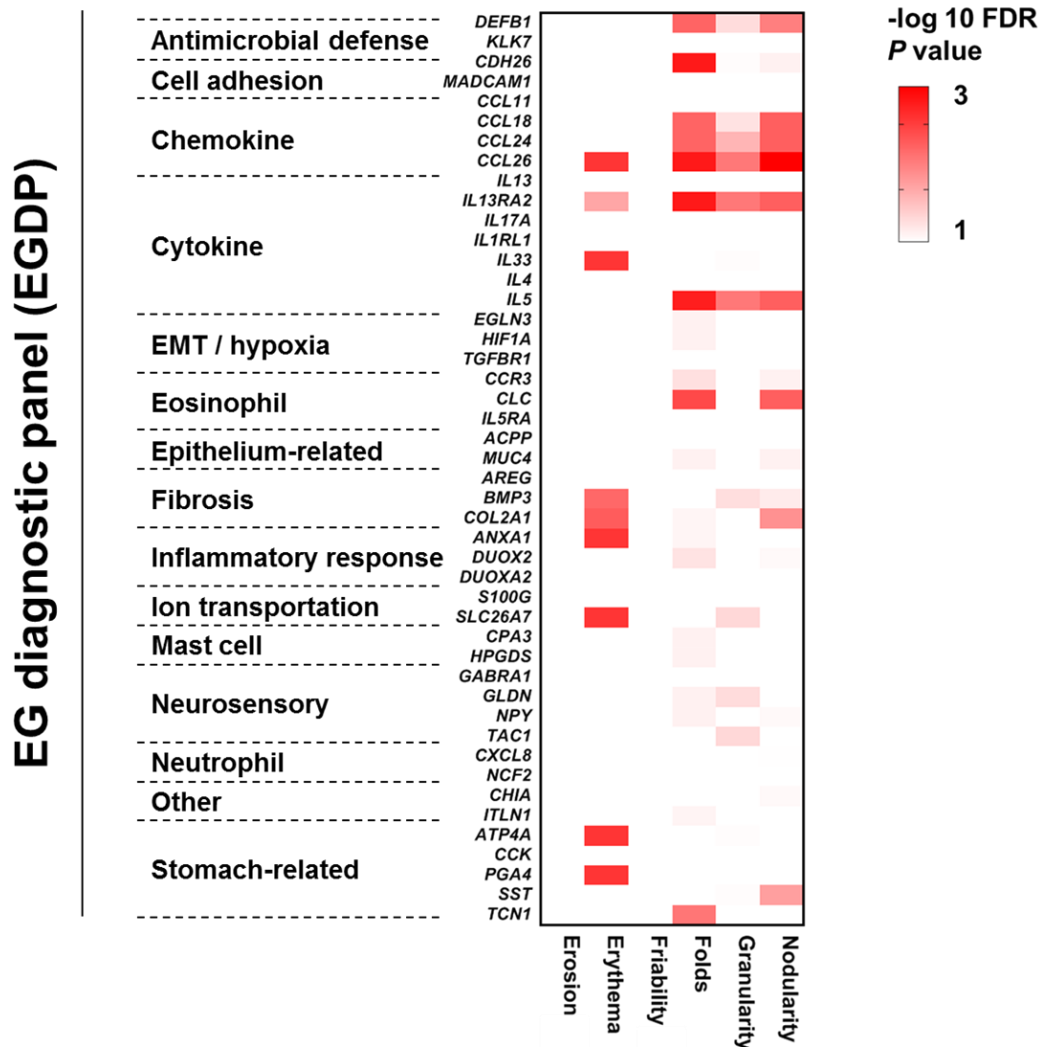

**Supplementary Figure 7.** Heat map showing  $-\log_{10}$  FDR  $P$  value determined by differential expression between patients with EG with or without a specific endoscopic feature by the Mann-Whitney  $U$  test. A tile is displayed if the FDR  $P$  value  $< .05$  for each gene in the 46-gene panel (y axis), as distributed among endoscopic features (x axis). The darker the color is, the stronger the differential gene expression. *EG*, eosinophilic gastritis; *EGDP*, eosinophilic gastritis diagnostic panel; *EMT*, epithelial-to-mesenchymal transition; *FDR*, false-discovery rate.

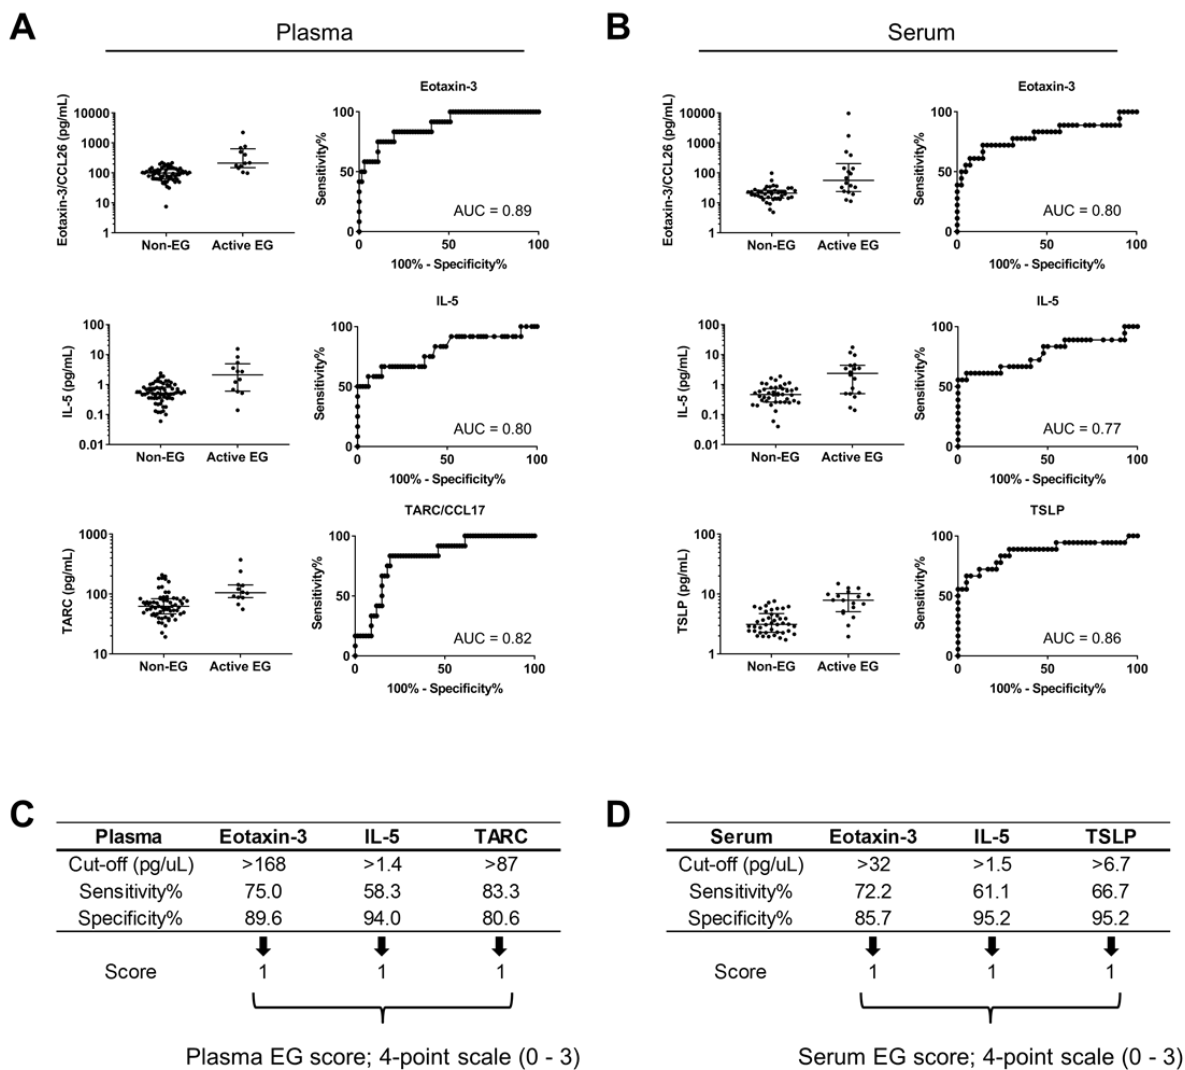

**Supplementary Figure 8.** Development of blood EG score based on significantly increased biomarkers. **A** and **B**, Levels of 3 biomarkers between the non-EG patients and patients with EG in the (A) plasma and (B) serum cohort (*left panels*). Line and error bars show the median and interquartile range, respectively. Data points represent individual subjects. ROC curves and performances of each biomarkers in the (A) plasma and (B) serum cohort (*right panels*). **C** and **D**, Scoring systems for plasma (C) and serum (D) established by dysregulated biomarker levels. *AUC*, area under the curve; *EG*, eosinophilic gastritis; *ROC*, receiver operating characteristic.



**List of EG transcriptome genes identified by RNA sequencing**

| <b>Name</b>       | <b>Ensembl annotation</b> | <b>Fold change</b> | <b>FDR p-value</b> |
|-------------------|---------------------------|--------------------|--------------------|
| <i>CCL26</i>      | ENSG00000006606           | 3590.94            | 1.00E-15           |
| <i>ITLN1</i>      | ENSG00000179914           | 243.47             | 1.00E-15           |
| <i>SNORD3D_1</i>  | ENSG00000277947           | 233.86             | 1.24E-05           |
| <i>SH2D1B</i>     | ENSG00000198574           | 146.87             | 1.00E-15           |
| <i>LINC02577</i>  | ENSG00000228742           | 133.06             | 2.94E-09           |
| <i>HSD3B2</i>     | ENSG00000203859           | 116.93             | 1.00E-15           |
| <i>C8B</i>        | ENSG00000021852           | 110.09             | 3.47E-05           |
| <i>TREML2</i>     | ENSG00000112195           | 100.99             | 1.00E-15           |
| <i>TNFRSF6B</i>   | ENSG00000243509           | 77.00              | 4.65E-04           |
| <i>KLK7</i>       | ENSG00000169035           | 68.34              | 4.86E-07           |
| <i>CDH26</i>      | ENSG00000124215           | 62.79              | 1.00E-15           |
| <i>TBC1D3E</i>    | ENSG00000278599           | 56.19              | 3.47E-03           |
| <i>ADAMTS20</i>   | ENSG00000173157           | 51.27              | 1.52E-06           |
| <i>SERPINB2</i>   | ENSG00000197632           | 50.92              | 1.00E-15           |
| <i>ALOX15</i>     | ENSG00000161905           | 48.33              | 1.00E-15           |
| <i>AC092892.1</i> | ENSG00000242770           | 47.63              | 1.31E-07           |
| <i>WDR72</i>      | ENSG00000166415           | 47.08              | 1.00E-15           |
| <i>AL157815.1</i> | ENSG00000282865           | 44.51              | 1.29E-04           |
| <i>AC015563.2</i> | ENSG00000264982           | 43.97              | 4.44E-03           |
| <i>AC079062.1</i> | ENSG00000263711           | 43.39              | 9.97E-05           |
| <i>PRB1</i>       | ENSG00000251655           | 43.30              | 8.12E-08           |
| <i>AL159152.1</i> | ENSG00000283097           | 43.00              | 4.19E-03           |
| <i>PSG3</i>       | ENSG00000221826           | 42.16              | 2.30E-03           |
| <i>IL13</i>       | ENSG00000169194           | 41.46              | 3.19E-07           |
| <i>AL132780.3</i> | ENSG00000259132           | 40.61              | 1.00E-02           |
| <i>GPC5</i>       | ENSG00000179399           | 39.06              | 1.00E-15           |
| <i>MS4A3</i>      | ENSG00000149516           | 38.61              | 6.18E-05           |
| <i>CLC</i>        | ENSG00000105205           | 37.91              | 1.00E-15           |
| <i>C4BPA</i>      | ENSG00000123838           | 37.61              | 2.73E-07           |
| <i>GNAT3</i>      | ENSG00000214415           | 35.76              | 2.19E-09           |
| <i>CEBPE</i>      | ENSG00000092067           | 35.24              | 9.18E-11           |
| <i>DUOXA2</i>     | ENSG00000140274           | 31.88              | 1.00E-15           |
| <i>BPIFB1</i>     | ENSG00000125999           | 31.86              | 1.00E-15           |
| <i>PADI4</i>      | ENSG00000159339           | 31.43              | 8.89E-07           |
| <i>AL356118.1</i> | ENSG00000282864           | 31.30              | 1.31E-10           |
| <i>VSTM1</i>      | ENSG00000189068           | 30.99              | 1.54E-07           |
| <i>CCL13</i>      | ENSG00000181374           | 30.89              | 1.00E-15           |
| <i>PRB2</i>       | ENSG00000121335           | 30.81              | 2.85E-09           |
| <i>LINC02300</i>  | ENSG00000258175           | 29.94              | 1.00E-02           |
| <i>PGA4</i>       | ENSG00000229183           | 29.62              | 1.56E-04           |
| <i>SAA1</i>       | ENSG00000173432           | 28.33              | 1.37E-06           |
| <i>HIST1H4K</i>   | ENSG00000273542           | 28.17              | 5.20E-04           |

|                   |                 |       |          |
|-------------------|-----------------|-------|----------|
| <i>GSDMC</i>      | ENSG00000147697 | 27.53 | 4.18E-10 |
| <i>ADGRG3</i>     | ENSG00000182885 | 26.82 | 1.00E-15 |
| <i>AC020895.2</i> | ENSG00000280091 | 26.44 | 4.85E-06 |
| <i>SNORA50A_2</i> | ENSG00000281910 | 25.07 | 5.00E-02 |
| <i>TCN1</i>       | ENSG00000134827 | 24.59 | 1.00E-15 |
| <i>SLC4A1</i>     | ENSG00000004939 | 24.53 | 2.40E-04 |
| <i>OLFM4</i>      | ENSG00000102837 | 23.94 | 1.35E-05 |
| <i>REG1B</i>      | ENSG00000172023 | 23.83 | 2.81E-03 |
| <i>ADGRG7</i>     | ENSG00000144820 | 23.83 | 2.25E-05 |
| <i>CCDC190</i>    | ENSG00000185860 | 23.79 | 1.21E-06 |
| <i>MUC4</i>       | ENSG00000145113 | 23.44 | 1.00E-15 |
| <i>CCL18</i>      | ENSG00000275385 | 23.04 | 1.00E-15 |
| <i>LINC02431</i>  | ENSG00000248872 | 22.31 | 3.31E-04 |
| <i>ADGRE3</i>     | ENSG00000131355 | 21.02 | 1.00E-15 |
| <i>CCR3</i>       | ENSG00000183625 | 20.03 | 2.17E-12 |
| <i>LINP1</i>      | ENSG00000223784 | 19.96 | 1.00E-02 |
| <i>LGALS12</i>    | ENSG00000133317 | 19.88 | 4.24E-08 |
| <i>LINC02418</i>  | ENSG00000214039 | 19.59 | 4.26E-05 |
| <i>HBD</i>        | ENSG00000223609 | 19.46 | 3.35E-05 |
| <i>IL13RA2</i>    | ENSG00000123496 | 19.26 | 1.00E-15 |
| <i>AC126564.1</i> | ENSG00000280217 | 19.17 | 4.00E-02 |
| <i>OLIG2</i>      | ENSG00000205927 | 18.45 | 3.40E-05 |
| <i>AC016866.3</i> | ENSG00000280335 | 18.29 | 2.52E-09 |
| <i>CCL23</i>      | ENSG00000274736 | 17.62 | 5.84E-05 |
| <i>ADGRE1</i>     | ENSG00000174837 | 17.44 | 1.00E-15 |
| <i>CASC19</i>     | ENSG00000254166 | 17.40 | 1.00E-15 |
| <i>SERPINA3</i>   | ENSG00000196136 | 17.35 | 2.95E-10 |
| <i>HMX3</i>       | ENSG00000188620 | 17.32 | 4.00E-02 |
| <i>AP001150.1</i> | ENSG00000259541 | 17.31 | 7.01E-07 |
| <i>AC016168.3</i> | ENSG00000280122 | 17.24 | 8.48E-04 |
| <i>SLC28A3</i>    | ENSG00000197506 | 16.97 | 1.00E-15 |
| <i>TAT</i>        | ENSG00000198650 | 16.96 | 9.83E-09 |
| <i>CCDC129</i>    | ENSG00000180347 | 16.95 | 1.00E-15 |
| <i>AC025278.1</i> | ENSG00000268845 | 16.55 | 5.00E-02 |
| <i>OLIG1</i>      | ENSG00000184221 | 16.42 | 1.51E-04 |
| <i>CHI3L1</i>     | ENSG00000133048 | 16.19 | 3.31E-09 |
| <i>CCL24</i>      | ENSG00000106178 | 15.88 | 1.00E-15 |
| <i>AC097478.1</i> | ENSG00000251095 | 15.83 | 3.60E-05 |
| <i>DUOX2</i>      | ENSG00000140279 | 15.71 | 1.00E-15 |
| <i>HRH4</i>       | ENSG00000134489 | 15.56 | 5.08E-10 |
| <i>PTPRO</i>      | ENSG00000151490 | 15.38 | 1.00E-15 |
| <i>AB015752.1</i> | ENSG00000254180 | 15.17 | 3.00E-02 |
| <i>PI3</i>        | ENSG00000124102 | 14.82 | 1.38E-12 |
| <i>SAA2</i>       | ENSG00000134339 | 14.52 | 6.22E-05 |

|                   |                 |       |          |
|-------------------|-----------------|-------|----------|
| <i>HBE1</i>       | ENSG00000213931 | 14.27 | 2.00E-02 |
| <i>HTR3C</i>      | ENSG00000178084 | 14.26 | 2.03E-05 |
| <i>GF11B</i>      | ENSG00000165702 | 14.26 | 1.26E-08 |
| <i>SERPINB4</i>   | ENSG00000206073 | 13.69 | 3.98E-04 |
| <i>SH2D7</i>      | ENSG00000183476 | 13.68 | 1.00E-15 |
| <i>LINC01630</i>  | ENSG00000227115 | 13.27 | 4.49E-03 |
| <i>PSG7</i>       | ENSG00000221878 | 13.24 | 3.98E-03 |
| <i>AL162456.1</i> | ENSG00000282997 | 13.01 | 4.88E-03 |
| <i>TREML4</i>     | ENSG00000188056 | 12.91 | 2.00E-02 |
| <i>CCDC60</i>     | ENSG00000183273 | 12.75 | 1.82E-05 |
| <i>LINC02042</i>  | ENSG00000240893 | 12.53 | 1.74E-03 |
| <i>BMX</i>        | ENSG00000102010 | 12.36 | 1.00E-15 |
| <i>PIWIL1</i>     | ENSG00000125207 | 12.29 | 5.44E-06 |
| <i>AP000904.1</i> | ENSG00000273415 | 12.20 | 2.00E-02 |
| <i>HKDC1</i>      | ENSG00000156510 | 12.16 | 4.46E-10 |
| <i>CDH3</i>       | ENSG00000062038 | 11.99 | 1.00E-15 |
| <i>C6orf58</i>    | ENSG00000184530 | 11.93 | 8.35E-06 |
| <i>AC139749.1</i> | ENSG00000254872 | 11.77 | 1.00E-15 |
| <i>ACTC1</i>      | ENSG00000159251 | 11.68 | 3.15E-08 |
| <i>NRK</i>        | ENSG00000123572 | 11.64 | 1.11E-04 |
| <i>AC111000.4</i> | ENSG00000250696 | 11.62 | 6.24E-07 |
| <i>PROK1</i>      | ENSG00000143125 | 11.60 | 1.36E-03 |
| <i>AP005137.2</i> | ENSG00000272703 | 11.57 | 1.66E-03 |
| <i>AC012321.1</i> | ENSG00000260772 | 11.40 | 8.33E-04 |
| <i>CELA1</i>      | ENSG00000139610 | 11.34 | 5.00E-02 |
| <i>TBC1D3C</i>    | ENSG00000278299 | 11.25 | 2.55E-03 |
| <i>SLCO1B3</i>    | ENSG00000111700 | 10.92 | 1.00E-02 |
| <i>AMY1C</i>      | ENSG00000187733 | 10.75 | 4.00E-02 |
| <i>CCK</i>        | ENSG00000187094 | 10.63 | 1.48E-09 |
| <i>HTR3E</i>      | ENSG00000186038 | 10.45 | 7.43E-11 |
| <i>AC097478.3</i> | ENSG00000276542 | 10.29 | 1.00E-02 |
| <i>LINC02073</i>  | ENSG00000267452 | 10.11 | 2.89E-03 |
| <i>WFDC21P</i>    | ENSG00000261040 | 10.06 | 1.48E-08 |
| <i>AL034397.3</i> | ENSG00000274536 | 10.00 | 7.24E-11 |
| <i>UCN2</i>       | ENSG00000145040 | 9.85  | 4.00E-02 |
| <i>PRSS33</i>     | ENSG00000103355 | 9.84  | 6.60E-05 |
| <i>ABCA12</i>     | ENSG00000144452 | 9.81  | 4.82E-05 |
| <i>KRT2</i>       | ENSG00000172867 | 9.75  | 2.00E-02 |
| <i>HK3</i>        | ENSG00000160883 | 9.56  | 6.65E-13 |
| <i>CLEC4G</i>     | ENSG00000182566 | 9.49  | 4.73E-06 |
| <i>ALKALI</i>     | ENSG00000196711 | 9.36  | 1.74E-03 |
| <i>AL355916.1</i> | ENSG00000250548 | 9.31  | 2.16E-06 |
| <i>CHAT</i>       | ENSG00000070748 | 9.28  | 7.26E-03 |
| <i>LY6D</i>       | ENSG00000167656 | 9.26  | 1.00E-02 |

|                    |                 |      |          |
|--------------------|-----------------|------|----------|
| <i>ERBB4</i>       | ENSG00000178568 | 9.18 | 1.72E-06 |
| <i>MUC5B</i>       | ENSG00000117983 | 9.17 | 1.98E-13 |
| <i>DDX53</i>       | ENSG00000184735 | 9.16 | 4.03E-03 |
| <i>NLRP12</i>      | ENSG00000142405 | 9.14 | 5.41E-05 |
| <i>C6orf223</i>    | ENSG00000181577 | 9.08 | 3.01E-06 |
| <i>TRPM5</i>       | ENSG00000070985 | 9.08 | 2.91E-13 |
| <i>PRSS2</i>       | ENSG00000275896 | 8.87 | 6.13E-03 |
| <i>ALAS2</i>       | ENSG00000158578 | 8.77 | 2.10E-03 |
| <i>CT83</i>        | ENSG00000204019 | 8.76 | 3.00E-02 |
| <i>ZPLD1</i>       | ENSG00000170044 | 8.75 | 1.00E-04 |
| <i>SFTPA2</i>      | ENSG00000185303 | 8.67 | 1.00E-02 |
| <i>AL583785.1</i>  | ENSG00000226197 | 8.64 | 3.23E-03 |
| <i>NFE2</i>        | ENSG00000123405 | 8.58 | 4.37E-07 |
| <i>CD200R1L</i>    | ENSG00000206531 | 8.44 | 3.00E-02 |
| <i>UNC5D</i>       | ENSG00000156687 | 8.43 | 5.32E-10 |
| <i>LTF</i>         | ENSG00000012223 | 8.40 | 2.12E-07 |
| <i>CHURC1-FNTB</i> | ENSG00000125954 | 8.37 | 3.00E-02 |
| <i>TRIM15</i>      | ENSG00000204610 | 8.35 | 4.21E-11 |
| <i>AMY2A</i>       | ENSG00000243480 | 8.29 | 2.00E-02 |
| <i>GABRA4</i>      | ENSG00000109158 | 8.21 | 7.19E-08 |
| <i>PSG1</i>        | ENSG00000231924 | 8.16 | 8.32E-04 |
| <i>VNN3</i>        | ENSG00000093134 | 8.11 | 9.89E-05 |
| <i>AL158064.2</i>  | ENSG00000284196 | 8.09 | 2.00E-02 |
| <i>AL033397.1</i>  | ENSG00000231683 | 8.05 | 1.00E-02 |
| <i>OR52K1</i>      | ENSG00000196778 | 7.97 | 7.04E-03 |
| <i>PLA2G2A</i>     | ENSG00000188257 | 7.96 | 2.37E-03 |
| <i>WFDC2</i>       | ENSG00000101443 | 7.89 | 1.00E-15 |
| <i>ANXA13</i>      | ENSG00000104537 | 7.82 | 1.18E-09 |
| <i>GUCA1A</i>      | ENSG00000048545 | 7.81 | 5.76E-03 |
| <i>TRIM7</i>       | ENSG00000146054 | 7.65 | 1.48E-11 |
| <i>AC243829.4</i>  | ENSG00000277089 | 7.53 | 4.28E-05 |
| <i>C8A</i>         | ENSG00000157131 | 7.50 | 2.56E-06 |
| <i>MMP12</i>       | ENSG00000262406 | 7.48 | 3.80E-06 |
| <i>PSG5</i>        | ENSG00000204941 | 7.46 | 3.00E-02 |
| <i>PSG8</i>        | ENSG00000124467 | 7.39 | 8.81E-03 |
| <i>LINC00443</i>   | ENSG00000230156 | 7.34 | 2.67E-04 |
| <i>RNU5F-1</i>     | ENSG00000199377 | 7.32 | 1.89E-04 |
| <i>RNASE2</i>      | ENSG00000169385 | 7.31 | 1.00E-02 |
| <i>CAPN14</i>      | ENSG00000214711 | 7.29 | 2.00E-02 |
| <i>AC011511.5</i>  | ENSG00000267607 | 7.29 | 5.00E-02 |
| <i>CIQTNF1-AS1</i> | ENSG00000265096 | 7.28 | 4.00E-02 |
| <i>RNU5A-8P</i>    | ENSG00000200972 | 7.25 | 9.86E-04 |
| <i>SPSB4</i>       | ENSG00000175093 | 7.24 | 3.50E-03 |
| <i>CIQTNF1</i>     | ENSG00000173918 | 7.21 | 1.00E-15 |

|                   |                 |      |          |
|-------------------|-----------------|------|----------|
| <i>MLC1</i>       | ENSG00000100427 | 7.21 | 1.40E-07 |
| <i>IL19</i>       | ENSG00000142224 | 7.09 | 4.77E-05 |
| <i>HRK</i>        | ENSG00000135116 | 7.03 | 5.47E-03 |
| <i>PSG6</i>       | ENSG00000170848 | 6.92 | 7.74E-03 |
| <i>AC090753.1</i> | ENSG00000254000 | 6.91 | 4.83E-04 |
| <i>LIPG</i>       | ENSG00000101670 | 6.91 | 1.00E-15 |
| <i>AC009163.2</i> | ENSG00000260092 | 6.88 | 5.27E-06 |
| <i>AC079298.2</i> | ENSG00000280005 | 6.85 | 2.00E-02 |
| <i>DSCAM</i>      | ENSG00000171587 | 6.83 | 3.63E-03 |
| <i>GLB1L3</i>     | ENSG00000166105 | 6.79 | 3.59E-05 |
| <i>SHD</i>        | ENSG00000105251 | 6.79 | 1.00E-02 |
| <i>AC025524.2</i> | ENSG00000254119 | 6.73 | 2.00E-02 |
| <i>AL359095.1</i> | ENSG00000230001 | 6.69 | 2.81E-05 |
| <i>CTRB2</i>      | ENSG00000168928 | 6.69 | 4.00E-02 |
| <i>AL049839.2</i> | ENSG00000273259 | 6.63 | 2.00E-02 |
| <i>AC044839.2</i> | ENSG00000255226 | 6.51 | 2.00E-02 |
| <i>EGLN3</i>      | ENSG00000129521 | 6.51 | 1.00E-15 |
| <i>CLDN2</i>      | ENSG00000165376 | 6.49 | 5.58E-06 |
| <i>LINC02009</i>  | ENSG00000283646 | 6.43 | 2.72E-07 |
| <i>CXCL5</i>      | ENSG00000163735 | 6.42 | 1.92E-03 |
| <i>HIF1A-AS2</i>  | ENSG00000258667 | 6.36 | 6.56E-05 |
| <i>GCGR</i>       | ENSG00000215644 | 6.36 | 2.00E-02 |
| <i>SH2D6</i>      | ENSG00000152292 | 6.12 | 3.21E-11 |
| <i>RN7SKP266</i>  | ENSG00000222164 | 6.11 | 4.00E-02 |
| <i>LITD1</i>      | ENSG00000240563 | 6.09 | 1.00E-02 |
| <i>AC078789.1</i> | ENSG00000257880 | 6.06 | 1.00E-02 |
| <i>RETREG1</i>    | ENSG00000154153 | 6.05 | 1.00E-15 |
| <i>LINC01235</i>  | ENSG00000270547 | 6.05 | 2.69E-04 |
| <i>AC108463.3</i> | ENSG00000271590 | 6.04 | 2.67E-03 |
| <i>NPTX1</i>      | ENSG00000171246 | 6.00 | 7.03E-04 |
| <i>AP000873.3</i> | ENSG00000254551 | 5.99 | 2.00E-02 |
| <i>ST3GAL4</i>    | ENSG00000110080 | 5.91 | 1.00E-15 |
| <i>AC011389.3</i> | ENSG00000279752 | 5.85 | 3.00E-02 |
| <i>AL031283.3</i> | ENSG00000236045 | 5.84 | 6.30E-05 |
| <i>SELP</i>       | ENSG00000174175 | 5.80 | 1.00E-15 |
| <i>CAPN13</i>     | ENSG00000162949 | 5.80 | 1.00E-15 |
| <i>HBA1</i>       | ENSG00000206172 | 5.77 | 2.19E-03 |
| <i>HPDL</i>       | ENSG00000186603 | 5.74 | 1.00E-15 |
| <i>CD300LF</i>    | ENSG00000186074 | 5.74 | 3.41E-07 |
| <i>SEMG1</i>      | ENSG00000124233 | 5.71 | 4.00E-02 |
| <i>KCNE1</i>      | ENSG00000180509 | 5.70 | 3.93E-05 |
| <i>GP2</i>        | ENSG00000169347 | 5.69 | 1.48E-05 |
| <i>UTS2</i>       | ENSG00000049247 | 5.68 | 9.25E-03 |
| <i>LINC01665</i>  | ENSG00000235343 | 5.65 | 6.90E-03 |

|                    |                 |      |          |
|--------------------|-----------------|------|----------|
| <i>ANXA1</i>       | ENSG00000135046 | 5.62 | 1.95E-12 |
| <i>EREG</i>        | ENSG00000124882 | 5.61 | 2.71E-04 |
| <i>RGS13</i>       | ENSG00000127074 | 5.60 | 5.05E-11 |
| <i>KYAT1</i>       | ENSG00000171097 | 5.55 | 1.00E-15 |
| <i>ADAMDEC1</i>    | ENSG00000134028 | 5.53 | 2.12E-09 |
| <i>TMIGD3</i>      | ENSG00000121933 | 5.51 | 1.29E-06 |
| <i>IL11</i>        | ENSG00000095752 | 5.51 | 1.00E-02 |
| <i>SLC9B2</i>      | ENSG00000164038 | 5.49 | 1.00E-15 |
| <i>RAB44</i>       | ENSG00000255587 | 5.49 | 1.17E-06 |
| <i>MDF1</i>        | ENSG00000112559 | 5.48 | 2.59E-07 |
| <i>TNFRSF10C</i>   | ENSG00000173535 | 5.45 | 1.76E-06 |
| <i>CRISP2</i>      | ENSG00000124490 | 5.39 | 3.00E-02 |
| <i>HPR</i>         | ENSG00000261701 | 5.30 | 4.53E-03 |
| <i>NCF2</i>        | ENSG00000116701 | 5.28 | 5.43E-11 |
| <i>GAPT</i>        | ENSG00000175857 | 5.26 | 1.08E-06 |
| <i>FAM155A-IT1</i> | ENSG00000227248 | 5.23 | 2.00E-02 |
| <i>PLA2G3</i>      | ENSG00000100078 | 5.22 | 7.14E-06 |
| <i>GCNT3</i>       | ENSG00000140297 | 5.20 | 1.00E-15 |
| <i>HDAC9</i>       | ENSG00000048052 | 5.18 | 1.45E-09 |
| <i>CD300LB</i>     | ENSG00000178789 | 5.17 | 1.23E-05 |
| <i>AC068491.3</i>  | ENSG00000270190 | 5.13 | 3.00E-02 |
| <i>DAB1</i>        | ENSG00000173406 | 5.10 | 5.43E-07 |
| <i>SNCA</i>        | ENSG00000145335 | 5.10 | 4.74E-06 |
| <i>CLNK</i>        | ENSG00000109684 | 5.08 | 9.84E-09 |
| <i>RN7SL471P</i>   | ENSG00000263426 | 5.08 | 2.09E-03 |
| <i>IL1RL1</i>      | ENSG00000115602 | 5.04 | 1.88E-10 |
| <i>CHST6</i>       | ENSG00000183196 | 5.02 | 1.84E-03 |
| <i>AL162727.1</i>  | ENSG00000233817 | 5.01 | 2.00E-02 |
| <i>CHST5</i>       | ENSG00000135702 | 5.01 | 1.65E-08 |
| <i>RHOXF2B</i>     | ENSG00000203989 | 5.01 | 3.00E-02 |
| <i>HOXB7</i>       | ENSG00000260027 | 4.94 | 1.65E-03 |
| <i>AC084048.1</i>  | ENSG00000249334 | 4.93 | 2.00E-02 |
| <i>DLGAP1-AS5</i>  | ENSG00000261520 | 4.93 | 4.36E-03 |
| <i>CFI</i>         | ENSG00000205403 | 4.92 | 9.08E-09 |
| <i>CP</i>          | ENSG00000047457 | 4.91 | 4.06E-06 |
| <i>GATA1</i>       | ENSG00000102145 | 4.90 | 1.00E-02 |
| <i>RNU5E-1</i>     | ENSG00000199347 | 4.89 | 2.00E-02 |
| <i>AL355312.3</i>  | ENSG00000273132 | 4.89 | 7.43E-04 |
| <i>ALDH1A2</i>     | ENSG00000128918 | 4.89 | 1.79E-05 |
| <i>ACOXL</i>       | ENSG00000153093 | 4.88 | 1.00E-02 |
| <i>SRARP</i>       | ENSG00000183888 | 4.87 | 2.00E-02 |
| <i>SMIM33</i>      | ENSG00000283288 | 4.85 | 6.98E-05 |
| <i>IL5RA</i>       | ENSG00000091181 | 4.84 | 4.38E-07 |
| <i>INO80C</i>      | ENSG00000153391 | 4.78 | 1.00E-15 |

|                   |                 |      |          |
|-------------------|-----------------|------|----------|
| <i>ALDH3B2</i>    | ENSG00000132746 | 4.77 | 5.23E-03 |
| <i>ITGA2B</i>     | ENSG00000005961 | 4.76 | 1.13E-03 |
| <i>ADH6</i>       | ENSG00000172955 | 4.75 | 9.04E-08 |
| <i>STAB2</i>      | ENSG00000136011 | 4.74 | 1.56E-04 |
| <i>CD274</i>      | ENSG00000120217 | 4.72 | 1.17E-12 |
| <i>SLC6A14</i>    | ENSG00000268104 | 4.64 | 7.95E-07 |
| <i>TRIM10</i>     | ENSG00000204613 | 4.63 | 2.47E-05 |
| <i>TNS4</i>       | ENSG00000131746 | 4.63 | 1.37E-07 |
| <i>CXCL8</i>      | ENSG00000169429 | 4.62 | 1.00E-02 |
| <i>AL603840.1</i> | ENSG00000234810 | 4.61 | 3.51E-03 |
| <i>AC011603.2</i> | ENSG00000258017 | 4.60 | 4.06E-03 |
| <i>HCK</i>        | ENSG00000101336 | 4.58 | 3.57E-12 |
| <i>RD3</i>        | ENSG00000198570 | 4.56 | 2.00E-02 |
| <i>CLDN4</i>      | ENSG00000189143 | 4.54 | 6.41E-06 |
| <i>AREG</i>       | ENSG00000109321 | 4.53 | 4.28E-05 |
| <i>DCLK3</i>      | ENSG00000163673 | 4.52 | 5.00E-02 |
| <i>CD55</i>       | ENSG00000196352 | 4.50 | 1.00E-15 |
| <i>AC007998.5</i> | ENSG00000279074 | 4.50 | 5.80E-03 |
| <i>AC013549.2</i> | ENSG00000254688 | 4.49 | 5.00E-02 |
| <i>ST3GAL6</i>    | ENSG00000064225 | 4.47 | 1.00E-15 |
| <i>TNFSF11</i>    | ENSG00000120659 | 4.47 | 2.22E-03 |
| <i>SLC28A2</i>    | ENSG00000137860 | 4.47 | 3.30E-04 |
| <i>AL138752.2</i> | ENSG00000255872 | 4.45 | 3.00E-02 |
| <i>GLYATL2</i>    | ENSG00000156689 | 4.45 | 2.00E-02 |
| <i>LINC01013</i>  | ENSG00000228495 | 4.44 | 2.85E-03 |
| <i>INHBA</i>      | ENSG00000122641 | 4.43 | 9.45E-05 |
| <i>FAM95C</i>     | ENSG00000283486 | 4.42 | 2.92E-10 |
| <i>GPR87</i>      | ENSG00000138271 | 4.41 | 2.00E-02 |
| <i>MMP1</i>       | ENSG00000196611 | 4.40 | 5.43E-11 |
| <i>RN7SL449P</i>  | ENSG00000242889 | 4.38 | 2.00E-02 |
| <i>NOXO1</i>      | ENSG00000196408 | 4.37 | 1.00E-02 |
| <i>NABP1</i>      | ENSG00000173559 | 4.34 | 1.32E-12 |
| <i>AC004990.1</i> | ENSG00000232756 | 4.34 | 1.00E-02 |
| <i>PKHD1L1</i>    | ENSG00000205038 | 4.34 | 2.44E-07 |
| <i>AC007906.2</i> | ENSG00000277639 | 4.31 | 1.15E-05 |
| <i>FGFBP1</i>     | ENSG00000137440 | 4.26 | 2.62E-03 |
| <i>CDA</i>        | ENSG00000158825 | 4.25 | 2.00E-02 |
| <i>FAM3D</i>      | ENSG00000198643 | 4.22 | 4.10E-11 |
| <i>UPP1</i>       | ENSG00000183696 | 4.22 | 1.75E-10 |
| <i>AP001453.2</i> | ENSG00000256940 | 4.22 | 4.47E-04 |
| <i>CALHM1</i>     | ENSG00000185933 | 4.21 | 2.00E-02 |
| <i>LCN2</i>       | ENSG00000148346 | 4.19 | 4.33E-06 |
| <i>AL390726.3</i> | ENSG00000272904 | 4.18 | 1.42E-04 |
| <i>RNU5E-6P</i>   | ENSG00000202444 | 4.16 | 2.00E-02 |

|                   |                 |      |          |
|-------------------|-----------------|------|----------|
| <i>ADGRF4</i>     | ENSG00000153294 | 4.15 | 2.00E-02 |
| <i>AP005131.2</i> | ENSG00000267366 | 4.11 | 1.88E-03 |
| <i>LINC00839</i>  | ENSG00000185904 | 4.10 | 4.00E-02 |
| <i>SIGLEC10</i>   | ENSG00000142512 | 4.10 | 1.65E-05 |
| <i>AVIL</i>       | ENSG00000135407 | 4.07 | 2.50E-12 |
| <i>CXCR2</i>      | ENSG00000180871 | 4.06 | 1.60E-03 |
| <i>FCGBP</i>      | ENSG00000275395 | 4.03 | 1.42E-08 |
| <i>UGT2B11</i>    | ENSG00000213759 | 3.99 | 2.00E-02 |
| <i>CLDN7</i>      | ENSG00000181885 | 3.97 | 1.79E-05 |
| <i>AC007998.3</i> | ENSG00000267583 | 3.97 | 1.00E-02 |
| <i>AC017002.3</i> | ENSG00000240350 | 3.96 | 4.00E-03 |
| <i>CEACAM6</i>    | ENSG00000086548 | 3.96 | 5.64E-05 |
| <i>LRRC4</i>      | ENSG00000128594 | 3.94 | 4.35E-08 |
| <i>AC008149.1</i> | ENSG00000258177 | 3.93 | 4.00E-02 |
| <i>HPGDS</i>      | ENSG00000163106 | 3.92 | 1.03E-09 |
| <i>AC026740.1</i> | ENSG00000271781 | 3.92 | 3.41E-03 |
| <i>OR2AG2</i>     | ENSG00000188124 | 3.92 | 2.00E-02 |
| <i>AP005131.7</i> | ENSG00000272746 | 3.91 | 2.43E-04 |
| <i>HIST1H1A</i>   | ENSG00000124610 | 3.90 | 8.61E-06 |
| <i>NOTUM</i>      | ENSG00000185269 | 3.90 | 2.00E-02 |
| <i>SIRPB1</i>     | ENSG00000101307 | 3.88 | 7.92E-03 |
| <i>LINC00342</i>  | ENSG00000232931 | 3.87 | 3.71E-05 |
| <i>HRASLS</i>     | ENSG00000127252 | 3.87 | 2.00E-02 |
| <i>MFSD2A</i>     | ENSG00000168389 | 3.85 | 2.72E-05 |
| <i>PTCHD1</i>     | ENSG00000165186 | 3.79 | 5.12E-03 |
| <i>AC004009.3</i> | ENSG00000279655 | 3.77 | 2.00E-02 |
| <i>STAC</i>       | ENSG00000144681 | 3.76 | 1.00E-02 |
| <i>TPO</i>        | ENSG00000115705 | 3.73 | 4.60E-04 |
| <i>FAP</i>        | ENSG00000078098 | 3.73 | 6.08E-04 |
| <i>SERPINA1</i>   | ENSG00000197249 | 3.69 | 9.76E-06 |
| <i>PIK3R6</i>     | ENSG00000276231 | 3.67 | 5.30E-05 |
| <i>CD101</i>      | ENSG00000134256 | 3.64 | 4.23E-05 |
| <i>GPAT3</i>      | ENSG00000138678 | 3.63 | 5.43E-11 |
| <i>AC005725.1</i> | ENSG00000264727 | 3.63 | 3.60E-05 |
| <i>AP000547.3</i> | ENSG00000283633 | 3.63 | 1.90E-04 |
| <i>CD1A</i>       | ENSG00000158477 | 3.62 | 2.03E-03 |
| <i>FMO3</i>       | ENSG00000007933 | 3.62 | 3.62E-04 |
| <i>ZNF385D</i>    | ENSG00000151789 | 3.62 | 5.04E-05 |
| <i>SOCS3</i>      | ENSG00000184557 | 3.62 | 1.49E-07 |
| <i>SIGLEC8</i>    | ENSG00000105366 | 3.62 | 2.80E-04 |
| <i>FOSB</i>       | ENSG00000125740 | 3.61 | 3.00E-02 |
| <i>ADGRE2</i>     | ENSG00000127507 | 3.60 | 1.64E-06 |
| <i>WISP1</i>      | ENSG00000104415 | 3.59 | 4.70E-04 |
| <i>MELTF</i>      | ENSG00000163975 | 3.57 | 6.15E-07 |



|                    |                 |      |          |
|--------------------|-----------------|------|----------|
| <i>PSTPIP2</i>     | ENSG00000152229 | 3.57 | 3.79E-07 |
| <i>ANKRD18A</i>    | ENSG00000180071 | 3.56 | 2.03E-09 |
| <i>F3</i>          | ENSG00000117525 | 3.54 | 9.18E-11 |
| <i>AC051619.5</i>  | ENSG00000259520 | 3.52 | 5.09E-03 |
| <i>APOL1</i>       | ENSG00000100342 | 3.52 | 1.18E-09 |
| <i>RN7SL3</i>      | ENSG00000278771 | 3.50 | 5.70E-12 |
| <i>AC007319.1</i>  | ENSG00000224063 | 3.49 | 1.33E-03 |
| <i>ENKUR</i>       | ENSG00000151023 | 3.49 | 4.39E-04 |
| <i>PYGL</i>        | ENSG00000100504 | 3.47 | 1.25E-06 |
| <i>SOCS1</i>       | ENSG00000185338 | 3.47 | 1.14E-03 |
| <i>AL031283.2</i>  | ENSG00000233485 | 3.45 | 1.00E-02 |
| <i>PCSK9</i>       | ENSG00000169174 | 3.45 | 1.00E-02 |
| <i>LIF</i>         | ENSG00000128342 | 3.45 | 1.97E-06 |
| <i>SLC5A1</i>      | ENSG00000100170 | 3.44 | 2.56E-06 |
| <i>AC021483.1</i>  | ENSG00000259548 | 3.43 | 3.42E-03 |
| <i>MIR3142HG</i>   | ENSG00000253522 | 3.42 | 6.69E-03 |
| <i>CRYBG2</i>      | ENSG00000176092 | 3.41 | 1.69E-04 |
| <i>PHEX</i>        | ENSG00000102174 | 3.41 | 8.88E-03 |
| <i>SMIM25</i>      | ENSG00000224397 | 3.40 | 3.00E-02 |
| <i>NTRK1</i>       | ENSG00000198400 | 3.39 | 1.31E-03 |
| <i>NWD2</i>        | ENSG00000174145 | 3.38 | 1.00E-02 |
| <i>AL512306.2</i>  | ENSG00000240219 | 3.36 | 6.57E-03 |
| <i>AC099329.1</i>  | ENSG00000235288 | 3.36 | 2.00E-02 |
| <i>SPP1</i>        | ENSG00000118785 | 3.36 | 7.42E-03 |
| <i>RAPSN</i>       | ENSG00000165917 | 3.36 | 4.00E-02 |
| <i>ADAMTS18</i>    | ENSG00000140873 | 3.36 | 2.00E-02 |
| <i>CYSLTR2</i>     | ENSG00000152207 | 3.35 | 3.03E-03 |
| <i>AP000688.2</i>  | ENSG00000233393 | 3.35 | 1.00E-02 |
| <i>PLEKHS1</i>     | ENSG00000148735 | 3.34 | 5.04E-04 |
| <i>CATSPERB</i>    | ENSG00000133962 | 3.34 | 2.18E-07 |
| <i>HIF1A</i>       | ENSG00000100644 | 3.33 | 9.14E-13 |
| <i>ST3GAL6-AS1</i> | ENSG00000239445 | 3.32 | 1.00E-02 |
| <i>MUC17</i>       | ENSG00000169876 | 3.32 | 9.78E-03 |
| <i>FPR1</i>        | ENSG00000171051 | 3.32 | 1.00E-02 |
| <i>FCAMR</i>       | ENSG00000162897 | 3.31 | 2.00E-02 |
| <i>TRABD2A</i>     | ENSG00000186854 | 3.29 | 8.68E-04 |
| <i>AC021683.2</i>  | ENSG00000267506 | 3.29 | 2.00E-02 |
| <i>AP005131.1</i>  | ENSG00000267136 | 3.28 | 1.46E-04 |
| <i>AL133373.2</i>  | ENSG00000279286 | 3.26 | 1.00E-02 |
| <i>TIMP1</i>       | ENSG00000102265 | 3.25 | 9.18E-11 |
| <i>ANKRD36C</i>    | ENSG00000174501 | 3.24 | 9.38E-05 |
| <i>SMIM31</i>      | ENSG00000248771 | 3.24 | 9.51E-03 |
| <i>TCTEX1D1</i>    | ENSG00000152760 | 3.23 | 1.00E-02 |
| <i>AC068491.4</i>  | ENSG00000279191 | 3.21 | 1.39E-03 |

|                    |                 |      |          |
|--------------------|-----------------|------|----------|
| <i>PCDH7</i>       | ENSG00000169851 | 3.21 | 1.54E-05 |
| <i>PIGR</i>        | ENSG00000162896 | 3.19 | 2.27E-08 |
| <i>PDZK1IP1</i>    | ENSG00000162366 | 3.18 | 1.19E-10 |
| <i>AP005131.4</i>  | ENSG00000267529 | 3.18 | 4.51E-03 |
| <i>CR1</i>         | ENSG00000203710 | 3.17 | 1.00E-02 |
| <i>GLIS3</i>       | ENSG00000107249 | 3.16 | 3.56E-10 |
| <i>GAREM2</i>      | ENSG00000157833 | 3.15 | 6.72E-05 |
| <i>AC083949.1</i>  | ENSG00000224875 | 3.15 | 4.63E-03 |
| <i>CDX1</i>        | ENSG00000113722 | 3.15 | 4.00E-02 |
| <i>LAMC2</i>       | ENSG00000058085 | 3.14 | 2.70E-10 |
| <i>GABRR2</i>      | ENSG00000111886 | 3.14 | 1.00E-02 |
| <i>OIT3</i>        | ENSG00000138315 | 3.14 | 1.07E-03 |
| <i>AC007614.6</i>  | ENSG00000280189 | 3.14 | 5.00E-02 |
| <i>ANGPTL4</i>     | ENSG00000167772 | 3.14 | 6.97E-04 |
| <i>FFAR2</i>       | ENSG00000126262 | 3.14 | 2.55E-03 |
| <i>KRT80</i>       | ENSG00000167767 | 3.13 | 4.00E-02 |
| <i>SPIB</i>        | ENSG00000269404 | 3.13 | 2.00E-02 |
| <i>TFAP2C</i>      | ENSG00000087510 | 3.13 | 2.54E-03 |
| <i>CACNB4</i>      | ENSG00000182389 | 3.12 | 1.24E-03 |
| <i>TFPI</i>        | ENSG00000003436 | 3.12 | 5.06E-10 |
| <i>SI00A10</i>     | ENSG00000197747 | 3.10 | 9.89E-08 |
| <i>AC003991.1</i>  | ENSG00000228113 | 3.10 | 2.00E-02 |
| <i>FUT6</i>        | ENSG00000156413 | 3.10 | 3.18E-03 |
| <i>LINC00639</i>   | ENSG00000259070 | 3.07 | 2.00E-02 |
| <i>AL512662.2</i>  | ENSG00000283913 | 3.06 | 2.00E-02 |
| <i>LDLRAD4-AS1</i> | ENSG00000267690 | 3.06 | 4.00E-02 |
| <i>ACPP</i>        | ENSG00000014257 | 3.05 | 4.64E-07 |
| <i>PTAFR</i>       | ENSG00000169403 | 3.01 | 1.54E-08 |
| <i>MALL</i>        | ENSG00000144063 | 3.01 | 6.06E-05 |
| <i>FAM124B</i>     | ENSG00000124019 | 3.01 | 4.42E-03 |
| <i>CXCL1</i>       | ENSG00000163739 | 3.01 | 7.95E-03 |
| <i>AMOT</i>        | ENSG00000126016 | 3.01 | 3.94E-09 |
| <i>F12</i>         | ENSG00000131187 | 3.00 | 2.00E-02 |
| <i>CLRN3</i>       | ENSG00000180745 | 3.00 | 8.75E-04 |
| <i>OSCAR</i>       | ENSG00000170909 | 2.99 | 5.00E-02 |
| <i>AOC1</i>        | ENSG00000002726 | 2.96 | 1.25E-05 |
| <i>COL17A1</i>     | ENSG00000065618 | 2.96 | 1.23E-05 |
| <i>CPXM2</i>       | ENSG00000121898 | 2.96 | 4.78E-04 |
| <i>MADCAM1</i>     | ENSG00000099866 | 2.96 | 1.00E-02 |
| <i>COCH</i>        | ENSG00000100473 | 2.95 | 6.15E-04 |
| <i>GRHL3</i>       | ENSG00000158055 | 2.93 | 1.31E-03 |
| <i>HS3ST1</i>      | ENSG00000002587 | 2.92 | 2.92E-09 |
| <i>PIK3CG</i>      | ENSG00000105851 | 2.92 | 1.29E-06 |
| <i>AADAC</i>       | ENSG00000114771 | 2.90 | 4.30E-08 |

|                   |                 |      |          |
|-------------------|-----------------|------|----------|
| <i>GRM8</i>       | ENSG00000179603 | 2.90 | 2.00E-02 |
| <i>AK8</i>        | ENSG00000165695 | 2.89 | 6.29E-04 |
| <i>AC108134.3</i> | ENSG00000262370 | 2.89 | 1.00E-02 |
| <i>SIPAIL2</i>    | ENSG00000116991 | 2.88 | 8.00E-10 |
| <i>KRT15</i>      | ENSG00000171346 | 2.88 | 2.07E-03 |
| <i>ADAM23</i>     | ENSG00000114948 | 2.86 | 3.36E-04 |
| <i>COL23A1</i>    | ENSG00000050767 | 2.86 | 8.57E-04 |
| <i>CD9</i>        | ENSG00000010278 | 2.86 | 5.06E-10 |
| <i>DUOXA1</i>     | ENSG00000140254 | 2.86 | 2.20E-03 |
| <i>SLC6A8</i>     | ENSG00000130821 | 2.85 | 1.89E-04 |
| <i>DPEP2</i>      | ENSG00000167261 | 2.83 | 2.07E-03 |
| <i>AP003355.2</i> | ENSG00000272321 | 2.81 | 4.00E-02 |
| <i>ZG16B</i>      | ENSG00000162078 | 2.81 | 2.81E-05 |
| <i>PLCG2</i>      | ENSG00000197943 | 2.81 | 8.89E-09 |
| <i>SNTG2</i>      | ENSG00000172554 | 2.80 | 2.00E-02 |
| <i>LST1</i>       | ENSG00000204482 | 2.80 | 4.80E-03 |
| <i>CPZ</i>        | ENSG00000109625 | 2.79 | 3.00E-02 |
| <i>AC015871.4</i> | ENSG00000279394 | 2.79 | 7.72E-04 |
| <i>LRP8</i>       | ENSG00000157193 | 2.78 | 1.36E-03 |
| <i>AC017002.1</i> | ENSG00000224959 | 2.78 | 2.00E-02 |
| <i>TNC</i>        | ENSG00000041982 | 2.78 | 3.48E-07 |
| <i>TFF3</i>       | ENSG00000160180 | 2.78 | 4.00E-02 |
| <i>TREM2</i>      | ENSG00000095970 | 2.77 | 1.00E-02 |
| <i>MMP13</i>      | ENSG00000137745 | 2.77 | 3.00E-02 |
| <i>HCN4</i>       | ENSG00000138622 | 2.76 | 3.60E-03 |
| <i>ALOX5AP</i>    | ENSG00000132965 | 2.75 | 4.93E-04 |
| <i>KRT7</i>       | ENSG00000135480 | 2.73 | 9.65E-04 |
| <i>CISH</i>       | ENSG00000114737 | 2.72 | 1.54E-05 |
| <i>C18orf15</i>   | ENSG00000279020 | 2.72 | 3.00E-02 |
| <i>SIRPB2</i>     | ENSG00000196209 | 2.71 | 1.00E-02 |
| <i>ADH1C</i>      | ENSG00000248144 | 2.70 | 9.15E-04 |
| <i>CILP</i>       | ENSG00000138615 | 2.70 | 8.69E-03 |
| <i>AP001043.1</i> | ENSG00000205622 | 2.70 | 3.00E-02 |
| <i>TRPV4</i>      | ENSG00000111199 | 2.69 | 6.97E-03 |
| <i>SHISA6</i>     | ENSG00000188803 | 2.69 | 1.27E-05 |
| <i>RHOA-IT1</i>   | ENSG00000235908 | 2.68 | 3.00E-02 |
| <i>AC106791.1</i> | ENSG00000250159 | 2.68 | 2.70E-03 |
| <i>AL359532.1</i> | ENSG00000272914 | 2.68 | 5.00E-02 |
| <i>CALML4</i>     | ENSG00000129007 | 2.68 | 5.27E-06 |
| <i>LBH</i>        | ENSG00000213626 | 2.67 | 1.49E-07 |
| <i>ELF5</i>       | ENSG00000135374 | 2.67 | 3.00E-02 |
| <i>RHOD</i>       | ENSG00000173156 | 2.67 | 7.62E-06 |
| <i>C11orf53</i>   | ENSG00000150750 | 2.67 | 5.24E-04 |
| <i>SLC4A11</i>    | ENSG00000088836 | 2.67 | 4.81E-03 |

|                    |                 |      |          |
|--------------------|-----------------|------|----------|
| <i>FCGR3A</i>      | ENSG00000203747 | 2.66 | 3.00E-02 |
| <i>CEP72</i>       | ENSG00000112877 | 2.66 | 3.20E-03 |
| <i>C3</i>          | ENSG00000125730 | 2.66 | 3.00E-02 |
| <i>TNFRSF12A</i>   | ENSG00000006327 | 2.65 | 5.41E-03 |
| <i>AP005131.6</i>  | ENSG00000267702 | 2.65 | 3.35E-03 |
| <i>CPA3</i>        | ENSG00000163751 | 2.64 | 4.45E-06 |
| <i>ANKRD18B</i>    | ENSG00000230453 | 2.64 | 3.00E-02 |
| <i>FAM19A2</i>     | ENSG00000198673 | 2.63 | 1.18E-03 |
| <i>LINC01504</i>   | ENSG00000225434 | 2.62 | 1.00E-02 |
| <i>MMP3</i>        | ENSG00000149968 | 2.62 | 2.00E-02 |
| <i>CARD14</i>      | ENSG00000141527 | 2.61 | 2.39E-03 |
| <i>ASRGL1</i>      | ENSG00000162174 | 2.60 | 4.01E-07 |
| <i>MIR4435-2HG</i> | ENSG00000172965 | 2.59 | 4.66E-05 |
| <i>COL6A3</i>      | ENSG00000163359 | 2.59 | 1.18E-09 |
| <i>C10orf128</i>   | ENSG00000204161 | 2.59 | 1.23E-04 |
| <i>LINC00941</i>   | ENSG00000235884 | 2.59 | 3.00E-02 |
| <i>CEMIP</i>       | ENSG00000103888 | 2.59 | 1.00E-02 |
| <i>LRRN2</i>       | ENSG00000170382 | 2.58 | 2.00E-02 |
| <i>ITGAM</i>       | ENSG00000169896 | 2.57 | 1.69E-03 |
| <i>IL9R</i>        | ENSG00000124334 | 2.57 | 2.00E-02 |
| <i>ORC6</i>        | ENSG00000091651 | 2.56 | 2.29E-05 |
| <i>KIAA1644</i>    | ENSG00000138944 | 2.56 | 1.34E-03 |
| <i>FHAD1</i>       | ENSG00000142621 | 2.54 | 2.07E-06 |
| <i>CFB</i>         | ENSG00000243649 | 2.54 | 1.16E-08 |
| <i>C4B</i>         | ENSG00000224389 | 2.54 | 1.05E-03 |
| <i>AL139353.1</i>  | ENSG00000203546 | 2.54 | 3.00E-02 |
| <i>CRIP2</i>       | ENSG00000182809 | 2.54 | 9.59E-06 |
| <i>GLCE</i>        | ENSG00000138604 | 2.54 | 5.23E-08 |
| <i>TOE1</i>        | ENSG00000132773 | 2.52 | 3.37E-06 |
| <i>AC025539.1</i>  | ENSG00000251152 | 2.52 | 4.00E-02 |
| <i>C4A</i>         | ENSG00000244731 | 2.52 | 6.85E-03 |
| <i>AC025580.1</i>  | ENSG00000259342 | 2.52 | 2.00E-02 |
| <i>MMRN1</i>       | ENSG00000138722 | 2.51 | 9.65E-04 |
| <i>FGR</i>         | ENSG00000000938 | 2.50 | 3.00E-02 |
| <i>HABP2</i>       | ENSG00000148702 | 2.50 | 1.69E-04 |
| <i>FADS2</i>       | ENSG00000134824 | 2.49 | 1.00E-02 |
| <i>AC020656.2</i>  | ENSG00000274979 | 2.49 | 1.70E-03 |
| <i>ADAMTS4</i>     | ENSG00000158859 | 2.48 | 3.00E-02 |
| <i>ATP1B3</i>      | ENSG00000069849 | 2.48 | 2.97E-07 |
| <i>FOXC1</i>       | ENSG00000054598 | 2.48 | 9.90E-03 |
| <i>PFKP</i>        | ENSG00000067057 | 2.48 | 1.68E-06 |
| <i>AC016542.2</i>  | ENSG00000279502 | 2.48 | 2.00E-02 |
| <i>CDRT1</i>       | ENSG00000241322 | 2.48 | 2.54E-03 |
| <i>AC090229.1</i>  | ENSG00000267397 | 2.48 | 2.00E-02 |

|                   |                 |      |          |
|-------------------|-----------------|------|----------|
| <i>IQCA1</i>      | ENSG00000132321 | 2.47 | 4.00E-02 |
| <i>CADM3-AS1</i>  | ENSG00000225670 | 2.46 | 2.00E-02 |
| <i>MEOX1</i>      | ENSG00000005102 | 2.46 | 2.55E-03 |
| <i>NCF1</i>       | ENSG00000158517 | 2.45 | 5.89E-03 |
| <i>DOC2B</i>      | ENSG00000272636 | 2.45 | 1.00E-02 |
| <i>NRXN3</i>      | ENSG00000021645 | 2.43 | 2.00E-02 |
| <i>MME</i>        | ENSG00000196549 | 2.42 | 5.00E-02 |
| <i>SLC39A8</i>    | ENSG00000138821 | 2.42 | 1.73E-04 |
| <i>CXCL2</i>      | ENSG00000081041 | 2.41 | 4.00E-02 |
| <i>ANXA2</i>      | ENSG00000182718 | 2.41 | 4.73E-06 |
| <i>ATF3</i>       | ENSG00000162772 | 2.40 | 1.07E-04 |
| <i>MUC6</i>       | ENSG00000184956 | 2.39 | 6.85E-03 |
| <i>RGS18</i>      | ENSG00000150681 | 2.38 | 1.00E-02 |
| <i>HRH1</i>       | ENSG00000196639 | 2.38 | 1.79E-06 |
| <i>GABRP</i>      | ENSG00000094755 | 2.38 | 4.00E-02 |
| <i>AC083837.1</i> | ENSG00000261618 | 2.38 | 2.00E-02 |
| <i>LINC00857</i>  | ENSG00000237523 | 2.38 | 8.42E-03 |
| <i>NNMT</i>       | ENSG00000166741 | 2.38 | 6.41E-03 |
| <i>OSBPL3</i>     | ENSG00000070882 | 2.37 | 3.33E-09 |
| <i>IL3RA</i>      | ENSG00000185291 | 2.37 | 3.20E-03 |
| <i>AL031283.1</i> | ENSG00000228140 | 2.35 | 2.00E-02 |
| <i>GNAI4</i>      | ENSG00000156049 | 2.35 | 1.00E-02 |
| <i>LDHA</i>       | ENSG00000134333 | 2.35 | 1.77E-07 |
| <i>TM4SF1</i>     | ENSG00000169908 | 2.34 | 1.49E-04 |
| <i>KIAA1211</i>   | ENSG00000109265 | 2.34 | 4.20E-03 |
| <i>AC006064.4</i> | ENSG00000269968 | 2.34 | 3.00E-02 |
| <i>MYOF</i>       | ENSG00000138119 | 2.33 | 5.43E-07 |
| <i>RAB31</i>      | ENSG00000168461 | 2.33 | 5.61E-08 |
| <i>SNORA80B</i>   | ENSG00000206633 | 2.32 | 3.00E-02 |
| <i>AC005062.1</i> | ENSG00000243004 | 2.32 | 3.00E-02 |
| <i>IQCH</i>       | ENSG00000103599 | 2.31 | 8.73E-04 |
| <i>ITGAX</i>      | ENSG00000140678 | 2.31 | 7.38E-03 |
| <i>AC016542.3</i> | ENSG00000280166 | 2.30 | 3.00E-02 |
| <i>NFIL3</i>      | ENSG00000165030 | 2.29 | 1.10E-04 |
| <i>CIDEB</i>      | ENSG00000136305 | 2.29 | 1.33E-03 |
| <i>AC092718.8</i> | ENSG00000284512 | 2.29 | 5.00E-02 |
| <i>SLC38A1</i>    | ENSG00000111371 | 2.27 | 4.78E-05 |
| <i>FAM155A</i>    | ENSG00000204442 | 2.27 | 1.00E-02 |
| <i>LILRB2</i>     | ENSG00000131042 | 2.27 | 1.00E-02 |
| <i>PLA2G7</i>     | ENSG00000146070 | 2.26 | 4.00E-02 |
| <i>NIPA1</i>      | ENSG00000170113 | 2.26 | 3.32E-06 |
| <i>AC021483.2</i> | ENSG00000261229 | 2.26 | 2.00E-02 |
| <i>HAS3</i>       | ENSG00000103044 | 2.26 | 1.00E-02 |
| <i>ATP2C2-AS1</i> | ENSG00000261286 | 2.25 | 2.00E-02 |

|                    |                 |      |          |
|--------------------|-----------------|------|----------|
| <i>BTK</i>         | ENSG00000010671 | 2.25 | 5.24E-03 |
| <i>AC239798.4</i>  | ENSG00000273213 | 2.24 | 2.00E-02 |
| <i>ITGA10</i>      | ENSG00000143127 | 2.24 | 9.53E-03 |
| <i>CCL11</i>       | ENSG00000172156 | 2.24 | 2.00E-02 |
| <i>APOL2</i>       | ENSG00000128335 | 2.24 | 1.54E-04 |
| <i>CARD11</i>      | ENSG00000198286 | 2.23 | 1.02E-03 |
| <i>TPST1</i>       | ENSG00000169902 | 2.23 | 6.31E-06 |
| <i>PDCD1LG2</i>    | ENSG00000197646 | 2.23 | 3.00E-02 |
| <i>GPRC5A</i>      | ENSG00000013588 | 2.23 | 9.79E-06 |
| <i>CSF2RB</i>      | ENSG00000100368 | 2.23 | 3.85E-03 |
| <i>PKM</i>         | ENSG00000067225 | 2.22 | 4.06E-06 |
| <i>SEMA7A</i>      | ENSG00000138623 | 2.22 | 2.00E-02 |
| <i>SERTAD4-AS1</i> | ENSG00000203706 | 2.21 | 2.00E-02 |
| <i>TNFRSF11A</i>   | ENSG00000141655 | 2.21 | 1.01E-04 |
| <i>MASP1</i>       | ENSG00000127241 | 2.20 | 5.00E-02 |
| <i>ZC3H12D</i>     | ENSG00000178199 | 2.20 | 2.00E-02 |
| <i>AC007364.1</i>  | ENSG00000231969 | 2.19 | 4.00E-02 |
| <i>BDNF</i>        | ENSG00000176697 | 2.19 | 2.00E-02 |
| <i>SLFN11</i>      | ENSG00000172716 | 2.19 | 9.05E-05 |
| <i>CYSLTR1</i>     | ENSG00000173198 | 2.19 | 7.96E-03 |
| <i>KCNAB1</i>      | ENSG00000169282 | 2.18 | 3.36E-03 |
| <i>GSN</i>         | ENSG00000148180 | 2.18 | 8.57E-04 |
| <i>OSMR</i>        | ENSG00000145623 | 2.17 | 3.79E-06 |
| <i>AHCYL2</i>      | ENSG00000158467 | 2.17 | 2.81E-05 |
| <i>LINC00896</i>   | ENSG00000236499 | 2.17 | 2.00E-02 |
| <i>ALPL</i>        | ENSG00000162551 | 2.16 | 5.00E-02 |
| <i>CYR61</i>       | ENSG00000142871 | 2.16 | 5.00E-02 |
| <i>ACKR1</i>       | ENSG00000213088 | 2.16 | 2.00E-02 |
| <i>TBC1D1</i>      | ENSG00000065882 | 2.16 | 1.37E-07 |
| <i>GPRIN1</i>      | ENSG00000169258 | 2.16 | 4.00E-02 |
| <i>MEIS1-AS2</i>   | ENSG00000230749 | 2.15 | 5.00E-02 |
| <i>SSFA2</i>       | ENSG00000138434 | 2.15 | 2.02E-04 |
| <i>VEPH1</i>       | ENSG00000197415 | 2.15 | 4.00E-02 |
| <i>ANKDD1B</i>     | ENSG00000189045 | 2.15 | 9.08E-03 |
| <i>SAMSN1</i>      | ENSG00000155307 | 2.15 | 2.10E-03 |
| <i>SHC3</i>        | ENSG00000148082 | 2.14 | 5.00E-02 |
| <i>AL390774.2</i>  | ENSG00000230826 | 2.14 | 5.00E-02 |
| <i>ARNTL</i>       | ENSG00000133794 | 2.14 | 5.03E-04 |
| <i>EMPI</i>        | ENSG00000134531 | 2.14 | 1.09E-03 |
| <i>MTHFS</i>       | ENSG00000136371 | 2.14 | 1.79E-06 |
| <i>AP001625.2</i>  | ENSG00000235772 | 2.14 | 4.00E-02 |
| <i>UBXN10</i>      | ENSG00000162543 | 2.13 | 3.00E-02 |
| <i>ALOX5</i>       | ENSG00000012779 | 2.13 | 1.09E-03 |
| <i>SORD</i>        | ENSG00000140263 | 2.13 | 2.80E-05 |

|                   |                 |      |          |
|-------------------|-----------------|------|----------|
| <i>AC090181.2</i> | ENSG00000269951 | 2.13 | 1.00E-02 |
| <i>ENO1</i>       | ENSG00000074800 | 2.12 | 7.02E-05 |
| <i>MIR34AHG</i>   | ENSG00000228526 | 2.12 | 3.28E-03 |
| <i>DGKA</i>       | ENSG00000065357 | 2.12 | 1.09E-03 |
| <i>DUSP10</i>     | ENSG00000143507 | 2.11 | 1.19E-03 |
| <i>AGT</i>        | ENSG00000135744 | 2.11 | 1.00E-02 |
| <i>C15orf48</i>   | ENSG00000166920 | 2.11 | 5.86E-04 |
| <i>SIGLEC6</i>    | ENSG00000105492 | 2.11 | 3.00E-02 |
| <i>SNPH</i>       | ENSG00000101298 | 2.11 | 4.02E-04 |
| <i>LSAMP</i>      | ENSG00000185565 | 2.10 | 1.00E-02 |
| <i>TLL1</i>       | ENSG00000038295 | 2.10 | 2.00E-02 |
| <i>TBXAS1</i>     | ENSG00000059377 | 2.10 | 1.36E-04 |
| <i>PRSS3</i>      | ENSG00000010438 | 2.10 | 3.29E-03 |
| <i>ZNF438</i>     | ENSG00000183621 | 2.10 | 5.04E-04 |
| <i>KYNU</i>       | ENSG00000115919 | 2.09 | 3.00E-02 |
| <i>AKR1C1</i>     | ENSG00000187134 | 2.09 | 3.63E-03 |
| <i>CD209</i>      | ENSG00000090659 | 2.09 | 3.00E-02 |
| <i>STN1</i>       | ENSG00000107960 | 2.08 | 1.24E-05 |
| <i>CAVIN3</i>     | ENSG00000170955 | 2.08 | 6.93E-04 |
| <i>CD44</i>       | ENSG00000026508 | 2.08 | 1.32E-04 |
| <i>P2RY2</i>      | ENSG00000175591 | 2.08 | 4.00E-02 |
| <i>SMOX</i>       | ENSG00000088826 | 2.08 | 3.00E-02 |
| <i>S100A16</i>    | ENSG00000188643 | 2.07 | 1.35E-04 |
| <i>COL7A1</i>     | ENSG00000114270 | 2.07 | 2.14E-03 |
| <i>TPK1</i>       | ENSG00000196511 | 2.07 | 2.96E-03 |
| <i>KRT19</i>      | ENSG00000171345 | 2.07 | 2.00E-02 |
| <i>ETS2</i>       | ENSG00000157557 | 2.07 | 5.94E-08 |
| <i>SLC22A3</i>    | ENSG00000146477 | 2.06 | 6.08E-04 |
| <i>FMNL2</i>      | ENSG00000157827 | 2.05 | 6.72E-05 |
| <i>F2R</i>        | ENSG00000181104 | 2.05 | 1.40E-03 |
| <i>AGPAT4</i>     | ENSG00000026652 | 2.05 | 3.74E-03 |
| <i>LRMP</i>       | ENSG00000118308 | 2.05 | 4.06E-03 |
| <i>MUC13</i>      | ENSG00000173702 | 2.04 | 1.00E-02 |
| <i>HK1</i>        | ENSG00000156515 | 2.04 | 4.05E-04 |
| <i>AC025569.1</i> | ENSG00000258168 | 2.04 | 4.00E-02 |
| <i>DOCK9</i>      | ENSG00000088387 | 2.04 | 1.11E-04 |
| <i>AC090181.3</i> | ENSG00000278991 | 2.04 | 1.00E-02 |
| <i>BCL2L15</i>    | ENSG00000188761 | 2.03 | 1.65E-05 |
| <i>KIAA0513</i>   | ENSG00000135709 | 2.03 | 1.38E-03 |
| <i>G6PD</i>       | ENSG00000160211 | 2.03 | 4.73E-03 |
| <i>BCYRN1</i>     | ENSG00000236824 | 2.02 | 2.00E-02 |
| <i>TCIM</i>       | ENSG00000176907 | 2.02 | 2.00E-02 |
| <i>AFAP1-AS1</i>  | ENSG00000272620 | 2.01 | 5.00E-02 |
| <i>CCND3</i>      | ENSG00000112576 | 2.01 | 6.98E-04 |

|                   |                 |       |          |
|-------------------|-----------------|-------|----------|
| <i>LPCAT1</i>     | ENSG00000153395 | 2.00  | 1.14E-03 |
| <i>PLEKHB1</i>    | ENSG00000021300 | 2.00  | 2.67E-04 |
| <i>CSRNP3</i>     | ENSG00000178662 | -2.00 | 3.85E-03 |
| <i>GPX3</i>       | ENSG00000211445 | -2.00 | 5.12E-03 |
| <i>FAM135B</i>    | ENSG00000147724 | -2.01 | 4.00E-02 |
| <i>BARX1</i>      | ENSG00000131668 | -2.01 | 5.00E-02 |
| <i>TM7SF2</i>     | ENSG00000149809 | -2.01 | 2.00E-02 |
| <i>PTMS</i>       | ENSG00000159335 | -2.01 | 2.91E-03 |
| <i>PDZK1</i>      | ENSG00000174827 | -2.02 | 3.00E-02 |
| <i>CYFIP2</i>     | ENSG00000055163 | -2.02 | 5.00E-02 |
| <i>KLHL32</i>     | ENSG00000186231 | -2.02 | 5.00E-02 |
| <i>NFIX</i>       | ENSG00000008441 | -2.02 | 2.69E-04 |
| <i>ZNF512B</i>    | ENSG00000196700 | -2.02 | 1.38E-03 |
| <i>FAHD2B</i>     | ENSG00000144199 | -2.03 | 2.03E-03 |
| <i>ZAP70</i>      | ENSG00000115085 | -2.03 | 2.00E-02 |
| <i>PSD</i>        | ENSG00000059915 | -2.03 | 5.00E-02 |
| <i>MS4A8</i>      | ENSG00000166959 | -2.03 | 3.00E-02 |
| <i>MAP6</i>       | ENSG00000171533 | -2.03 | 3.00E-02 |
| <i>SSTR1</i>      | ENSG00000139874 | -2.03 | 4.21E-03 |
| <i>GDPD1</i>      | ENSG00000153982 | -2.03 | 1.11E-04 |
| <i>ZNF677</i>     | ENSG00000197928 | -2.03 | 2.13E-04 |
| <i>TMEM47</i>     | ENSG00000147027 | -2.03 | 1.33E-03 |
| <i>NR2F1</i>      | ENSG00000175745 | -2.04 | 2.00E-02 |
| <i>CDKN1C</i>     | ENSG00000129757 | -2.04 | 3.00E-02 |
| <i>IL2RB</i>      | ENSG00000100385 | -2.04 | 4.00E-02 |
| <i>AL031587.5</i> | ENSG00000278948 | -2.04 | 4.00E-02 |
| <i>OBSCN</i>      | ENSG00000154358 | -2.05 | 1.00E-02 |
| <i>AAMDC</i>      | ENSG00000087884 | -2.05 | 2.05E-04 |
| <i>HSPA2</i>      | ENSG00000126803 | -2.05 | 2.00E-03 |
| <i>CD2</i>        | ENSG00000116824 | -2.06 | 6.08E-03 |
| <i>CD247</i>      | ENSG00000198821 | -2.06 | 4.00E-02 |
| <i>RNF150</i>     | ENSG00000170153 | -2.06 | 2.00E-02 |
| <i>CD3E</i>       | ENSG00000198851 | -2.06 | 3.00E-02 |
| <i>AC004656.1</i> | ENSG00000260822 | -2.06 | 2.85E-03 |
| <i>BEX2</i>       | ENSG00000133134 | -2.06 | 3.00E-02 |
| <i>RAB9B</i>      | ENSG00000123570 | -2.06 | 9.90E-03 |
| <i>LINC00865</i>  | ENSG00000232229 | -2.07 | 2.35E-03 |
| <i>IRS2</i>       | ENSG00000185950 | -2.07 | 2.60E-03 |
| <i>ZNF626</i>     | ENSG00000188171 | -2.07 | 3.47E-05 |
| <i>AP001062.1</i> | ENSG00000184441 | -2.07 | 2.00E-02 |
| <i>WASF3</i>      | ENSG00000132970 | -2.09 | 8.46E-03 |
| <i>ASPG</i>       | ENSG00000166183 | -2.09 | 2.00E-02 |
| <i>SEC14L5</i>    | ENSG00000103184 | -2.09 | 4.83E-03 |
| <i>CU633906.1</i> | ENSG00000275496 | -2.09 | 1.00E-02 |



|                    |                 |       |          |
|--------------------|-----------------|-------|----------|
| <i>NR1D2</i>       | ENSG00000174738 | -2.10 | 2.30E-03 |
| <i>IGSF10</i>      | ENSG00000152580 | -2.10 | 4.00E-02 |
| <i>FUT9</i>        | ENSG00000172461 | -2.10 | 3.92E-03 |
| <i>SLITRK6</i>     | ENSG00000184564 | -2.10 | 2.66E-03 |
| <i>GNG2</i>        | ENSG00000186469 | -2.10 | 3.78E-04 |
| <i>SEPT5</i>       | ENSG00000184702 | -2.10 | 2.00E-02 |
| <i>ZNRF3</i>       | ENSG00000183579 | -2.10 | 3.84E-03 |
| <i>RIMS3</i>       | ENSG00000117016 | -2.11 | 2.00E-02 |
| <i>NPIPA2</i>      | ENSG00000254852 | -2.11 | 3.00E-02 |
| <i>SYT17</i>       | ENSG00000103528 | -2.11 | 5.15E-03 |
| <i>KLHL13</i>      | ENSG00000003096 | -2.11 | 8.46E-03 |
| <i>GRIN2A</i>      | ENSG00000183454 | -2.12 | 2.00E-02 |
| <i>MSH5-SAPCD1</i> | ENSG00000255152 | -2.14 | 4.73E-03 |
| <i>MAMDC2</i>      | ENSG00000165072 | -2.14 | 2.00E-02 |
| <i>ZNF726</i>      | ENSG00000213967 | -2.14 | 2.00E-02 |
| <i>NCMAP</i>       | ENSG00000184454 | -2.15 | 2.00E-02 |
| <i>DGKG</i>        | ENSG00000058866 | -2.16 | 1.00E-02 |
| <i>CSPG4</i>       | ENSG00000173546 | -2.16 | 7.10E-04 |
| <i>GATA5</i>       | ENSG00000130700 | -2.16 | 1.00E-02 |
| <i>COL16A1</i>     | ENSG00000084636 | -2.17 | 2.16E-03 |
| <i>ASPA</i>        | ENSG00000108381 | -2.17 | 2.15E-03 |
| <i>PAPSS1</i>      | ENSG00000138801 | -2.18 | 2.94E-07 |
| <i>RTN1</i>        | ENSG00000139970 | -2.18 | 1.00E-02 |
| <i>PRX</i>         | ENSG00000105227 | -2.18 | 3.00E-02 |
| <i>SULT1B1</i>     | ENSG00000173597 | -2.19 | 2.70E-03 |
| <i>EIF4EBP3</i>    | ENSG00000243056 | -2.19 | 1.00E-02 |
| <i>GFRA1</i>       | ENSG00000151892 | -2.19 | 2.07E-03 |
| <i>TSPOAP1</i>     | ENSG00000005379 | -2.19 | 4.05E-04 |
| <i>PGR</i>         | ENSG00000082175 | -2.20 | 3.00E-02 |
| <i>FAM20C</i>      | ENSG00000177706 | -2.21 | 4.03E-03 |
| <i>SLC7A2</i>      | ENSG00000003989 | -2.21 | 1.00E-02 |
| <i>COL27A1</i>     | ENSG00000196739 | -2.21 | 7.60E-05 |
| <i>DUSP19</i>      | ENSG00000162999 | -2.22 | 2.71E-03 |
| <i>SUCNR1</i>      | ENSG00000198829 | -2.22 | 4.00E-02 |
| <i>MACROD1</i>     | ENSG00000133315 | -2.22 | 7.52E-04 |
| <i>PER1</i>        | ENSG00000179094 | -2.22 | 4.00E-02 |
| <i>PER3</i>        | ENSG00000049246 | -2.23 | 5.04E-04 |
| <i>NUPRI</i>       | ENSG00000176046 | -2.23 | 2.00E-02 |
| <i>ANGPT1</i>      | ENSG00000154188 | -2.24 | 7.55E-04 |
| <i>KLRK1</i>       | ENSG00000213809 | -2.24 | 3.00E-02 |
| <i>RIMBP2</i>      | ENSG00000060709 | -2.24 | 3.00E-02 |
| <i>SYP</i>         | ENSG00000102003 | -2.24 | 1.00E-02 |
| <i>ACVR1C</i>      | ENSG00000123612 | -2.25 | 7.32E-05 |
| <i>GPR158</i>      | ENSG00000151025 | -2.25 | 2.00E-02 |

|                   |                 |       |          |
|-------------------|-----------------|-------|----------|
| <i>PEG10</i>      | ENSG00000242265 | -2.26 | 1.00E-02 |
| <i>ADGRG5</i>     | ENSG00000159618 | -2.26 | 4.06E-03 |
| <i>ZNF835</i>     | ENSG00000127903 | -2.26 | 4.00E-02 |
| <i>HHIP-AS1</i>   | ENSG00000248890 | -2.27 | 4.00E-02 |
| <i>ZIK1</i>       | ENSG00000171649 | -2.28 | 1.24E-05 |
| <i>ADAMTS5</i>    | ENSG00000154736 | -2.28 | 3.71E-04 |
| <i>SCML2</i>      | ENSG00000102098 | -2.29 | 3.00E-02 |
| <i>AUTS2</i>      | ENSG00000158321 | -2.30 | 2.00E-02 |
| <i>CFAP46</i>     | ENSG00000171811 | -2.30 | 1.60E-03 |
| <i>KLRC1</i>      | ENSG00000134545 | -2.30 | 3.00E-02 |
| <i>BHLHE41</i>    | ENSG00000123095 | -2.30 | 3.00E-02 |
| <i>SCAMP5</i>     | ENSG00000198794 | -2.30 | 3.31E-04 |
| <i>PDZD4</i>      | ENSG00000067840 | -2.30 | 5.00E-02 |
| <i>PRLR</i>       | ENSG00000113494 | -2.31 | 5.22E-07 |
| <i>ST3GAL1</i>    | ENSG00000008513 | -2.31 | 1.00E-02 |
| <i>BRSK2</i>      | ENSG00000174672 | -2.32 | 1.00E-02 |
| <i>GRIA4</i>      | ENSG00000152578 | -2.32 | 4.00E-02 |
| <i>BAIAP3</i>     | ENSG00000007516 | -2.33 | 1.00E-02 |
| <i>ZFPM1</i>      | ENSG00000179588 | -2.33 | 1.33E-03 |
| <i>GHR</i>        | ENSG00000112964 | -2.34 | 2.00E-02 |
| <i>ZNF579</i>     | ENSG00000218891 | -2.34 | 2.00E-02 |
| <i>CELSR1</i>     | ENSG00000075275 | -2.34 | 9.76E-06 |
| <i>TMEM35A</i>    | ENSG00000126950 | -2.34 | 5.00E-02 |
| <i>PTGFR</i>      | ENSG00000122420 | -2.35 | 6.83E-03 |
| <i>STK32B</i>     | ENSG00000152953 | -2.35 | 4.97E-03 |
| <i>NEURL1</i>     | ENSG00000107954 | -2.35 | 4.76E-04 |
| <i>SYT8</i>       | ENSG00000149043 | -2.35 | 3.00E-02 |
| <i>AC084859.1</i> | ENSG00000254670 | -2.35 | 4.89E-03 |
| <i>SYT1</i>       | ENSG00000067715 | -2.36 | 3.00E-02 |
| <i>SPATC1L</i>    | ENSG00000160284 | -2.36 | 2.00E-02 |
| <i>QPCT</i>       | ENSG00000115828 | -2.37 | 7.28E-03 |
| <i>TMEM171</i>    | ENSG00000157111 | -2.37 | 2.15E-05 |
| <i>KCNQ3</i>      | ENSG00000184156 | -2.37 | 4.00E-02 |
| <i>SEZ6L2</i>     | ENSG00000174938 | -2.37 | 1.19E-03 |
| <i>CSTA</i>       | ENSG00000121552 | -2.38 | 4.32E-03 |
| <i>CCL5</i>       | ENSG00000271503 | -2.38 | 7.45E-03 |
| <i>AC093227.1</i> | ENSG00000267152 | -2.38 | 4.00E-02 |
| <i>CD8A</i>       | ENSG00000153563 | -2.39 | 6.18E-04 |
| <i>ENPP6</i>      | ENSG00000164303 | -2.40 | 4.00E-03 |
| <i>DACT2</i>      | ENSG00000164488 | -2.40 | 4.00E-02 |
| <i>TUSC3</i>      | ENSG00000104723 | -2.40 | 1.06E-06 |
| <i>LINC00982</i>  | ENSG00000177133 | -2.41 | 2.83E-03 |
| <i>DPT</i>        | ENSG00000143196 | -2.41 | 2.00E-02 |
| <i>ZMIZ1-AS1</i>  | ENSG00000224596 | -2.41 | 4.00E-02 |

|                   |                 |       |          |
|-------------------|-----------------|-------|----------|
| <i>OAF</i>        | ENSG00000184232 | -2.41 | 9.82E-05 |
| <i>RUNDC3A</i>    | ENSG00000108309 | -2.41 | 2.00E-02 |
| <i>HIF3A</i>      | ENSG00000124440 | -2.41 | 4.00E-02 |
| <i>CLGN</i>       | ENSG00000153132 | -2.42 | 3.00E-02 |
| <i>PNPLA7</i>     | ENSG00000130653 | -2.42 | 9.98E-05 |
| <i>FP565324.1</i> | ENSG00000283199 | -2.42 | 2.00E-02 |
| <i>ZNF667</i>     | ENSG00000198046 | -2.42 | 1.00E-02 |
| <i>TMPRSS6</i>    | ENSG00000187045 | -2.42 | 1.00E-02 |
| <i>TEF</i>        | ENSG00000167074 | -2.42 | 1.74E-03 |
| <i>IL7R</i>       | ENSG00000168685 | -2.43 | 1.09E-03 |
| <i>THEMIS</i>     | ENSG00000172673 | -2.43 | 2.72E-03 |
| <i>PRKAG2-AS1</i> | ENSG00000239911 | -2.43 | 3.00E-02 |
| <i>RIMS2</i>      | ENSG00000176406 | -2.43 | 4.00E-02 |
| <i>MT1X</i>       | ENSG00000187193 | -2.43 | 1.00E-02 |
| <i>OTUD1</i>      | ENSG00000165312 | -2.44 | 9.97E-05 |
| <i>AL365181.2</i> | ENSG00000272068 | -2.45 | 4.00E-02 |
| <i>PDE6B</i>      | ENSG00000133256 | -2.45 | 8.44E-03 |
| <i>RASSF10</i>    | ENSG00000189431 | -2.45 | 3.35E-05 |
| <i>GUCY2C</i>     | ENSG00000070019 | -2.45 | 1.00E-02 |
| <i>CCDC169</i>    | ENSG00000242715 | -2.45 | 1.00E-02 |
| <i>ZNF667-AS1</i> | ENSG00000166770 | -2.45 | 4.41E-03 |
| <i>AATBC</i>      | ENSG00000215458 | -2.45 | 3.00E-02 |
| <i>STXBP5L</i>    | ENSG00000145087 | -2.46 | 1.09E-03 |
| <i>AC139491.2</i> | ENSG00000248596 | -2.46 | 2.45E-03 |
| <i>ZNF257</i>     | ENSG00000197134 | -2.46 | 1.05E-03 |
| <i>ZNF135</i>     | ENSG00000176293 | -2.46 | 1.74E-03 |
| <i>NR1H4</i>      | ENSG00000012504 | -2.47 | 3.00E-02 |
| <i>NR1I2</i>      | ENSG00000144852 | -2.48 | 3.97E-03 |
| <i>RGS6</i>       | ENSG00000182732 | -2.48 | 5.00E-02 |
| <i>KCNE2</i>      | ENSG00000159197 | -2.48 | 5.00E-02 |
| <i>CELF3</i>      | ENSG00000159409 | -2.49 | 2.00E-02 |
| <i>TRIM73</i>     | ENSG00000178809 | -2.49 | 2.00E-02 |
| <i>PNMA2</i>      | ENSG00000240694 | -2.49 | 3.39E-03 |
| <i>NKX6-3</i>     | ENSG00000165066 | -2.49 | 2.00E-02 |
| <i>ADIRF-AS1</i>  | ENSG00000272734 | -2.49 | 1.00E-02 |
| <i>MS1I</i>       | ENSG00000135097 | -2.49 | 2.00E-02 |
| <i>SDK2</i>       | ENSG00000069188 | -2.49 | 3.77E-03 |
| <i>SAMD13</i>     | ENSG00000203943 | -2.50 | 3.56E-05 |
| <i>PFN2</i>       | ENSG00000070087 | -2.50 | 1.37E-08 |
| <i>ADAMTSL2</i>   | ENSG00000197859 | -2.50 | 7.92E-03 |
| <i>LINC00638</i>  | ENSG00000258701 | -2.50 | 4.00E-02 |
| <i>PIWIL2</i>     | ENSG00000197181 | -2.51 | 6.07E-05 |
| <i>OLFM1</i>      | ENSG00000130558 | -2.51 | 4.33E-04 |
| <i>INA</i>        | ENSG00000148798 | -2.51 | 5.00E-02 |

|                   |                 |       |          |
|-------------------|-----------------|-------|----------|
| <i>KCNJ6</i>      | ENSG00000157542 | -2.51 | 4.00E-02 |
| <i>MYCL</i>       | ENSG00000116990 | -2.52 | 3.59E-05 |
| <i>LHFPL4</i>     | ENSG00000156959 | -2.52 | 4.00E-02 |
| <i>ARHGAP20</i>   | ENSG00000137727 | -2.52 | 9.32E-05 |
| <i>HTR7</i>       | ENSG00000148680 | -2.53 | 2.00E-02 |
| <i>SERPINA4</i>   | ENSG00000100665 | -2.53 | 6.77E-03 |
| <i>AC097468.1</i> | ENSG00000224090 | -2.54 | 2.00E-02 |
| <i>AC010998.3</i> | ENSG00000278484 | -2.54 | 5.00E-02 |
| <i>OGN</i>        | ENSG00000106809 | -2.55 | 8.09E-03 |
| <i>RAB26</i>      | ENSG00000167964 | -2.55 | 3.54E-04 |
| <i>LIMS3</i>      | ENSG00000256977 | -2.56 | 3.00E-02 |
| <i>NPM2</i>       | ENSG00000158806 | -2.56 | 2.00E-02 |
| <i>ENHO</i>       | ENSG00000168913 | -2.56 | 4.95E-03 |
| <i>FAM181B</i>    | ENSG00000182103 | -2.56 | 3.00E-02 |
| <i>SCN8A</i>      | ENSG00000196876 | -2.58 | 9.79E-05 |
| <i>MEGF6</i>      | ENSG00000162591 | -2.59 | 2.40E-04 |
| <i>ISL1</i>       | ENSG00000016082 | -2.59 | 7.72E-05 |
| <i>RGN</i>        | ENSG00000130988 | -2.59 | 2.00E-02 |
| <i>CACNA2D1</i>   | ENSG00000153956 | -2.60 | 9.26E-10 |
| <i>RAP1GAP</i>    | ENSG00000076864 | -2.61 | 6.00E-03 |
| <i>KIF1A</i>      | ENSG00000130294 | -2.61 | 6.10E-03 |
| <i>CPE</i>        | ENSG00000109472 | -2.61 | 7.72E-05 |
| <i>COLEC12</i>    | ENSG00000158270 | -2.61 | 3.56E-05 |
| <i>CD8B</i>       | ENSG00000172116 | -2.62 | 8.66E-03 |
| <i>FGF14</i>      | ENSG00000102466 | -2.62 | 2.67E-03 |
| <i>TPH1</i>       | ENSG00000129167 | -2.63 | 3.93E-03 |
| <i>ZSCAN4</i>     | ENSG00000180532 | -2.63 | 2.00E-02 |
| <i>CXorf57</i>    | ENSG00000147231 | -2.63 | 3.95E-06 |
| <i>PCSK1</i>      | ENSG00000175426 | -2.64 | 5.05E-04 |
| <i>VEGFB</i>      | ENSG00000173511 | -2.64 | 3.58E-04 |
| <i>SSPN</i>       | ENSG00000123096 | -2.64 | 7.62E-06 |
| <i>AMIGO2</i>     | ENSG00000139211 | -2.65 | 4.04E-03 |
| <i>ZNF610</i>     | ENSG00000167554 | -2.65 | 4.21E-04 |
| <i>DPP6</i>       | ENSG00000130226 | -2.66 | 2.00E-02 |
| <i>ASAH2</i>      | ENSG00000188611 | -2.66 | 2.41E-03 |
| <i>MFAP5</i>      | ENSG00000197614 | -2.66 | 2.38E-03 |
| <i>ABCA8</i>      | ENSG00000141338 | -2.66 | 2.21E-03 |
| <i>SVOP</i>       | ENSG00000166111 | -2.67 | 2.00E-02 |
| <i>PMP2</i>       | ENSG00000147588 | -2.69 | 3.00E-02 |
| <i>GNLY</i>       | ENSG00000115523 | -2.70 | 2.00E-02 |
| <i>CLSTN2</i>     | ENSG00000158258 | -2.70 | 1.31E-04 |
| <i>CDO1</i>       | ENSG00000129596 | -2.70 | 2.00E-02 |
| <i>RPS6KA6</i>    | ENSG00000072133 | -2.70 | 1.13E-06 |
| <i>TPCN2</i>      | ENSG00000162341 | -2.71 | 1.00E-02 |

|                   |                 |       |          |
|-------------------|-----------------|-------|----------|
| <i>PPM1E</i>      | ENSG00000175175 | -2.72 | 5.00E-02 |
| <i>CA11</i>       | ENSG00000063180 | -2.72 | 2.85E-03 |
| <i>VWA5B2</i>     | ENSG00000145198 | -2.73 | 9.44E-03 |
| <i>LHFPL3</i>     | ENSG00000187416 | -2.73 | 5.00E-02 |
| <i>FXYD1</i>      | ENSG00000266964 | -2.74 | 5.00E-02 |
| <i>NKX3-2</i>     | ENSG00000109705 | -2.75 | 4.00E-02 |
| <i>NPY1R</i>      | ENSG00000164128 | -2.75 | 2.81E-03 |
| <i>GRIP2</i>      | ENSG00000144596 | -2.76 | 2.81E-05 |
| <i>AC011503.2</i> | ENSG00000269397 | -2.76 | 6.45E-03 |
| <i>RYR1</i>       | ENSG00000196218 | -2.76 | 2.35E-03 |
| <i>C22orf42</i>   | ENSG00000205856 | -2.76 | 4.00E-02 |
| <i>UST</i>        | ENSG00000111962 | -2.77 | 9.38E-05 |
| <i>GATM</i>       | ENSG00000171766 | -2.77 | 5.05E-11 |
| <i>UBE2QL1</i>    | ENSG00000215218 | -2.78 | 2.00E-02 |
| <i>NOLA</i>       | ENSG00000101746 | -2.78 | 2.00E-02 |
| <i>CXXC4</i>      | ENSG00000168772 | -2.79 | 6.98E-04 |
| <i>ROBO3</i>      | ENSG00000154134 | -2.79 | 7.68E-03 |
| <i>SLC1A7</i>     | ENSG00000162383 | -2.80 | 2.00E-02 |
| <i>VANGL2</i>     | ENSG00000162738 | -2.80 | 8.32E-04 |
| <i>CASR</i>       | ENSG00000036828 | -2.80 | 2.00E-02 |
| <i>RFX6</i>       | ENSG00000185002 | -2.80 | 1.00E-02 |
| <i>LINC00958</i>  | ENSG00000251381 | -2.80 | 3.92E-03 |
| <i>MAPK8IP2</i>   | ENSG00000008735 | -2.80 | 1.00E-02 |
| <i>NYAP1</i>      | ENSG00000166924 | -2.81 | 2.00E-02 |
| <i>CHRM4</i>      | ENSG00000180720 | -2.81 | 5.00E-02 |
| <i>ZNF185</i>     | ENSG00000147394 | -2.81 | 1.40E-06 |
| <i>MGAM</i>       | ENSG00000257335 | -2.82 | 2.00E-03 |
| <i>CHGA</i>       | ENSG00000100604 | -2.82 | 2.58E-04 |
| <i>KNDC1</i>      | ENSG00000171798 | -2.83 | 2.00E-02 |
| <i>CD3G</i>       | ENSG00000160654 | -2.84 | 3.38E-06 |
| <i>ASCL1</i>      | ENSG00000139352 | -2.85 | 5.02E-03 |
| <i>LRAT</i>       | ENSG00000121207 | -2.86 | 1.00E-02 |
| <i>GSTA2</i>      | ENSG00000244067 | -2.86 | 2.00E-02 |
| <i>EPHB6</i>      | ENSG00000106123 | -2.86 | 3.26E-03 |
| <i>PCDH9</i>      | ENSG00000184226 | -2.86 | 9.25E-03 |
| <i>GCK</i>        | ENSG00000106633 | -2.87 | 4.00E-02 |
| <i>NACAD</i>      | ENSG00000136274 | -2.87 | 3.02E-03 |
| <i>SCGB2A1</i>    | ENSG00000124939 | -2.87 | 4.07E-05 |
| <i>DBP</i>        | ENSG00000105516 | -2.87 | 4.66E-05 |
| <i>MPP2</i>       | ENSG00000108852 | -2.88 | 3.12E-04 |
| <i>GNG4</i>       | ENSG00000168243 | -2.89 | 3.69E-03 |
| <i>AGAP11</i>     | ENSG00000271880 | -2.89 | 2.00E-02 |
| <i>MAST1</i>      | ENSG00000105613 | -2.89 | 4.00E-02 |
| <i>PHLDA3</i>     | ENSG00000174307 | -2.90 | 1.05E-03 |

|                    |                 |       |          |
|--------------------|-----------------|-------|----------|
| <i>FAM19A4</i>     | ENSG00000163377 | -2.91 | 4.00E-02 |
| <i>IYD</i>         | ENSG00000009765 | -2.91 | 4.08E-06 |
| <i>CPNE6</i>       | ENSG00000100884 | -2.91 | 3.00E-02 |
| <i>UGT2B7</i>      | ENSG00000171234 | -2.92 | 2.00E-02 |
| <i>CA4</i>         | ENSG00000167434 | -2.92 | 2.00E-02 |
| <i>PLCH2</i>       | ENSG00000149527 | -2.93 | 9.10E-04 |
| <i>RGS4</i>        | ENSG00000117152 | -2.93 | 1.29E-04 |
| <i>DRAIC</i>       | ENSG00000245750 | -2.93 | 1.00E-02 |
| <i>KIF5C</i>       | ENSG00000168280 | -2.94 | 6.35E-05 |
| <i>KCNJ3</i>       | ENSG00000162989 | -2.94 | 3.27E-03 |
| <i>DPP10</i>       | ENSG00000175497 | -2.95 | 7.75E-03 |
| <i>PCSK2</i>       | ENSG00000125851 | -2.95 | 4.42E-03 |
| <i>EEF1A2</i>      | ENSG00000101210 | -2.95 | 4.00E-03 |
| <i>PNMA6A</i>      | ENSG00000235961 | -2.95 | 3.00E-02 |
| <i>GUCA2B</i>      | ENSG00000044012 | -2.96 | 2.00E-02 |
| <i>KCNMB2</i>      | ENSG00000197584 | -2.96 | 9.98E-05 |
| <i>RMST</i>        | ENSG00000255794 | -2.96 | 1.00E-08 |
| <i>KL</i>          | ENSG00000133116 | -2.96 | 1.63E-04 |
| <i>NDNF</i>        | ENSG00000173376 | -2.97 | 4.70E-04 |
| <i>REEP2</i>       | ENSG00000132563 | -2.97 | 9.00E-03 |
| <i>PAX6</i>        | ENSG00000007372 | -2.97 | 3.00E-02 |
| <i>DUSP26</i>      | ENSG00000133878 | -2.98 | 1.07E-03 |
| <i>NELL2</i>       | ENSG00000184613 | -2.98 | 1.00E-02 |
| <i>AJAP1</i>       | ENSG00000196581 | -2.99 | 3.35E-03 |
| <i>CNTN1</i>       | ENSG00000018236 | -2.99 | 5.00E-02 |
| <i>SLC39A5</i>     | ENSG00000139540 | -2.99 | 3.00E-02 |
| <i>LTBP4</i>       | ENSG00000090006 | -2.99 | 2.13E-08 |
| <i>SNAP91</i>      | ENSG00000065609 | -3.00 | 1.00E-02 |
| <i>DCX</i>         | ENSG00000077279 | -3.00 | 6.77E-03 |
| <i>TRPV6</i>       | ENSG00000165125 | -3.01 | 2.07E-03 |
| <i>DSCAML1</i>     | ENSG00000177103 | -3.01 | 3.53E-03 |
| <i>HMGCLL1</i>     | ENSG00000146151 | -3.02 | 2.62E-03 |
| <i>UNC5B-AS1</i>   | ENSG00000237512 | -3.02 | 3.85E-03 |
| <i>KLRC4-KLRK1</i> | ENSG00000255819 | -3.02 | 1.00E-02 |
| <i>KLK11</i>       | ENSG00000167757 | -3.02 | 2.71E-03 |
| <i>CHGB</i>        | ENSG00000089199 | -3.02 | 4.00E-02 |
| <i>F10</i>         | ENSG00000126218 | -3.03 | 2.46E-04 |
| <i>GSG1L</i>       | ENSG00000169181 | -3.03 | 3.00E-02 |
| <i>FOXJ1</i>       | ENSG00000129654 | -3.03 | 2.62E-03 |
| <i>TTR</i>         | ENSG00000118271 | -3.03 | 1.00E-02 |
| <i>TFPI2</i>       | ENSG00000105825 | -3.05 | 3.00E-02 |
| <i>SYN2</i>        | ENSG00000157152 | -3.06 | 4.00E-02 |
| <i>LRRC3B</i>      | ENSG00000179796 | -3.06 | 5.00E-02 |
| <i>ADGRB1</i>      | ENSG00000181790 | -3.06 | 2.04E-03 |

|                   |                 |       |          |
|-------------------|-----------------|-------|----------|
| <i>APOH</i>       | ENSG00000091583 | -3.06 | 3.00E-02 |
| <i>FNDC1</i>      | ENSG00000164694 | -3.07 | 3.00E-02 |
| <i>AC008808.2</i> | ENSG00000250360 | -3.10 | 3.00E-02 |
| <i>IGFBP3</i>     | ENSG00000146674 | -3.11 | 1.33E-10 |
| <i>PID1</i>       | ENSG00000153823 | -3.12 | 4.28E-08 |
| <i>EDARADD</i>    | ENSG00000186197 | -3.14 | 9.31E-06 |
| <i>SLC2A12</i>    | ENSG00000146411 | -3.14 | 2.00E-02 |
| <i>CADM3</i>      | ENSG00000162706 | -3.15 | 1.83E-03 |
| <i>SYT14</i>      | ENSG00000143469 | -3.16 | 4.00E-03 |
| <i>AC130371.2</i> | ENSG00000274370 | -3.16 | 1.00E-02 |
| <i>SLC26A9</i>    | ENSG00000174502 | -3.19 | 1.27E-05 |
| <i>LINC01189</i>  | ENSG00000232827 | -3.20 | 5.00E-02 |
| <i>TMEM151A</i>   | ENSG00000179292 | -3.20 | 2.00E-02 |
| <i>MYOZ3</i>      | ENSG00000164591 | -3.22 | 2.24E-03 |
| <i>AC005520.2</i> | ENSG00000259065 | -3.22 | 2.00E-02 |
| <i>CPS1</i>       | ENSG00000021826 | -3.23 | 3.00E-02 |
| <i>PROX1-AS1</i>  | ENSG00000230461 | -3.24 | 5.00E-02 |
| <i>AC090092.1</i> | ENSG00000255418 | -3.24 | 2.00E-02 |
| <i>RIIAD1</i>     | ENSG00000178796 | -3.25 | 5.00E-02 |
| <i>SSTR2</i>      | ENSG00000180616 | -3.27 | 4.87E-04 |
| <i>AC092652.2</i> | ENSG00000257277 | -3.28 | 4.00E-02 |
| <i>AC021016.3</i> | ENSG00000273361 | -3.28 | 9.18E-04 |
| <i>LGII</i>       | ENSG00000108231 | -3.28 | 3.00E-02 |
| <i>TMEM229A</i>   | ENSG00000234224 | -3.30 | 6.14E-03 |
| <i>ATP13A5</i>    | ENSG00000187527 | -3.32 | 8.47E-03 |
| <i>AC129507.2</i> | ENSG00000262294 | -3.32 | 3.00E-02 |
| <i>ACSM6</i>      | ENSG00000173124 | -3.33 | 2.00E-02 |
| <i>KCNK3</i>      | ENSG00000171303 | -3.34 | 3.04E-04 |
| <i>PTH1R</i>      | ENSG00000160801 | -3.34 | 1.00E-02 |
| <i>AC093627.7</i> | ENSG00000261795 | -3.34 | 4.00E-02 |
| <i>VSTM2L</i>     | ENSG00000132821 | -3.34 | 8.16E-04 |
| <i>GALNT13</i>    | ENSG00000144278 | -3.35 | 3.29E-03 |
| <i>AQP10</i>      | ENSG00000143595 | -3.37 | 4.00E-02 |
| <i>MFSD4A</i>     | ENSG00000174514 | -3.37 | 2.01E-03 |
| <i>BMPR1B</i>     | ENSG00000138696 | -3.37 | 4.00E-02 |
| <i>LMX1B</i>      | ENSG00000136944 | -3.37 | 4.00E-02 |
| <i>NKX2-2</i>     | ENSG00000125820 | -3.37 | 9.36E-03 |
| <i>PCDH19</i>     | ENSG00000165194 | -3.37 | 1.59E-04 |
| <i>MAPK4</i>      | ENSG00000141639 | -3.39 | 6.49E-03 |
| <i>RBP4</i>       | ENSG00000138207 | -3.41 | 3.38E-03 |
| <i>CELF5</i>      | ENSG00000161082 | -3.43 | 8.40E-03 |
| <i>BEX1</i>       | ENSG00000133169 | -3.43 | 3.27E-04 |
| <i>AL606970.1</i> | ENSG00000224417 | -3.44 | 4.00E-02 |
| <i>PIRT</i>       | ENSG00000233670 | -3.44 | 1.80E-04 |

|                   |                 |       |          |
|-------------------|-----------------|-------|----------|
| <i>DHRS2</i>      | ENSG00000100867 | -3.45 | 6.79E-03 |
| <i>CYS1</i>       | ENSG00000205795 | -3.46 | 3.31E-04 |
| <i>SCG3</i>       | ENSG00000104112 | -3.46 | 2.80E-05 |
| <i>CLIC6</i>      | ENSG00000159212 | -3.46 | 6.16E-03 |
| <i>GPR119</i>     | ENSG00000147262 | -3.47 | 5.00E-02 |
| <i>PTGER3</i>     | ENSG00000050628 | -3.48 | 5.00E-02 |
| <i>SFRP5</i>      | ENSG00000120057 | -3.49 | 2.75E-03 |
| <i>SLC7A9</i>     | ENSG00000021488 | -3.49 | 4.00E-02 |
| <i>AK5</i>        | ENSG00000154027 | -3.51 | 6.85E-06 |
| <i>CSMD3</i>      | ENSG00000164796 | -3.51 | 2.62E-03 |
| <i>NECAB2</i>     | ENSG00000103154 | -3.51 | 2.88E-03 |
| <i>AL161658.1</i> | ENSG00000280229 | -3.51 | 2.00E-02 |
| <i>HLF</i>        | ENSG00000108924 | -3.53 | 1.21E-05 |
| <i>SPOCK3</i>     | ENSG00000196104 | -3.55 | 5.00E-02 |
| <i>SEMA3D</i>     | ENSG00000153993 | -3.55 | 8.99E-06 |
| <i>ADAMTS13</i>   | ENSG00000160323 | -3.57 | 1.56E-07 |
| <i>ELAVL4</i>     | ENSG00000162374 | -3.58 | 4.61E-04 |
| <i>ERO1B</i>      | ENSG00000086619 | -3.58 | 1.16E-10 |
| <i>MIR7-3HG</i>   | ENSG00000176840 | -3.58 | 6.77E-03 |
| <i>AATK</i>       | ENSG00000181409 | -3.59 | 2.71E-05 |
| <i>SIGLEC11</i>   | ENSG00000161640 | -3.59 | 5.00E-02 |
| <i>FAM163A</i>    | ENSG00000143340 | -3.60 | 2.00E-02 |
| <i>SLC6A4</i>     | ENSG00000108576 | -3.60 | 4.01E-04 |
| <i>GRIA2</i>      | ENSG00000120251 | -3.61 | 2.10E-04 |
| <i>NRIP3</i>      | ENSG00000175352 | -3.61 | 1.00E-02 |
| <i>AC023794.5</i> | ENSG00000260470 | -3.61 | 2.07E-03 |
| <i>LINC02446</i>  | ENSG00000256039 | -3.64 | 4.00E-03 |
| <i>MYO18B</i>     | ENSG00000133454 | -3.64 | 3.00E-02 |
| <i>NUDT10</i>     | ENSG00000122824 | -3.64 | 4.00E-02 |
| <i>DIRAS3</i>     | ENSG00000162595 | -3.66 | 9.86E-04 |
| <i>AC093642.2</i> | ENSG00000280119 | -3.66 | 3.23E-03 |
| <i>FGF9</i>       | ENSG00000102678 | -3.66 | 3.49E-05 |
| <i>ARX</i>        | ENSG00000004848 | -3.66 | 3.79E-04 |
| <i>GRIA1</i>      | ENSG00000155511 | -3.67 | 7.04E-03 |
| <i>CPLX2</i>      | ENSG00000145920 | -3.67 | 1.66E-04 |
| <i>SYT7</i>       | ENSG00000011347 | -3.68 | 2.28E-05 |
| <i>INSM1</i>      | ENSG00000173404 | -3.68 | 5.69E-04 |
| <i>PCSK1N</i>     | ENSG00000102109 | -3.68 | 4.71E-04 |
| <i>MARCH4</i>     | ENSG00000144583 | -3.69 | 2.44E-03 |
| <i>SNAP25</i>     | ENSG00000132639 | -3.69 | 4.84E-05 |
| <i>KCTD16</i>     | ENSG00000183775 | -3.70 | 3.00E-02 |
| <i>SCG5</i>       | ENSG00000166922 | -3.70 | 3.64E-04 |
| <i>CES1</i>       | ENSG00000198848 | -3.70 | 1.75E-04 |
| <i>CFAP65</i>     | ENSG00000181378 | -3.72 | 1.73E-03 |



|                   |                 |       |          |
|-------------------|-----------------|-------|----------|
| <i>RNF157-AS1</i> | ENSG00000267128 | -3.73 | 2.00E-02 |
| <i>PLCXD3</i>     | ENSG00000182836 | -3.74 | 3.80E-06 |
| <i>VSTM2A-OT1</i> | ENSG00000224223 | -3.74 | 5.98E-03 |
| <i>IL33</i>       | ENSG00000137033 | -3.75 | 7.45E-13 |
| <i>AC006030.1</i> | ENSG00000264324 | -3.77 | 4.00E-02 |
| <i>AC105277.1</i> | ENSG00000232453 | -3.79 | 4.78E-05 |
| <i>TMEM27</i>     | ENSG00000147003 | -3.80 | 9.81E-06 |
| <i>TMEM190</i>    | ENSG00000160472 | -3.81 | 4.00E-02 |
| <i>PRPH</i>       | ENSG00000135406 | -3.82 | 8.57E-04 |
| <i>NDST4</i>      | ENSG00000138653 | -3.83 | 2.07E-05 |
| <i>AC116407.1</i> | ENSG00000214708 | -3.83 | 3.00E-02 |
| <i>WSCD2</i>      | ENSG00000075035 | -3.88 | 1.18E-06 |
| <i>ALDOB</i>      | ENSG00000136872 | -3.89 | 9.87E-03 |
| <i>FGF20</i>      | ENSG00000078579 | -3.90 | 2.00E-02 |
| <i>CX3CR1</i>     | ENSG00000168329 | -3.92 | 8.16E-04 |
| <i>RALYL</i>      | ENSG00000184672 | -3.94 | 9.09E-03 |
| <i>TDRD1</i>      | ENSG00000095627 | -3.95 | 7.68E-03 |
| <i>APLP1</i>      | ENSG00000105290 | -3.95 | 6.71E-03 |
| <i>GREM2</i>      | ENSG00000180875 | -3.96 | 7.75E-05 |
| <i>RGS7</i>       | ENSG00000182901 | -3.96 | 1.31E-04 |
| <i>SLC6A19</i>    | ENSG00000174358 | -3.96 | 1.09E-03 |
| <i>FFAR1</i>      | ENSG00000126266 | -3.96 | 3.53E-03 |
| <i>DIO3OS</i>     | ENSG00000258498 | -3.97 | 1.00E-02 |
| <i>SYT4</i>       | ENSG00000132872 | -3.99 | 2.32E-05 |
| <i>AC123912.1</i> | ENSG00000268081 | -3.99 | 3.00E-02 |
| <i>AL032819.2</i> | ENSG00000279930 | -4.01 | 1.00E-02 |
| <i>PRSS35</i>     | ENSG00000146250 | -4.05 | 3.89E-03 |
| <i>MYOZ1</i>      | ENSG00000177791 | -4.07 | 4.00E-02 |
| <i>PRLHR</i>      | ENSG00000119973 | -4.07 | 1.53E-03 |
| <i>CLEC9A</i>     | ENSG00000197992 | -4.09 | 1.00E-02 |
| <i>CARTPT</i>     | ENSG00000164326 | -4.11 | 1.04E-03 |
| <i>PCDHB1</i>     | ENSG00000171815 | -4.15 | 9.78E-03 |
| <i>CADM2</i>      | ENSG00000175161 | -4.16 | 2.30E-03 |
| <i>NSG2</i>       | ENSG00000170091 | -4.20 | 1.16E-04 |
| <i>FLG2</i>       | ENSG00000143520 | -4.23 | 9.32E-06 |
| <i>KRT40</i>      | ENSG00000204889 | -4.29 | 2.41E-03 |
| <i>MRO</i>        | ENSG00000134042 | -4.29 | 1.72E-08 |
| <i>TAGLN3</i>     | ENSG00000144834 | -4.35 | 4.61E-04 |
| <i>DIRAS2</i>     | ENSG00000165023 | -4.38 | 6.30E-05 |
| <i>AL032819.3</i> | ENSG00000284395 | -4.42 | 8.52E-03 |
| <i>C8orf48</i>    | ENSG00000164743 | -4.43 | 2.10E-06 |
| <i>C1orf127</i>   | ENSG00000175262 | -4.44 | 2.32E-04 |
| <i>CALY</i>       | ENSG00000130643 | -4.45 | 7.00E-05 |
| <i>NKX6-1</i>     | ENSG00000163623 | -4.47 | 1.46E-03 |

|                   |                 |       |          |
|-------------------|-----------------|-------|----------|
| <i>FAM159B</i>    | ENSG00000145642 | -4.47 | 3.16E-03 |
| <i>NRAP</i>       | ENSG00000197893 | -4.48 | 8.07E-05 |
| <i>PTPRN</i>      | ENSG00000054356 | -4.49 | 5.16E-07 |
| <i>PCDHB8</i>     | ENSG00000120322 | -4.49 | 2.00E-02 |
| <i>SLC34A2</i>    | ENSG00000157765 | -4.51 | 6.42E-04 |
| <i>SLC26A7</i>    | ENSG00000147606 | -4.53 | 7.63E-08 |
| <i>SCGN</i>       | ENSG00000079689 | -4.54 | 1.61E-06 |
| <i>VTN</i>        | ENSG00000109072 | -4.55 | 3.60E-05 |
| <i>SRPX</i>       | ENSG00000101955 | -4.56 | 1.85E-08 |
| <i>HCN1</i>       | ENSG00000164588 | -4.57 | 6.55E-03 |
| <i>TMEM132B</i>   | ENSG00000139364 | -4.59 | 1.02E-07 |
| <i>PIFO</i>       | ENSG00000173947 | -4.65 | 2.00E-02 |
| <i>LINC01933</i>  | ENSG00000254226 | -4.66 | 9.05E-04 |
| <i>C2orf40</i>    | ENSG00000119147 | -4.67 | 1.38E-03 |
| <i>AC008736.1</i> | ENSG00000267475 | -4.67 | 3.00E-02 |
| <i>CDH2</i>       | ENSG00000170558 | -4.72 | 3.00E-02 |
| <i>TMEM196</i>    | ENSG00000173452 | -4.74 | 1.88E-04 |
| <i>AC091551.1</i> | ENSG00000267699 | -4.78 | 3.85E-03 |
| <i>VSTM2A</i>     | ENSG00000170419 | -4.79 | 3.21E-08 |
| <i>TMEM132C</i>   | ENSG00000181234 | -4.80 | 2.58E-04 |
| <i>NEUROG3</i>    | ENSG00000122859 | -4.81 | 2.00E-02 |
| <i>AC069228.1</i> | ENSG00000258162 | -4.81 | 2.00E-02 |
| <i>FABP3</i>      | ENSG00000121769 | -4.86 | 3.91E-03 |
| <i>KCNK16</i>     | ENSG00000095981 | -4.94 | 5.41E-05 |
| <i>MT1G</i>       | ENSG00000125144 | -4.94 | 2.94E-03 |
| <i>AC020656.1</i> | ENSG00000257764 | -5.00 | 2.00E-02 |
| <i>GABRG2</i>     | ENSG00000113327 | -5.03 | 1.66E-04 |
| <i>PCP4L1</i>     | ENSG00000248485 | -5.07 | 1.00E-02 |
| <i>AC104985.1</i> | ENSG00000267746 | -5.09 | 4.00E-02 |
| <i>UCN3</i>       | ENSG00000178473 | -5.14 | 6.72E-05 |
| <i>OLFM3</i>      | ENSG00000118733 | -5.16 | 2.00E-02 |
| <i>NEUROD1</i>    | ENSG00000162992 | -5.17 | 6.09E-06 |
| <i>OTOP3</i>      | ENSG00000182938 | -5.18 | 8.38E-04 |
| <i>SLC17A8</i>    | ENSG00000179520 | -5.25 | 3.76E-03 |
| <i>AGMO</i>       | ENSG00000187546 | -5.32 | 5.20E-03 |
| <i>MUC15</i>      | ENSG00000169550 | -5.33 | 1.00E-02 |
| <i>LRFN2</i>      | ENSG00000156564 | -5.40 | 2.00E-02 |
| <i>RIPPLY2</i>    | ENSG00000203877 | -5.40 | 1.00E-02 |
| <i>CARNS1</i>     | ENSG00000172508 | -5.41 | 3.21E-07 |
| <i>C10orf67</i>   | ENSG00000179133 | -5.42 | 1.00E-02 |
| <i>LINC01902</i>  | ENSG00000283503 | -5.45 | 3.36E-03 |
| <i>RIMS4</i>      | ENSG00000101098 | -5.46 | 2.94E-03 |
| <i>LINC01594</i>  | ENSG00000225328 | -5.51 | 4.73E-03 |
| <i>HTR1F</i>      | ENSG00000179097 | -5.51 | 3.16E-03 |

|                    |                 |       |          |
|--------------------|-----------------|-------|----------|
| <i>TF</i>          | ENSG00000091513 | -5.52 | 7.92E-03 |
| <i>NTRK3</i>       | ENSG00000140538 | -5.53 | 3.63E-06 |
| <i>MT1H</i>        | ENSG00000205358 | -5.55 | 3.00E-02 |
| <i>KLHL1</i>       | ENSG00000150361 | -5.57 | 3.41E-05 |
| <i>GS1-594A7.3</i> | ENSG00000225833 | -5.62 | 2.00E-02 |
| <i>SLITRK5</i>     | ENSG00000165300 | -5.67 | 4.76E-08 |
| <i>KLHDC8A</i>     | ENSG00000162873 | -5.72 | 2.30E-03 |
| <i>OTC</i>         | ENSG00000036473 | -5.76 | 1.35E-04 |
| <i>TACR3</i>       | ENSG00000169836 | -5.79 | 1.00E-02 |
| <i>TRIM63</i>      | ENSG00000158022 | -5.80 | 3.00E-02 |
| <i>CYP3A4</i>      | ENSG00000160868 | -5.80 | 5.00E-02 |
| <i>SH3GL2</i>      | ENSG00000107295 | -5.82 | 3.02E-04 |
| <i>TM4SF4</i>      | ENSG00000169903 | -5.87 | 2.64E-07 |
| <i>RMST_9</i>      | ENSG00000276398 | -5.87 | 1.29E-04 |
| <i>AL137793.1</i>  | ENSG00000236975 | -5.92 | 3.00E-02 |
| <i>MEP1B</i>       | ENSG00000141434 | -5.92 | 2.00E-02 |
| <i>AC008268.1</i>  | ENSG00000235584 | -5.93 | 2.00E-02 |
| <i>IGFALS</i>      | ENSG00000099769 | -5.95 | 7.00E-05 |
| <i>NMUR2</i>       | ENSG00000132911 | -6.08 | 5.13E-06 |
| <i>GABRA1</i>      | ENSG00000022355 | -6.27 | 2.31E-06 |
| <i>LY6H</i>        | ENSG00000176956 | -6.33 | 7.93E-09 |
| <i>DEFB1</i>       | ENSG00000164825 | -6.41 | 1.72E-06 |
| <i>FRMPD4</i>      | ENSG00000169933 | -6.42 | 3.00E-02 |
| <i>NPW</i>         | ENSG00000183971 | -6.50 | 1.33E-05 |
| <i>AP003071.5</i>  | ENSG00000284713 | -6.57 | 1.32E-03 |
| <i>SST</i>         | ENSG00000157005 | -6.60 | 2.67E-07 |
| <i>LINC01370</i>   | ENSG00000237767 | -6.66 | 3.90E-03 |
| <i>ELFN1-AS1</i>   | ENSG00000236081 | -6.79 | 4.00E-02 |
| <i>TAC1</i>        | ENSG00000006128 | -6.81 | 5.00E-05 |
| <i>HOXC5</i>       | ENSG00000172789 | -6.99 | 7.78E-03 |
| <i>ATP4A</i>       | ENSG00000105675 | -7.16 | 2.00E-02 |
| <i>SLITRK3</i>     | ENSG00000121871 | -7.54 | 5.00E-02 |
| <i>RBP2</i>        | ENSG00000114113 | -7.56 | 3.00E-02 |
| <i>ZNF492</i>      | ENSG00000229676 | -7.59 | 5.06E-06 |
| <i>C5orf17</i>     | ENSG00000248874 | -7.68 | 3.18E-03 |
| <i>CHST9</i>       | ENSG00000154080 | -7.68 | 2.11E-06 |
| <i>MTP</i>         | ENSG00000138823 | -7.78 | 9.65E-04 |
| <i>AC005944.1</i>  | ENSG00000267469 | -7.88 | 3.00E-02 |
| <i>GLDN</i>        | ENSG00000186417 | -7.93 | 1.53E-09 |
| <i>LCT</i>         | ENSG00000115850 | -8.04 | 2.65E-03 |
| <i>AF131216.3</i>  | ENSG00000255020 | -8.07 | 5.00E-02 |
| <i>APOB</i>        | ENSG00000084674 | -8.31 | 2.00E-02 |
| <i>F11</i>         | ENSG00000088926 | -8.59 | 2.00E-02 |
| <i>NTS</i>         | ENSG00000133636 | -8.59 | 1.34E-03 |

|                   |                 |         |          |
|-------------------|-----------------|---------|----------|
| <i>MDGA2</i>      | ENSG00000139915 | -8.77   | 1.18E-06 |
| <i>MRPL23-AS1</i> | ENSG00000226416 | -9.09   | 5.67E-03 |
| <i>IGHD</i>       | ENSG00000211898 | -9.11   | 1.54E-04 |
| <i>AC093772.1</i> | ENSG00000248491 | -9.19   | 3.28E-03 |
| <i>APOC3</i>      | ENSG00000110245 | -9.21   | 3.00E-02 |
| <i>MS4A10</i>     | ENSG00000172689 | -9.28   | 5.00E-02 |
| <i>MATR3_2</i>    | ENSG00000015479 | -9.49   | 4.00E-02 |
| <i>FSTL5</i>      | ENSG00000168843 | -9.56   | 2.00E-02 |
| <i>BMP3</i>       | ENSG00000152785 | -9.80   | 9.83E-09 |
| <i>MUM1L1</i>     | ENSG00000157502 | -10.37  | 2.22E-12 |
| <i>TMPRSS15</i>   | ENSG00000154646 | -10.46  | 4.00E-02 |
| <i>SLC5A7</i>     | ENSG00000115665 | -10.47  | 5.86E-11 |
| <i>AC126544.2</i> | ENSG00000280022 | -10.63  | 4.48E-03 |
| <i>NPY</i>        | ENSG00000122585 | -10.91  | 7.85E-05 |
| <i>ALPI</i>       | ENSG00000163295 | -11.12  | 2.00E-02 |
| <i>FGG</i>        | ENSG00000171557 | -11.13  | 2.00E-02 |
| <i>NECAB1</i>     | ENSG00000123119 | -11.35  | 1.00E-15 |
| <i>CNTFR</i>      | ENSG00000122756 | -11.57  | 2.59E-07 |
| <i>CYP4F22</i>    | ENSG00000171954 | -11.66  | 1.17E-06 |
| <i>DDIT4-AS1</i>  | ENSG00000269926 | -11.82  | 2.00E-02 |
| <i>SULT1E1</i>    | ENSG00000109193 | -12.06  | 1.17E-03 |
| <i>ALB</i>        | ENSG00000163631 | -12.25  | 1.59E-04 |
| <i>GSTA3</i>      | ENSG00000174156 | -12.57  | 4.17E-04 |
| <i>AL512638.2</i> | ENSG00000228035 | -13.39  | 5.00E-02 |
| <i>APOA4</i>      | ENSG00000110244 | -13.53  | 3.00E-02 |
| <i>COL2A1</i>     | ENSG00000139219 | -13.59  | 4.66E-05 |
| <i>S100G</i>      | ENSG00000169906 | -13.74  | 1.00E-02 |
| <i>APOA1</i>      | ENSG00000118137 | -14.50  | 5.20E-04 |
| <i>CYP1A1</i>     | ENSG00000140465 | -14.54  | 2.45E-03 |
| <i>SULT2A1</i>    | ENSG00000105398 | -15.58  | 1.10E-05 |
| <i>UGT2A3</i>     | ENSG00000135220 | -24.63  | 1.00E-15 |
| <i>MCHR2</i>      | ENSG00000152034 | -30.37  | 8.32E-04 |
| <i>TBC1D3K</i>    | ENSG00000273513 | -31.73  | 5.00E-02 |
| <i>AC073174.1</i> | ENSG00000227121 | -34.74  | 3.00E-02 |
| <i>TBC1D3G</i>    | ENSG00000260287 | -40.92  | 3.00E-02 |
| <i>AC087190.4</i> | ENSG00000263244 | -45.72  | 3.00E-02 |
| <i>AC009133.6</i> | ENSG00000280893 | -47.30  | 1.00E-02 |
| <i>PGA5</i>       | ENSG00000256713 | -51.71  | 7.66E-05 |
| <i>SFT2D3</i>     | ENSG00000173349 | -54.98  | 1.00E-02 |
| <i>CHIA</i>       | ENSG00000134216 | -389.59 | 7.55E-11 |

---

**Consortium of Eosinophilic Gastrointestinal Disease Researchers (CEGIR) questionnaires**

- Registry for Eosinophilic Gastrointestinal Diseases (REGID) Provider Questionnaire
- CEGIR Outcomes Measures in Eosinophilic Gastrointestinal disorders Across the ages (OMEGA) Patient Intake Questionnaire

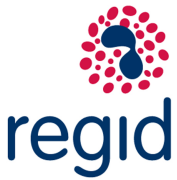

Initials:

Subject ID:

v0.11 09/26/2012

**Office Use Only**

Visit Date:  /  /   
 Month Day Year

Visit Type:  Initial Visit  Follow-Up Clinic  Follow-Up Endoscopy  Chart Review Only

**Eosinophilic Gastrointestinal Disorder (EGID) Diagnosis**

If the patient has been given an EGID diagnosis, please answer the questions below.

| Diagnosis                                                                                                                                                                                                                                                                                                                                                                                                                                                                                                                                                                                                                                                                                                                                                                                                                                                             | Diagnosed?                                                                                       | Age diagnosed                                                                                                  | Treatment (choose all that apply)                                                                                                                                                                                                                                                                                             |
|-----------------------------------------------------------------------------------------------------------------------------------------------------------------------------------------------------------------------------------------------------------------------------------------------------------------------------------------------------------------------------------------------------------------------------------------------------------------------------------------------------------------------------------------------------------------------------------------------------------------------------------------------------------------------------------------------------------------------------------------------------------------------------------------------------------------------------------------------------------------------|--------------------------------------------------------------------------------------------------|----------------------------------------------------------------------------------------------------------------|-------------------------------------------------------------------------------------------------------------------------------------------------------------------------------------------------------------------------------------------------------------------------------------------------------------------------------|
| <b>Eosinophilic Esophagitis (EoE)</b><br>Patient treated for 8 or more weeks with a proton pump inhibitor (any dose) before diagnosed with EoE? $\geq 15$<br><input type="checkbox"/> Yes <input type="checkbox"/> No <input type="checkbox"/> Not sure<br>If Yes, indicate the name of PPI and the dosage.<br>Name: _____<br>Dosage: _____<br>Patient treated for 8 or more weeks with <u>high dose</u> * proton pump inhibitor before diagnosed with EoE?<br><input type="checkbox"/> Yes <input type="checkbox"/> No <input type="checkbox"/> Not sure<br><small>* 20-40 mg daily in adults (depends on patient and chosen PPI) and 1 mg/kg twice daily (for maximal dosing use in children)</small><br>Normal pH or impedance probe test before diagnosed with EoE?<br><input type="checkbox"/> Yes <input type="checkbox"/> No <input type="checkbox"/> Not sure | <input type="checkbox"/> Yes<br><input type="checkbox"/> No<br><input type="checkbox"/> Not sure | <input type="text"/> <input type="text"/><br><input type="checkbox"/> Months<br><input type="checkbox"/> Years | <input type="checkbox"/> Swallowed Topical Steroids<br><input type="checkbox"/> Oral Systemic Steroids<br><input type="checkbox"/> Elimination Diet<br><input type="checkbox"/> Empiric Elimination Diet<br><input type="checkbox"/> Elemental Diet<br><input type="checkbox"/> Other _____                                   |
| <b>Eosinophilic Gastritis</b>                                                                                                                                                                                                                                                                                                                                                                                                                                                                                                                                                                                                                                                                                                                                                                                                                                         | <input type="checkbox"/> Yes<br><input type="checkbox"/> No<br><input type="checkbox"/> Not sure | <input type="text"/> <input type="text"/><br><input type="checkbox"/> Months<br><input type="checkbox"/> Years | <input type="checkbox"/> Swallowed Topical Steroids<br><input type="checkbox"/> Oral Systemic Steroids<br><input type="checkbox"/> Elimination Diet<br><input type="checkbox"/> Empiric Elimination Diet<br><input type="checkbox"/> Elemental Diet<br><input type="checkbox"/> Other _____                                   |
| <b>Eosinophilic Colitis</b>                                                                                                                                                                                                                                                                                                                                                                                                                                                                                                                                                                                                                                                                                                                                                                                                                                           | <input type="checkbox"/> Yes<br><input type="checkbox"/> No<br><input type="checkbox"/> Not sure | <input type="text"/> <input type="text"/><br><input type="checkbox"/> Months<br><input type="checkbox"/> Years | <input type="checkbox"/> Swallowed Topical Steroids<br><input type="checkbox"/> Oral Systemic Steroids<br><input type="checkbox"/> 5-ASA<br><input type="checkbox"/> Elimination Diet<br><input type="checkbox"/> Empiric Elimination Diet<br><input type="checkbox"/> Elemental Diet<br><input type="checkbox"/> Other _____ |



Initials:   
 Subject ID:

EoE diagnosis by a physician:

Age at Diagnosis:  years  months  
 Age at First Endoscopy:  years  months  
 Age at First Symptoms:  years  months

Please indicate which therapy(ies) has been used to treat the patient's EGID. Also indicate which therapy(ies) has been effective based on symptoms and / or pathology.

None. No therapy has been used to treat the patient's EGID.

If None, please skip to the next section.

|                                                                                      | Used                     |                          |                          | Effective for Sx         |                          |                          | Effective for Path       |                          |                          |
|--------------------------------------------------------------------------------------|--------------------------|--------------------------|--------------------------|--------------------------|--------------------------|--------------------------|--------------------------|--------------------------|--------------------------|
|                                                                                      | Yes                      | No                       | Not sure                 | Yes                      | No                       | Not sure                 | Yes                      | No                       | Not sure                 |
| Swallowed topical steroids (i.e. fluticasone, budesonide)                            | <input type="checkbox"/> |
| Oral systemic steroids (i.e. Prednisone®)                                            | <input type="checkbox"/> |
| Elimination Diet (removing food(s) the patient is allergic to)                       | <input type="checkbox"/> |
| Empiric Elimination Diet (avoiding food(s) that the doctor has recommended to avoid) | <input type="checkbox"/> |
| Elemental Diet (taking elemental formula and up to one food)                         | <input type="checkbox"/> |
| Swallowed topical steroids AND Diet elimination                                      | <input type="checkbox"/> |
| Esophageal Dilation                                                                  | <input type="checkbox"/> |
| Anti-IL5                                                                             | <input type="checkbox"/> |
| Anti-IL13                                                                            | <input type="checkbox"/> |
| Leukotriene Modifier (e.g. Monteleukast)                                             | <input type="checkbox"/> |
| 5-ASA                                                                                | <input type="checkbox"/> |
| Other:                                                                               | <input type="checkbox"/> |

**Physician Global Assessment**

If you consider the patient's most recent clinical status, how active is the EoE?

Quiescent       Mild       Moderate       Severe

If you consider the patient's histologic status, how active is the EoE?

Quiescent       Mild       Moderate       Severe

If you consider the patient's overall status, how active is the EoE?

Quiescent       Mild       Moderate       Severe

Please rate the patient's change in height on the growth chart since their last visit.

No change       Up       Down

Please rate the patient's change in weight on the growth chart since their last visit.

No change       Up       Down

Height:  .  cm

Weight:  .  Kg

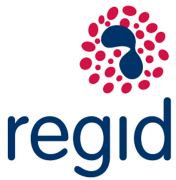

Initials: [ ]
Subject ID: [ ]
v0.11 09/26/2012

Surgical History

Has the patient had food impactions that required urgent endoscopic removal? [ ] Yes [ ] No [ ] Not sure

If Yes, how many times? [ ][ ]

If Yes, please specify the date for the last three (3) times this occurred.

[ ][ ] / [ ][ ] / [ ][ ][ ][ ]
[ ][ ] / [ ][ ] / [ ][ ][ ][ ]
[ ][ ] / [ ][ ] / [ ][ ][ ][ ]

Has the patient had dilation (stretching) of the esophagus? [ ] Yes [ ] No [ ] Not sure

If Yes, how many times? [ ][ ]

If Yes, please specify the date for the last three (3) times this occurred.

[ ][ ] / [ ][ ] / [ ][ ][ ][ ]
[ ][ ] / [ ][ ] / [ ][ ][ ][ ]
[ ][ ] / [ ][ ] / [ ][ ][ ][ ]

Has the patient had an esophageal perforation? [ ] Yes [ ] No [ ] Not sure

If Yes, how many times? [ ][ ]

If Yes, please specify the date for the last three (3) times this occurred.

[ ][ ] / [ ][ ] / [ ][ ][ ][ ]
[ ][ ] / [ ][ ] / [ ][ ][ ][ ]
[ ][ ] / [ ][ ] / [ ][ ][ ][ ]

Current Therapy(ies)

Which therapy(ies) is currently being used to treat the patient's EGID? (choose all that apply)

- [ ] Swallowed topical steroids (i.e. fluticasone, budesonide)
[ ] Oral systemic steroids (i.e. Prednisone®)
[ ] Proton pump inhibitor (i.e. esomeprazole, lansoprazole, pantoprazole, omeprazole)
[ ] Elimination Diet (removing food(s) the patient is allergic to)
[ ] Empiric Elimination Diet (avoiding food(s) that the doctor has recommended to avoid)
[ ] Elemental Diet (taking elemental formula and up to one food)
[ ] Esophageal Dilation
[ ] Anti-IL5
[ ] Anti-IL13
[ ] Leukotriene Modifier (e.g. Monteleukast)
[ ] 5-ASA
[ ] Other

If Other, please specify:





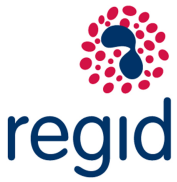

|             |                      |
|-------------|----------------------|
| Initials:   | <input type="text"/> |
| Subject ID: | <input type="text"/> |

v0.11 09/26/2012

**What is the patient's current diet for the EGID? (choose all that apply)**

- |                                                                            |                                                                                                                   |                                                                                                                    |
|----------------------------------------------------------------------------|-------------------------------------------------------------------------------------------------------------------|--------------------------------------------------------------------------------------------------------------------|
| <input type="checkbox"/> No Restrictions: Patient eats whatever s/he wants | <input type="checkbox"/> Elimination Diet: Patient avoids food (s) s/he is allergic to by allergy testing results | <input type="checkbox"/> Empiric Elimination Diet: Patient avoids food(s) that the doctor has recommended to avoid |
| <input type="checkbox"/> Elemental Formula (up to one food)                | <input type="checkbox"/> Elemental Formula and Food                                                               | <input type="checkbox"/> Elemental Formula and Food Trial                                                          |
| <input type="checkbox"/> Non-elemental Formula                             | <input type="checkbox"/> Non-elemental Formula and Food                                                           | <input type="checkbox"/> TPN                                                                                       |
| <input type="checkbox"/> Food Trial                                        | <input type="checkbox"/> Other                                                                                    |                                                                                                                    |

**If Other, please specify:** \_\_\_\_\_

|                   |  |
|-------------------|--|
| Initials:         |  |
| Local Subject ID: |  |

v0.1 20March2016

**Only** **Office Use**

Visit Date:   /   /      
 Month Day Year

Visit Type:  Initial Visit  Annual Follow Up

RDCRN Participant ID:

**Person Completing this Form**

What is your relationship to the patient?

Self  Parent  Legal Guardian  Other

If Other, please specify: \_\_\_\_\_

*Note that throughout this document, references to "patient" stand for the research participant. "Patient" refers to you if you are the research participant or your child / ward if s/he is the research participant and you are completing the form because s/he is under 18 years of age or otherwise unable to complete the form.*

Is the patient a product of a multiple birth (e.g. twin, triplet)?

Yes, Identical  Yes, Not Identical  No

Initials:

Local  
Subject ID:

|  |  |
|--|--|
|  |  |
|  |  |

v0.1 20March2016

## Patient History

Please complete the following to inform us of the patient's past medical history.

No Change since last visit

| Past Medical History (diagnosed by a physician)                                                                                                                                                                                                                                                                                                                                                                                                                                                                                                                                                                                                    |     |    |          |
|----------------------------------------------------------------------------------------------------------------------------------------------------------------------------------------------------------------------------------------------------------------------------------------------------------------------------------------------------------------------------------------------------------------------------------------------------------------------------------------------------------------------------------------------------------------------------------------------------------------------------------------------------|-----|----|----------|
| ALLERGY / IMMUNOLOGY                                                                                                                                                                                                                                                                                                                                                                                                                                                                                                                                                                                                                               | Yes | No | Not sure |
| <b>1. Allergic conjunctivitis</b> ( <i>itchy, watery eyes</i> ) or <b>Allergic rhinitis</b> ( <i>seasonal stuffy, runny nose or hayfever</i> )<br><b>Triggers (Check all that apply):</b> <input type="checkbox"/> Grass <input type="checkbox"/> Mold <input type="checkbox"/> Trees <input type="checkbox"/> Weeds<br><input type="checkbox"/> Cockroach <input type="checkbox"/> Dust mites <input type="checkbox"/> Cat <input type="checkbox"/> Dog                                                                                                                                                                                           |     |    |          |
| <b>2. Angioedema</b> ( <i>swelling of skin</i> )                                                                                                                                                                                                                                                                                                                                                                                                                                                                                                                                                                                                   |     |    |          |
| <b>3. Asthma</b> ( <i>breathing problem requiring the use of an inhaler / nebulizer at least once a year</i> )<br><b>Please check any that apply for the previous 12 months:</b> <input type="checkbox"/> Emergency Department visit<br><input type="checkbox"/> Steroid course <input type="checkbox"/> Daily asthma medication <input type="checkbox"/> daytime Albuterol use more than 2x a week <input type="checkbox"/> nighttime Albuterol use more than 2x a month<br><b>Triggers (Check all that apply):</b> <input type="checkbox"/> Upper Respiratory Infection <input type="checkbox"/> Weather Changes <input type="checkbox"/> Pollen |     |    |          |
| <b>4. Autoimmune disease</b> ( <i>Lupus, Diabetes Type I, Hashimoto's Thyroiditis, etc.</i> )                                                                                                                                                                                                                                                                                                                                                                                                                                                                                                                                                      |     |    |          |
| <b>5. Drug anaphylaxis</b> ( <i>severe, sudden reaction to drug</i> )                                                                                                                                                                                                                                                                                                                                                                                                                                                                                                                                                                              |     |    |          |
| <b>6. Eczema</b> ( <i>chronic dry, itchy skin rash</i> )                                                                                                                                                                                                                                                                                                                                                                                                                                                                                                                                                                                           |     |    |          |
| <b>7. Environmental allergies</b> ( <i>such as dust, pollen, grass, cats</i> )                                                                                                                                                                                                                                                                                                                                                                                                                                                                                                                                                                     |     |    |          |
| <b>8. Food allergy</b> ( <i>immediate rash, trouble breathing or feeling unwell after eating food; not limited to the esophagus</i> )                                                                                                                                                                                                                                                                                                                                                                                                                                                                                                              |     |    |          |
| <b>9. Hypereosinophilic syndrome</b> ( <i>excessive blood eosinophils &gt;= 6 months</i> )                                                                                                                                                                                                                                                                                                                                                                                                                                                                                                                                                         |     |    |          |
| <b>10. Immunodeficiency</b> ( <i>known immune problem causing recurrent infections</i> )                                                                                                                                                                                                                                                                                                                                                                                                                                                                                                                                                           |     |    |          |
| <b>11. Latex allergy</b> ( <i>emergent or prolonged reaction to latex such as rash, hives, or trouble breathing</i> )                                                                                                                                                                                                                                                                                                                                                                                                                                                                                                                              |     |    |          |
| <b>12. Oral allergy syndrome</b> ( <i>burning, tingling sensation, or rash around mouth following eating food</i> )                                                                                                                                                                                                                                                                                                                                                                                                                                                                                                                                |     |    |          |
| <b>13. Sinusitis</b> ( <i>infection of sinus with headache or pressure</i> )                                                                                                                                                                                                                                                                                                                                                                                                                                                                                                                                                                       |     |    |          |
| <b>14. Urticaria</b> ( <i>hives</i> )                                                                                                                                                                                                                                                                                                                                                                                                                                                                                                                                                                                                              |     |    |          |
| <b>15. Vocal cord dysfunction</b>                                                                                                                                                                                                                                                                                                                                                                                                                                                                                                                                                                                                                  |     |    |          |
| GASTROINTESTINAL                                                                                                                                                                                                                                                                                                                                                                                                                                                                                                                                                                                                                                   | Yes | No | Not sure |
| <b>16. Achalasia</b> ( <i>disease of the esophageal muscle</i> )                                                                                                                                                                                                                                                                                                                                                                                                                                                                                                                                                                                   |     |    |          |
| <b>17. Barrett's esophagus</b> ( <i>disease with an abnormal change in the cells of the esophagus that is pre-cancerous</i> )                                                                                                                                                                                                                                                                                                                                                                                                                                                                                                                      |     |    |          |
| <b>18. Celiac disease</b> ( <i>disease that damages the small intestine because of an immune reaction to gluten</i> )                                                                                                                                                                                                                                                                                                                                                                                                                                                                                                                              |     |    |          |
| <b>19. Esophageal cancer</b>                                                                                                                                                                                                                                                                                                                                                                                                                                                                                                                                                                                                                       |     |    |          |
| <b>20. Esophageal dilation</b> ( <i>dilate or stretch the esophagus</i> )                                                                                                                                                                                                                                                                                                                                                                                                                                                                                                                                                                          |     |    |          |
| <b>21. Esophageal perforation</b> ( <i>hole / tear in the esophagus either spontaneous or procedure related</i> )                                                                                                                                                                                                                                                                                                                                                                                                                                                                                                                                  |     |    |          |
| <b>22. Esophageal stricture</b> ( <i>narrowing / tightening of the esophagus on endoscopy or x-ray</i> )                                                                                                                                                                                                                                                                                                                                                                                                                                                                                                                                           |     |    |          |

|                   |  |
|-------------------|--|
| Initials:         |  |
| Local Subject ID: |  |

v0.1 20March2016

|                                                                                                                                      |  |  |  |
|--------------------------------------------------------------------------------------------------------------------------------------|--|--|--|
| 23. Failure to thrive (poor growth in childhood, smaller than the 5th percentile on doctor's growth chart)                           |  |  |  |
| 25. Food getting stuck in chest or throat (impaction) - self-cleared (not requiring a doctor)                                        |  |  |  |
| 26. Food getting stuck in chest or throat (impaction) - treated / removed by a physician                                             |  |  |  |
| 27. GERD (heartburn / reflux)                                                                                                        |  |  |  |
| 28. Inflammatory bowel disease (Crohns disease / Ulcerative colitis) (bowel disease <u>with</u> inflammation)                        |  |  |  |
| 29. Irritable Bowel Syndrome (bowel disorder characterized by abdominal pain and changes in bowel habits but <u>no</u> inflammation) |  |  |  |

| Past Medical History (diagnosed by a physician) - Continued                           |     |    |          |
|---------------------------------------------------------------------------------------|-----|----|----------|
| MISCELLANEOUS                                                                         | Yes | No | Not sure |
| 30. Anxiety                                                                           |     |    |          |
| 31. Arthritis / Joint pain                                                            |     |    |          |
| 32. Autism                                                                            |     |    |          |
| 33. Behavioral disorders (ADHD, OCD)                                                  |     |    |          |
| 34. Connective Tissue Disease (Marfan's syndrome, Ehlers-Danlos, Joint hypermobility) |     |    |          |
| 35. Depression                                                                        |     |    |          |
| 36. Developmental delay                                                               |     |    |          |
| 37. Mitochondrial disorder                                                            |     |    |          |
| 38. Prematurity (less than 37 weeks)                                                  |     |    |          |

## Surgical History

Please specify whether the patient has had any of the the following surgical procedures (**Not including endoscopies**).

- None. The patient hasn't had any surgical procedures (except endoscopies).  No Change since last visit

 If None, please go to the next question.

| Surgical History                          | Yes | No | Not sure |
|-------------------------------------------|-----|----|----------|
| 1. Adenoidectomy                          |     |    |          |
| 2. Sinus surgery                          |     |    |          |
| 3. Tonsillectomy                          |     |    |          |
| 4. Fundoplication (i.e. Nissen)           |     |    |          |
| 5. Gastrostomy tube                       |     |    |          |
| 6. Tracheoesophageal fistula (TEF) repair |     |    |          |
| 7. Tracheostomy                           |     |    |          |
| 8. Appendectomy                           |     |    |          |
| 9. Bronchoscopy                           |     |    |          |
| 10. Hernia Repair                         |     |    |          |
| 11. Ear tubes                             |     |    |          |
| 12. Other: _____                          |     |    |          |

## Foods

Is the patient currently avoiding / not eating certain food(s)?

- The patient has no restrictions and eats whatever s/he wants.  
 The patient is currently not eating any food(s) (elemental diet or TPN only).  
 The patient is currently taking an elemental diet and some food(s).  
 The patient is currently avoiding certain food(s).

 If the patient is not currently avoiding certain food(s), please go to the next question.

Please specify which food(s) the patient is currently avoiding / not eating. (choose all that apply)

- |                                |                                    |                                       |                                     |                                  |
|--------------------------------|------------------------------------|---------------------------------------|-------------------------------------|----------------------------------|
| <input type="checkbox"/> Corn  | <input type="checkbox"/> Fish      | <input type="checkbox"/> Apple        | <input type="checkbox"/> Beef       | <input type="checkbox"/> Chicken |
| <input type="checkbox"/> Egg   | <input type="checkbox"/> Shellfish | <input type="checkbox"/> Avocado      | <input type="checkbox"/> Broccoli   | <input type="checkbox"/> Pea     |
| <input type="checkbox"/> Milk  |                                    | <input type="checkbox"/> Banana       | <input type="checkbox"/> Cantaloupe | <input type="checkbox"/> Pork    |
| <input type="checkbox"/> Soy   | <input type="checkbox"/> Peanut    | <input type="checkbox"/> Barley       | <input type="checkbox"/> Carrot     | <input type="checkbox"/> Rice    |
| <input type="checkbox"/> Wheat | <input type="checkbox"/> Tree nuts | <input type="checkbox"/> Bean, String | <input type="checkbox"/> Celery     | <input type="checkbox"/> Turkey  |
| <input type="checkbox"/> Other |                                    |                                       |                                     |                                  |

If Other, please specify: \_\_\_\_\_

### Food Related Problems

Please complete the following to inform us of the patient's food allergy reactions.

None. The patient does not have any known food allergy reactions.  No change since last visit

|            | Never tried | Rash | Difficulty breathing | Vomiting | Difficulty swallowing | Diarrhea | Abdominal pain | Low Blood Pressure | If Other, specify. | RAST (IU/mL) | Skin prick (w/f mm) | Patch (0-4) |
|------------|-------------|------|----------------------|----------|-----------------------|----------|----------------|--------------------|--------------------|--------------|---------------------|-------------|
| Example    |             | x    |                      |          |                       |          | x              | x                  | Muscle pain.       | 1.54         | 10 / 20             | 2           |
| Milk       |             |      |                      |          |                       |          |                |                    |                    |              | /                   |             |
| Soy        |             |      |                      |          |                       |          |                |                    |                    |              | /                   |             |
| Egg        |             |      |                      |          |                       |          |                |                    |                    |              | /                   |             |
| Wheat      |             |      |                      |          |                       |          |                |                    |                    |              | /                   |             |
| Peanut     |             |      |                      |          |                       |          |                |                    |                    |              | /                   |             |
| Corn       |             |      |                      |          |                       |          |                |                    |                    |              | /                   |             |
| Shellfish  |             |      |                      |          |                       |          |                |                    |                    |              | /                   |             |
| Other fish |             |      |                      |          |                       |          |                |                    |                    |              | /                   |             |
| Beef       |             |      |                      |          |                       |          |                |                    |                    |              | /                   |             |
| Tree nuts* |             |      |                      |          |                       |          |                |                    |                    |              | /                   |             |
| Oat        |             |      |                      |          |                       |          |                |                    |                    |              | /                   |             |
| Barley     |             |      |                      |          |                       |          |                |                    |                    |              | /                   |             |
| Potato     |             |      |                      |          |                       |          |                |                    |                    |              | /                   |             |
| Peas       |             |      |                      |          |                       |          |                |                    |                    |              | /                   |             |
| Chicken    |             |      |                      |          |                       |          |                |                    |                    |              | /                   |             |
| Turkey     |             |      |                      |          |                       |          |                |                    |                    |              | /                   |             |
| Pork       |             |      |                      |          |                       |          |                |                    |                    |              | /                   |             |
| Rice       |             |      |                      |          |                       |          |                |                    |                    |              | /                   |             |
| Other:     |             |      |                      |          |                       |          |                |                    |                    |              | /                   |             |
| Other:     |             |      |                      |          |                       |          |                |                    |                    |              | /                   |             |

\* Tree nuts (Almond, walnut, hazelnut, brazil nut, pecans)

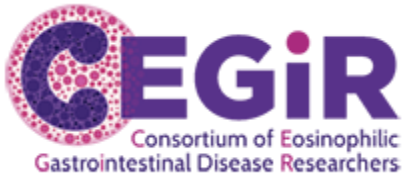

OMEGA  
Patient Intake Questionnaire  
6

Initials:

Local Subject ID:

v0.1 20March2016

**Environmental Allergies**

Please complete the following to inform us of the patient's environmental allergy reactions.

None. The patient does not have any known environmental allergy reactions.  No change since last visit

|                |             |                |
|----------------|-------------|----------------|
|                |             |                |
| <b>Example</b> | <b>1.54</b> | <b>10 / 20</b> |
| Tree           |             | /              |
| Grass          |             | /              |
| Ragweed        |             | /              |
| Cat            |             | /              |
| Dog            |             | /              |
| Dust mite      |             | /              |
| Weeds          |             | /              |
| Mold           |             | /              |
| Cockroach      |             | /              |
| Mice           |             | /              |

**Environmental History**

What locale does the patient live in?

City  Suburbs  Country  Not sure  Other

If Other, please specify: \_\_\_\_\_

What type of structure does the patient live in?

House  Apartment  Not sure  Other

If Other, please specify: \_\_\_\_\_

Indicate where the is mold in the patient's home. (choose all that apply)

Basement  Bathroom  Windows  None  Note sure  Other

If Other, please specify: \_\_\_\_\_

Please indicate which pets are currently living in the patient's home. (choose all that apply)

Cats  Dogs  None  Not sure  Other

If Other, please specify: \_\_\_\_\_

What pests have been in the patient's home. (choose all that apply)

Cockroaches  Mice  Rats  None  Not Sure  Other

If Other, please specify: \_\_\_\_\_





OMEGA  
Patient Intake Questionnaire  
7

|                   |  |
|-------------------|--|
| Initials:         |  |
| Local Subject ID: |  |

v0.1 20March2016

Does the patient have dust-proof allergy covers for the mattress and/or pillow?  Yes  No  Not sure

Does the patient have a prolonged history of smoking?  Yes  No  Not sure

Has the patient had prolonged exposure to smoke (family member, etc.)?  Yes  No  Not sure

**Family History**

Was the patient adopted?  Yes  No

Please indicate whether the patient was delivered by vaginal delivery or C-section.

Vaginal  C-section  Not sure

What was the age of the patient's mother at the time of birth? Years: \_\_\_\_\_  Not sure

What was the age of the patient's father at the time of birth? Years: \_\_\_\_\_  Not sure

What was the patient's birth weight?

Pounds: \_\_\_\_\_ Ounces: \_\_\_\_\_  Not sure

What was the patient's birth length?

Inches: \_\_\_\_\_  Not sure

Was the patient born more than 3 weeks before his/her due date? Yes  No  Not sure

At what week of gestation was he/she born?

37 or more weeks  32-36 weeks  
 Less than 32 weeks  Don't know

Did the patient take any antibiotics when he/she was a baby, less than one year of age?

Yes  No  Not sure

If Yes, what happened? \_\_\_\_\_

Were there any emergency room visits during the first 3 months of life?

Yes  No  Not sure

If Yes, what happened? \_\_\_\_\_

Did the patient spend any time in the neonatal intensive care unit (NICU) after he/she was born?

Yes  No  Not Sure

Were there any hospitalizations in the first year of life?

Yes  No  Not sure

If Yes, what happened? \_\_\_\_\_

Did the mother smoke at any time during the pregnancy the patient?

Yes  No  Not sure

When the patient was born was he/she fed any breastmilk?

Yes  No  Not sure

|                          |  |
|--------------------------|--|
| <b>Initials:</b>         |  |
| <b>Local Subject ID:</b> |  |

v0.1 20March2016

**⚠** If Yes and information is not available regarding the biological family history of the patient, please check unknown / unavailable history.

Please complete the following to inform us of the patient's family history (BIOLOGICAL relatives only).

| Biological Relatives                                      | Mother   | Father   | Maternal Grandma | Maternal Grandpa | Paternal Grandma | Paternal Grandpa | Patient's Sibling 1                                      | Patient's Sibling 2                                      | Patient's Sibling 3                                      | Patient's Sibling 4                                      | Patient's Child 1                                        | Patient's Child 2                                        | Patient's Child 3                                        | Patient's Child 4                                        |          |
|-----------------------------------------------------------|----------|----------|------------------|------------------|------------------|------------------|----------------------------------------------------------|----------------------------------------------------------|----------------------------------------------------------|----------------------------------------------------------|----------------------------------------------------------|----------------------------------------------------------|----------------------------------------------------------|----------------------------------------------------------|----------|
| Not applicable/ history unavailable                       |          |          |                  |                  |                  |                  |                                                          |                                                          |                                                          |                                                          |                                                          |                                                          |                                                          |                                                          |          |
| Date of Birth (mm/dd/yyyy)<br><i>example: 02/24/ 1974</i> | __/__/__ | __/__/__ |                  |                  |                  |                  | __/__/__                                                 | __/__/__                                                 | __/__/__                                                 | __/__/__                                                 | __/__/__                                                 | __/__/__                                                 | __/__/__                                                 | __/__/__                                                 | __/__/__ |
| Sex                                                       |          |          |                  |                  |                  |                  | <input type="checkbox"/> M<br><input type="checkbox"/> F |          |

**ALLERGY / IMMUNOLOGY**

|                                                |  |  |  |  |  |  |  |  |  |  |  |  |  |  |
|------------------------------------------------|--|--|--|--|--|--|--|--|--|--|--|--|--|--|
| Allergic rhinitis ( <i>hayfever</i> )          |  |  |  |  |  |  |  |  |  |  |  |  |  |  |
| Angioedema ( <i>tissue swelling disorder</i> ) |  |  |  |  |  |  |  |  |  |  |  |  |  |  |
| Asthma                                         |  |  |  |  |  |  |  |  |  |  |  |  |  |  |
| Eczema / Atopic dermatitis                     |  |  |  |  |  |  |  |  |  |  |  |  |  |  |
| Food allergy                                   |  |  |  |  |  |  |  |  |  |  |  |  |  |  |
| Hyper eosinophilic syndrome                    |  |  |  |  |  |  |  |  |  |  |  |  |  |  |
| Immunodeficiency                               |  |  |  |  |  |  |  |  |  |  |  |  |  |  |
| Oral Allergy Syndrome                          |  |  |  |  |  |  |  |  |  |  |  |  |  |  |
| Urticaria ( <i>recurrent hives</i> )           |  |  |  |  |  |  |  |  |  |  |  |  |  |  |

**GASTROINTESTINAL**

|                                                    |  |  |  |  |  |  |  |  |  |  |  |  |  |  |
|----------------------------------------------------|--|--|--|--|--|--|--|--|--|--|--|--|--|--|
| Achalasia                                          |  |  |  |  |  |  |  |  |  |  |  |  |  |  |
| Barrett's esophagus                                |  |  |  |  |  |  |  |  |  |  |  |  |  |  |
| Celiac disease                                     |  |  |  |  |  |  |  |  |  |  |  |  |  |  |
| Eosinophilic Esophagitis ( <i>EoE</i> )            |  |  |  |  |  |  |  |  |  |  |  |  |  |  |
| Eosinophilic GI disorder ( <i>other than EoE</i> ) |  |  |  |  |  |  |  |  |  |  |  |  |  |  |
| Esophageal cancer                                  |  |  |  |  |  |  |  |  |  |  |  |  |  |  |
| Esophageal dilation or stricture                   |  |  |  |  |  |  |  |  |  |  |  |  |  |  |
| Food impaction ( <i>getting stuck in throat</i> )  |  |  |  |  |  |  |  |  |  |  |  |  |  |  |
| Gastroesophageal reflux disease ( <i>GERD</i> )    |  |  |  |  |  |  |  |  |  |  |  |  |  |  |
| Inflammatory Bowel Disease ( <i>IBD</i> )          |  |  |  |  |  |  |  |  |  |  |  |  |  |  |
| Reflux surgery                                     |  |  |  |  |  |  |  |  |  |  |  |  |  |  |
| Stomach or duodenal ulcer                          |  |  |  |  |  |  |  |  |  |  |  |  |  |  |

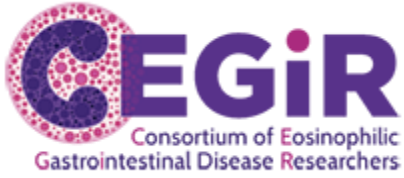

OMEGA  
Patient Intake Questionnaire  
9

|                   |  |
|-------------------|--|
| Initials:         |  |
| Local Subject ID: |  |

v0.1 20March2016

| Biological Relatives | Mother | Father | Maternal Grandma | Maternal Grandpa | Paternal Grandma | Paternal Grandpa | Patient's Sibling 1 | Patient's Sibling 2 | Patient's Sibling 3 | Patient's Sibling 4 | Patient's Child 1 | Patient's Child 2 | Patient's Child 3 | Patient's Child 4 |
|----------------------|--------|--------|------------------|------------------|------------------|------------------|---------------------|---------------------|---------------------|---------------------|-------------------|-------------------|-------------------|-------------------|
|----------------------|--------|--------|------------------|------------------|------------------|------------------|---------------------|---------------------|---------------------|---------------------|-------------------|-------------------|-------------------|-------------------|

*MISCELLANEOUS*

|                               |  |  |  |  |  |  |  |  |  |  |  |  |  |  |
|-------------------------------|--|--|--|--|--|--|--|--|--|--|--|--|--|--|
| Arthritis / Joint pain        |  |  |  |  |  |  |  |  |  |  |  |  |  |  |
| Diabetes                      |  |  |  |  |  |  |  |  |  |  |  |  |  |  |
| Connective Tissue Disorder    |  |  |  |  |  |  |  |  |  |  |  |  |  |  |
| Other:                        |  |  |  |  |  |  |  |  |  |  |  |  |  |  |
| Unknown / Unavailable history |  |  |  |  |  |  |  |  |  |  |  |  |  |  |

**Office Use Only**

Questionnaire Reviewed By \_\_\_\_\_
